# Supplementary material for: Genome-Wide Identification and Functional Analysis of RF2 Gene Family and the Critical Role of GhRF2-32 in Response to Drought Stress in Cotton
Source: MDPI journal article supplement (doi:10.3390/plants12142613), 2023-07-11
Supplement: s1 [file s1]

**Table S1: Use NCBI designed differentially expressed gene-specific primer sequences.**

| Primer name    | sequence (5' to 3')                                 | Number of bases | Purification method |
|----------------|-----------------------------------------------------|-----------------|---------------------|
| GhActin QF     | ATCCTCCGTCTTGACCTTG                                 | 19              | PAGE                |
| GhActin QR     | TGTCCGTCAGGCAACTCAT                                 | 19              | PAGE                |
| GhRF2-2F       | GGAGCTAATCAACAATACTACCC<br>CA                       | 25              | PAGE                |
| GhRF2-2R       | CCCAGTTTGATGTTGCGGTT                                | 20              | PAGE                |
| GhRF2-3F       | CCTCCGATGACTCCTCATGC                                | 20              | PAGE                |
| GhRF2-3R       | CAACCCGAGTCCATCAAAGA                                | 20              | PAGE                |
| GhRF2-4F       | GCAACAGGCCCAACTGAAAG                                | 20              | PAGE                |
| GhRF2-4R       | CCTCTCCACTGAACTCTGCG                                | 20              | PAGE                |
| GhRF2-5F       | TTTCCCACTGTTTCCCCAGC                                | 20              | PAGE                |
| GhRF2-5R       | GGAGGCTTTCGGAGGAAGTG                                | 20              | PAGE                |
| GhRF2-6F       | CTCGGACCGACTCATTCTCG                                | 20              | PAGE                |
| GhRF2-6R       | GGCAAACCTTTAACGAATGCGA                              | 21              | PAGE                |
| GhRF2-16F      | TCCAAGTGGGCTTCCTTCTTTA                              | 22              | PAGE                |
| GhRF2-16R      | CATTGCTGTTGATTGTGCTCG                               | 22              | PAGE                |
| GhRF2-20F      | CATACTCTGCTAACCGCGCA                                | 20              | PAGE                |
| GhRF2-20R      | CCATGTCCCCCGTTTGATGT                                | 20              | PAGE                |
| GhRF2-22F      | AAGTCCAGCGACTGAAGCTC                                | 20              | PAGE                |
| GhRF2-22R      | ATGTTTCGCTGCTGCTGTTG                                | 20              | PAGE                |
| GhRF2-23F      | TGCACTTCCTCTGAAAGCCT                                | 20              | PAGE                |
| GhRF2-23R      | GCACAGGAGTCTCTGGTTCA                                | 20              | PAGE                |
| GhRF2-24F      | CCGCGGAAGTCCATCGATTA                                | 20              | PAGE                |
| GhRF2-24R      | CTGTTGCTGGTGTAGCTGGA                                | 20              | PAGE                |
| GhRF2-32F      | ATCCACCAAGTCTGAAGCCG                                | 20              | PAGE                |
| GhRF2-32R      | AGAGCCTCGGAAAGTGTTG                                 | 20              | PAGE                |
| GhRF2-35F      | CTTTAACGGCGGTGCTGCT                                 | 19              | PAGE                |
| GhRF2-35R      | ATCTGGTTGGGGTGTGAAGG                                | 20              | PAGE                |
| RF2-32V-XbaI-F | AAGGTTACCGAATTCTCTAGACA<br>CCCCTTCTTTTCCCAACC       | 41              | PAGE                |
| RF2-32V-KpnI-R | GAGACGCGTGAGCTCGGTACCCC<br>TTCATTAGTCTTCTCCCCCA     | 43              | PAGE                |
| RF2b-DsRED2-F  | ctagtggtgtttgcaagcttATGCAGGATCC<br>ACCAAGTCTGA      | 43              | PAGE                |
| RF2b-DsRED2-R  | acgacggccagtgccaagcttTCATAATGTT<br>CCACTACTTTCACCAG | 47              | PAGE                |

**Table S2. Physico-chemical and biochemical characteristics of RF2 genes in cotton**

| Transcript ID       | gene name | Length<br>(aa) | ORF<br>length(bp) | MW       | PI   | Stability<br>index | Subcellular<br>prediction |
|---------------------|-----------|----------------|-------------------|----------|------|--------------------|---------------------------|
| evm.model.Ga01G0609 | GaRF2-1   | 320            | 963               | 35999.05 | 6.51 | 62.38              | Nuclear                   |
| evm.model.Ga03G0132 | GaRF2-2   | 386            | 1161              | 41901.59 | 5.83 | 47.83              | Nuclear                   |
| evm.model.Ga03G0756 | GaRF2-3   | 341            | 1026              | 37967.43 | 7.87 | 57.85              | Nuclear                   |
| evm.model.Ga03G1126 | GaRF2-4   | 570            | 1713              | 62392.85 | 6.19 | 68.16              | Nuclear                   |
| evm.model.Ga03G2503 | GaRF2-5   | 370            | 1113              | 41478.06 | 9.17 | 68.14              | Nuclear                   |
| evm.model.Ga03G2578 | GaRF2-6   | 552            | 1659              | 59952.97 | 6.35 | 60.19              | Nuclear                   |
| evm.model.Ga04G0296 | GaRF2-7   | 363            | 1092              | 40943.53 | 8.34 | 70.15              | Nuclear                   |
| evm.model.Ga04G1998 | GaRF2-8   | 341            | 1026              | 37612.05 | 5.69 | 52.81              | Nuclear                   |
| evm.model.Ga05G2881 | GaRF2-9   | 323            | 972               | 35523.38 | 6.74 | 48.88              | Nuclear                   |
| evm.model.Ga05G2977 | GaRF2-10  | 366            | 1101              | 39941.29 | 5.78 | 55.40              | Nuclear                   |
| evm.model.Ga06G2190 | GaRF2-11  | 369            | 1110              | 39858.34 | 5.68 | 45.14              | Nuclear/chloroplast       |
| evm.model.Ga08G2367 | GaRF2-12  | 220            | 663               | 24923.90 | 5.80 | 38.66              | Nuclear                   |
| evm.model.Ga09G2394 | GaRF2-13  | 415            | 1248              | 44992.04 | 5.65 | 52.09              | Nuclear                   |
| evm.model.Ga10G0927 | GaRF2-14  | 361            | 1086              | 39327.88 | 5.83 | 51.63              | Nuclear                   |
| evm.model.Ga10G1669 | GaRF2-15  | 398            | 1197              | 43657.51 | 6.44 | 52.22              | Nuclear                   |
| evm.model.Ga11G0563 | GaRF2-16  | 284            | 855               | 31952.72 | 5.59 | 59.06              | Nuclear                   |
| evm.model.Ga13G0339 | GaRF2-17  | 381            | 1146              | 42583.94 | 8.36 | 63.35              | Nuclear                   |
| evm.model.Ga13G1080 | GaRF2-18  | 567            | 1704              | 61330.68 | 6.30 | 54.32              | Nuclear                   |
| evm.model.Ga13G1858 | GaRF2-19  | 319            | 960               | 35902.12 | 6.34 | 72.45              | Nuclear                   |
| evm.model.Ga14G0186 | GaRF2-20  | 366            | 1101              | 41362.63 | 6.65 | 69.57              | Nuclear                   |
| Gbar_A01G004970.1   | GbRF2-1   | 320            | 963               | 35999.05 | 6.51 | 62.38              | Nuclear                   |
| Gbar_A02G001100.1   | GbRF2-2   | 386            | 1161              | 41899.57 | 5.83 | 48.61              | Nuclear                   |
| Gbar_A02G006540.1   | GbRF2-3   | 337            | 1014              | 37499.96 | 7.89 | 54.64              | Nuclear                   |
| Gbar_A03G009220.1   | GbRF2-4   | 572            | 1719              | 62567.05 | 6.30 | 67.75              | Nuclear                   |
| Gbar_A03G021150.1   | GbRF2-5   | 370            | 1113              | 41479.00 | 8.91 | 68.37              | Nuclear                   |
| Gbar_A03G021900.1   | GbRF2-6   | 552            | 1659              | 59961.04 | 6.49 | 61.54              | Nuclear                   |
| Gbar_A05G026560.1   | GbRF2-7   | 323            | 972               | 35667.55 | 6.96 | 49.59              | Nuclear                   |
| Gbar_A05G027450.1   | GbRF2-8   | 371            | 1116              | 40489.95 | 5.85 | 55.69              | Nuclear                   |
| Gbar_A05G040630.1   | GbRF2-9   | 341            | 1026              | 37486.83 | 5.57 | 52.25              | Nuclear                   |
| Gbar_A06G019370.1   | GbRF2-10  | 248            | 747               | 27199.55 | 7.79 | 39.97              | Nuclear/chloroplast       |
| Gbar_A07G025540.1   | GbRF2-11  | 319            | 960               | 35872.03 | 6.34 | 72.57              | Nuclear                   |
| Gbar_A09G022230.1   | GbRF2-12  | 413            | 1242              | 44920.97 | 5.96 | 52.62              | Nuclear                   |
| Gbar_A10G014980.1   | GbRF2-13  | 398            | 1197              | 43658.49 | 6.41 | 50.16              | Nuclear                   |
| Gbar_A10G019270.1   | GbRF2-14  | 361            | 1086              | 39475.04 | 5.83 | 50.16              | Nuclear                   |
| Gbar_A11G030850.1   | GbRF2-15  | 283            | 852               | 31838.62 | 5.59 | 60.10              | Nuclear                   |
| Gbar_A12G002500.1   | GbRF2-16  | 367            | 1104              | 41331.52 | 6.65 | 68.30              | Nuclear                   |
| Gbar_A13G003620.1   | GbRF2-17  | 381            | 1146              | 42536.84 | 7.20 | 64.00              | Nuclear                   |

|                   |          |     |      |          |      |       |                     |
|-------------------|----------|-----|------|----------|------|-------|---------------------|
| Gbar_A13G009350.1 | GbRF2-18 | 567 | 1704 | 61353.72 | 6.35 | 54.32 | Nuclear             |
| Gbar_D01G005120.1 | GbRF2-19 | 320 | 963  | 36067.13 | 6.65 | 61.91 | Nuclear             |
| Gbar_D02G001400.1 | GbRF2-20 | 386 | 1161 | 41920.67 | 6.01 | 44.75 | Nuclear             |
| Gbar_D02G007490.1 | GbRF2-21 | 334 | 1005 | 37189.64 | 8.51 | 53.15 | Nuclear             |
| Gbar_D02G010420.1 | GbRF2-22 | 563 | 1692 | 61959.48 | 6.59 | 65.96 | Nuclear             |
| Gbar_D02G023090.1 | GbRF2-23 | 370 | 1113 | 41357.68 | 7.75 | 64.06 | Nuclear             |
| Gbar_D02G023830.1 | GbRF2-24 | 556 | 1671 | 60289.43 | 6.42 | 61.27 | Nuclear             |
| Gbar_D04G001290.1 | GbRF2-25 | 341 | 1026 | 37545.99 | 5.69 | 52.89 | Nuclear             |
| Gbar_D04G017730.1 | GbRF2-26 | 350 | 1053 | 39175.24 | 6.28 | 65.45 | Nuclear             |
| Gbar_D04G017740.1 | GbRF2-27 | 382 | 1149 | 42921.72 | 7.18 | 68.92 | Nuclear/chloroplast |
| Gbar_D05G027400.1 | GbRF2-28 | 323 | 972  | 35527.43 | 6.96 | 48.17 | Nuclear             |
| Gbar_D05G028280.1 | GbRF2-29 | 371 | 1116 | 40410.85 | 6.04 | 57.12 | Nuclear             |
| Gbar_D06G020250.1 | GbRF2-30 | 264 | 795  | 29212.01 | 9.13 | 44.99 | Nuclear/chloroplast |
| Gbar_D09G021980.1 | GbRF2-31 | 413 | 1242 | 44784.84 | 5.90 | 52.24 | Nuclear             |
| Gbar_D10G013120.1 | GbRF2-32 | 398 | 1197 | 43664.44 | 6.53 | 51.51 | Nuclear             |
| Gbar_D10G019420.1 | GbRF2-33 | 361 | 1086 | 39209.70 | 5.66 | 51.84 | Nuclear             |
| Gbar_D11G031450.1 | GbRF2-34 | 277 | 834  | 31285.12 | 5.52 | 61.24 | Nuclear             |
| Gbar_D12G002730.1 | GbRF2-35 | 372 | 1119 | 41887.15 | 6.85 | 65.61 | Nuclear             |
| Gbar_D12G023100.1 | GbRF2-36 | 113 | 342  | 13220.02 | 6.91 | 35.50 | Nuclear             |
| Gbar_D13G003400.1 | GbRF2-37 | 379 | 1140 | 42413.72 | 7.80 | 62.60 | Nuclear             |
| Gbar_D13G009810.1 | GbRF2-38 | 567 | 1704 | 61376.67 | 6.17 | 53.49 | Nuclear             |
| Gbar_D13G016200.1 | GbRF2-39 | 260 | 783  | 28995.66 | 6.23 | 64.89 | Nuclear             |
| Ghir_A01G022860.1 | GhRF2-1  | 320 | 963  | 35999.05 | 6.51 | 62.38 | Nuclear             |
| Ghir_A02G001350.1 | GhRF2-2  | 386 | 1161 | 41899.57 | 5.83 | 48.61 | Nuclear             |
| Ghir_A02G006740.1 | GhRF2-3  | 340 | 1023 | 37884.35 | 7.89 | 55.95 | Nuclear             |
| Ghir_A03G009200.1 | GhRF2-4  | 570 | 1713 | 62360.85 | 6.30 | 67.02 | Nuclear             |
| Ghir_A03G021100.1 | GhRF2-5  | 370 | 1113 | 41479.00 | 8.91 | 68.37 | Nuclear             |
| Ghir_A03G021810.1 | GhRF2-6  | 536 | 1611 | 58213.97 | 6.22 | 57.88 | Nuclear             |
| Ghir_A05G027550.1 | GhRF2-7  | 364 | 1095 | 40054.03 | 8.68 | 46.02 | Nuclear/chloroplast |
| Ghir_A05G028410.1 | GhRF2-8  | 330 | 993  | 35979.36 | 7.08 | 43.87 | Nuclear             |
| Ghir_A05G041580.1 | GhRF2-9  | 341 | 1026 | 37545.90 | 5.69 | 52.33 | Nuclear             |
| Ghir_A06G019360.1 | GhRF2-10 | 354 | 1065 | 38204.46 | 5.51 | 41.49 | Nuclear/chloroplast |
| Ghir_A09G022110.1 | GhRF2-11 | 413 | 1242 | 44920.97 | 5.96 | 52.62 | Nuclear             |
| Ghir_A10G014150.1 | GhRF2-12 | 398 | 1197 | 43672.52 | 6.53 | 50.62 | Nuclear             |
| Ghir_A10G018390.1 | GhRF2-13 | 359 | 1080 | 38972.35 | 5.59 | 48.49 | Nuclear             |
| Ghir_A11G031340.1 | GhRF2-14 | 284 | 855  | 31968.76 | 5.59 | 58.38 | Nuclear             |
| Ghir_A12G002680.1 | GhRF2-15 | 387 | 1164 | 43898.61 | 8.91 | 64.20 | Nuclear             |
| Ghir_A13G003420.1 | GhRF2-16 | 381 | 1146 | 42583.94 | 8.36 | 63.35 | Nuclear             |
| Ghir_A13G009010.1 | GhRF2-17 | 553 | 1662 | 59905.16 | 6.22 | 53.30 | Nuclear             |
| Ghir_A13G015530.1 | GhRF2-18 | 319 | 960  | 35872.03 | 6.34 | 72.57 | Nuclear             |

|                   |          |     |      |          |      |       |                     |
|-------------------|----------|-----|------|----------|------|-------|---------------------|
| Ghir_D01G005170.1 | GhRF2-19 | 320 | 963  | 36093.21 | 6.56 | 61.13 | Nuclear             |
| Ghir_D02G001430.1 | GhRF2-20 | 386 | 1161 | 41917.71 | 6.01 | 45.88 | Nuclear             |
| Ghir_D02G007160.1 | GhRF2-21 | 228 | 687  | 25027.22 | 6.71 | 54.15 | Nuclear             |
| Ghir_D02G010000.1 | GhRF2-22 | 563 | 1692 | 61911.48 | 6.75 | 65.30 | Nuclear             |
| Ghir_D02G022550.1 | GhRF2-23 | 370 | 1113 | 41357.68 | 7.75 | 65.62 | Nuclear             |
| Ghir_D02G023300.1 | GhRF2-24 | 556 | 1671 | 60275.36 | 6.30 | 60.57 | Nuclear             |
| Ghir_D04G001370.1 | GhRF2-25 | 341 | 1026 | 37531.96 | 5.69 | 52.97 | Nuclear             |
| Ghir_D04G017590.1 | GhRF2-26 | 335 | 1008 | 37379.10 | 6.46 | 68.54 | Nuclear             |
| Ghir_D05G027570.1 | GhRF2-27 | 323 | 972  | 35485.39 | 7.31 | 49.52 | Nuclear             |
| Ghir_D05G028420.1 | GhRF2-28 | 371 | 1116 | 40357.80 | 5.89 | 58.00 | Nuclear             |
| Ghir_D06G020520.1 | GhRF2-29 | 377 | 1134 | 41036.62 | 5.81 | 48.38 | Nuclear/chloroplast |
| Ghir_D09G021400.1 | GhRF2-30 | 413 | 1242 | 44842.88 | 5.79 | 52.24 | Nuclear             |
| Ghir_D10G013410.1 | GhRF2-31 | 379 | 1140 | 41651.17 | 6.66 | 53.30 | Nuclear             |
| Ghir_D10G019890.1 | GhRF2-32 | 361 | 1086 | 39214.72 | 5.59 | 52.15 | Nuclear             |
| Ghir_D12G002680.1 | GhRF2-33 | 369 | 1110 | 41565.81 | 6.85 | 65.02 | Nuclear             |
| Ghir_D13G003680.1 | GhRF2-34 | 379 | 1140 | 42413.72 | 7.80 | 62.60 | Nuclear             |
| Ghir_D13G009990.1 | GhRF2-35 | 567 | 1704 | 61391.64 | 6.17 | 54.06 | Nuclear             |
| Ghir_D13G016290.1 | GhRF2-36 | 290 | 873  | 32672.44 | 6.61 | 73.98 | Nuclear             |
| XP_012441813.1    | GrRF2-1  | 567 | 1704 | 61304.65 | 6.30 | 53.19 | Nuclear             |
| XP_012457700.1    | GrRF2-2  | 320 | 963  | 35974.05 | 6.56 | 64.17 | Nuclear             |
| XP_012481534.1    | GrRF2-3  | 386 | 1161 | 42018.77 | 5.90 | 48.36 | Nuclear             |
| XP_012478118.1    | GrRF2-4  | 569 | 1710 | 62572.12 | 6.45 | 66.37 | Nuclear             |
| XP_012480294.1    | GrRF2-5  | 370 | 1113 | 41429.73 | 8.40 | 66.79 | Nuclear             |
| XP_012480421.1    | GrRF2-6  | 556 | 1671 | 60289.38 | 6.30 | 59.94 | Nuclear             |
| XP_012487039.1    | GrRF2-7  | 413 | 1242 | 44828.85 | 5.79 | 52.24 | Nuclear             |
| XP_012488308.1    | GrRF2-8  | 280 | 843  | 31510.27 | 5.38 | 60.19 | Nuclear             |
| XP_012436227.1    | GrRF2-9  | 374 | 1125 | 42111.36 | 6.85 | 66.43 | Nuclear             |
| XP_012446799.1    | GrRF2-10 | 323 | 972  | 35543.43 | 6.96 | 48.93 | Nuclear             |
| XP_012447231.1    | GrRF2-11 | 371 | 1116 | 40353.75 | 6.04 | 57.32 | Nuclear             |
| XP_012449361.1    | GrRF2-12 | 349 | 1050 | 37764.96 | 5.64 | 45.41 | Nuclear/chloroplast |
| XP_012456530.1    | GrRF2-13 | 398 | 1197 | 43657.41 | 6.38 | 49.57 | Nuclear             |
| XP_012456653.1    | GrRF2-14 | 361 | 1086 | 39228.74 | 5.59 | 53.06 | Nuclear             |
| XP_012460397.1    | GrRF2-15 | 341 | 1026 | 37432.76 | 5.57 | 53.06 | Nuclear             |
| XP_012460807.1    | GrRF2-16 | 363 | 1092 | 40677.87 | 6.61 | 64.77 | Nuclear             |
| XP_012463962.1    | GrRF2-17 | 379 | 1140 | 42370.74 | 8.64 | 63.75 | Nuclear             |
| XP_012464256.1    | GrRF2-18 | 319 | 960  | 35871.10 | 6.34 | 72.89 | Nuclear             |



**Table S3. FPKM value of each gene presented in Figure 6**

|                   |          | 4°C 1h   | 4°C 3h    | 4°C 6h   | 4°C 12h  | 4°C 24h  | NaCl 1h  | NaCl 3h  | NaCl 6h  | NaCl 12h | NaCl 24h | PEG 1h   | PEG 3h   | PEG 6h   | PEG 12h  | PEG 24h  |
|-------------------|----------|----------|-----------|----------|----------|----------|----------|----------|----------|----------|----------|----------|----------|----------|----------|----------|
| Ghir_A01G022860.1 | GhRF2-1  | 1.125359 | 0.421888  | 3.032503 | 0.234322 | 0.619973 | 0.121385 | 0.202156 | 0.32055  | 0.428481 | 0.325875 | 0.191437 | 0.169832 | 0.181163 | 0.89282  | 0.266219 |
| Ghir_A02G001350.1 | GhRF2-2  | 3.142973 | 4.178137  | 4.178843 | 5.563423 | 6.033443 | 3.208757 | 5.783    | 5.796437 | 8.0806   | 3.29283  | 4.622527 | 5.76264  | 5.801367 | 6.91742  | 2.971487 |
| Ghir_A02G006740.1 | GhRF2-3  | 5.11465  | 5.777067  | 3.847627 | 3.914937 | 3.588397 | 5.965667 | 6.848587 | 5.140423 | 6.423375 | 6.456917 | 6.904253 | 8.487477 | 7.039667 | 8.562827 | 6.64241  |
| Ghir_A03G009200.1 | GhRF2-4  | 5.16443  | 5.422053  | 5.82138  | 4.296883 | 4.769027 | 4.7229   | 5.81069  | 6.725787 | 7.45368  | 4.287233 | 5.5626   | 6.385027 | 6.023357 | 9.20926  | 5.110577 |
| Ghir_A03G021100.1 | GhRF2-5  | 2.706437 | 3.26012   | 4.067003 | 3.930347 | 3.778277 | 5.227793 | 4.732277 | 3.508667 | 8.243405 | 3.323077 | 2.931253 | 3.635423 | 4.199383 | 7.48287  | 3.80887  |
| Ghir_A03G021810.1 | GhRF2-6  | 9.167237 | 15.0691   | 11.70023 | 25.931   | 17.85043 | 6.17765  | 14.1562  | 11.49777 | 14.934   | 8.801467 | 8.611653 | 9.79303  | 10.40757 | 15.9889  | 8.264723 |
| Ghir_A05G027550.1 | GhRF2-7  | 1.271605 | 2.37915   | 1.69784  | 2.148609 | 3.2494   | 1.886324 | 2.139364 | 1.834639 | 3.52884  | 1.509283 | 2.811557 | 3.114083 | 2.54952  | 2.365473 | 0.979006 |
| Ghir_A05G028410.1 | GhRF2-8  | 0.169941 | 0.208619  | 0        | 0.120706 | 0        | 0.018533 | 0.037242 | 0.299656 | 0        | 0.020125 | 0.034914 | 0.092542 | 0.133915 | 0.041109 |          |
| Ghir_A05G041580.1 | GhRF2-9  | 1.138307 | 0.593992  | 1.045159 | 0.258995 | 0.207488 | 0.408    | 0.423204 | 0.399232 | 1.153976 | 0.531702 | 0.562698 | 0.301235 | 0.556149 | 1.77011  | 0.90178  |
| Ghir_A06G019360.1 | GhRF2-10 | 1.24473  | 1.191722  | 1.273753 | 0.850207 | 0.800988 | 0.866906 | 0.697133 | 0.781655 | 0.626101 | 0.671104 | 0.505932 | 0.387928 | 0.528108 | 0.963711 | 0.89248  |
| Ghir_A09G022110.1 | GhRF2-11 | 1.857317 | 2.501917  | 1.910067 | 1.163825 | 1.052953 | 0.818728 | 1.55001  | 1.9449   | 1.300866 | 1.034966 | 1.517363 | 1.13674  | 1.596626 | 2.21399  | 1.123849 |
| Ghir_A10G014150.1 | GhRF2-12 | 0.931602 | 1.011521  | 1.519542 | 1.946068 | 1.779656 | 3.679953 | 1.49701  | 1.429143 | 2.27523  | 0.742379 | 1.222603 | 1.278599 | 1.45907  | 2.265687 | 1.035543 |
| Ghir_A10G018390.1 | GhRF2-13 | 1.268132 | 0.933428  | 1.008776 | 0.65891  | 0.34891  | 1.4777   | 0.749255 | 0.883508 | 1.515995 | 0.35789  | 0.793918 | 0.565478 | 0.835507 | 1.728507 | 0.613575 |
| Ghir_A11G031340.1 | GhRF2-14 | 0.039834 | 0         | 0        | 0        | 0        | 0.085187 | 0        | 0        | 0        | 0        | 0        | 0        | 0        | 0        | 0        |
| Ghir_A12G002680.1 | GhRF2-15 | 0.535921 | 0.535732  | 0.744996 | 0.348004 | 0.154311 | 0.149382 | 0.381139 | 0.547196 | 0.598702 | 0.218396 | 0.220726 | 0.275611 | 0.21234  | 1.598848 | 0.188793 |
| Ghir_A13G003420.1 | GhRF2-16 | 3.870483 | 8.741437  | 13.33746 | 6.816743 | 3.492853 | 5.32787  | 5.65303  | 7.009013 | 6.274465 | 2.037687 | 5.602397 | 5.26954  | 5.13008  | 4.33877  | 2.597563 |
| Ghir_A13G009010.1 | GhRF2-17 | 7.914783 | 12.71081  | 7.30222  | 8.768907 | 6.549463 | 5.51394  | 6.772367 | 6.57741  | 6.21     | 6.379927 | 6.16629  | 5.578107 | 4.642873 | 8.3372   | 6.99526  |
| Ghir_A13G015530.1 | GhRF2-18 | 0.149494 | 0.129193  | 0.413265 | 0.071001 | 0.05765  | 0.043466 | 0.040462 | 0.068221 | 0.032412 | 0.006201 | 0.014523 | 0.121977 | 0.057978 | 0.106537 | 0.11685  |
| Ghir_D01G005170.1 | GhRF2-19 | 1.273937 | 0.751422  | 4.363224 | 0.733575 | 1.468435 | 0.316759 | 0.608793 | 0.66458  | 0.5833   | 0.391861 | 0.38133  | 0.711966 | 0.720383 | 1.256948 | 0.395534 |
| Ghir_D02G001430.1 | GhRF2-20 | 5.306097 | 7.80598   | 7.25784  | 8.794553 | 7.601833 | 3.579503 | 7.266197 | 6.888283 | 10.69907 | 4.28281  | 6.798927 | 8.10332  | 7.168647 | 10.43908 | 5.544873 |
| Ghir_D02G007160.1 | GhRF2-21 | 5.116507 | 5.40005   | 2.91979  | 3.676337 | 3.47741  | 4.716087 | 5.570583 | 5.102127 | 7.36056  | 4.13498  | 7.59803  | 6.26456  | 5.74385  | 6.79431  | 4.197593 |
| Ghir_D02G010000.1 | GhRF2-22 | 6.220553 | 6.275287  | 6.838503 | 6.088037 | 6.376857 | 5.964997 | 6.47097  | 5.88501  | 9.04754  | 5.13287  | 5.519663 | 6.787913 | 6.47959  | 9.317453 | 5.54536  |
| Ghir_D02G022550.1 | GhRF2-23 | 1.920263 | 2.617127  | 2.612123 | 2.67636  | 3.78214  | 6.29191  | 3.40534  | 3.305683 | 6.77737  | 2.485263 | 2.905003 | 2.726067 | 2.73711  | 6.19452  | 3.14622  |
| Ghir_D02G023300.1 | GhRF2-24 | 7.391207 | 19.50067  | 21.5744  | 41.6283  | 30.9102  | 4.565553 | 15.4241  | 16.49453 | 20.8609  | 4.83017  | 8.865093 | 10.18639 | 14.14297 | 25.0625  | 6.517647 |
| Ghir_D04G001370.1 | GhRF2-25 | 1.044226 | 1.249953  | 1.04185  | 1.088689 | 0.641272 | 0.606554 | 0.819614 | 0.885307 | 1.23921  | 0.835779 | 0.6075   | 0.797117 | 0.770968 | 0.906211 | 0.784064 |
| Ghir_D04G017590.1 | GhRF2-26 | 2.231021 | 1.78481   | 0.781745 | 1.009815 | 0.487167 | 0.204251 | 0.734138 | 1.151526 | 1.441004 | 1.026545 | 1.144538 | 1.463365 | 1.058778 | 0.772547 | 1.378406 |
| Ghir_D05G027570.1 | GhRF2-27 | 3.593467 | 6.244987  | 3.88937  | 6.781143 | 9.237257 | 5.826573 | 7.10295  | 4.955647 | 10.28886 | 7.525407 | 8.135547 | 8.463157 | 8.820693 | 6.34814  | 5.30038  |
| Ghir_D05G028420.1 | GhRF2-28 | 1.096928 | 0.494797  | 0.415027 | 0.139416 | 0.056765 | 0.338755 | 0.467909 | 0.436246 | 1.168555 | 0.203687 | 0.403204 | 0.361538 | 0.339321 | 1.269009 | 0.445098 |
| Ghir_D06G020520.1 | GhRF2-29 | 1.966155 | 1.386173  | 1.252359 | 0.986209 | 0.920135 | 2.560233 | 1.5388   | 1.40901  | 1.64184  | 1.041589 | 1.194245 | 1.310103 | 1.157085 | 2.001923 | 1.969013 |
| Ghir_D09G021400.1 | GhRF2-30 | 2.039134 | 1.46643   | 1.78535  | 1.663827 | 1.77072  | 1.003431 | 2.277097 | 1.88051  | 1.803999 | 1.048191 | 2.096917 | 2.394572 | 2.413757 | 2.262747 | 1.658632 |
| Ghir_D10G013410.1 | GhRF2-31 | 1.987923 | 2.97192   | 2.300542 | 2.758087 | 3.461613 | 3.046633 | 2.131431 | 2.115687 | 4.485215 | 1.211249 | 1.706021 | 1.81253  | 3.04662  | 2.48625  | 1.227398 |
| Ghir_D10G019890.1 | GhRF2-32 | 4.345757 | 2.437463  | 4.37561  | 2.182223 | 1.984967 | 2.868594 | 2.62403  | 2.57811  | 4.215235 | 1.42086  | 1.778913 | 1.977092 | 2.03157  | 4.998657 | 2.259597 |
| Ghir_D12G002680.1 | GhRF2-33 | 0.858036 | 0.988781  | 1.094811 | 0.640697 | 0.46111  | 0.672858 | 0.904027 | 1.170702 | 1.48601  | 0.6832   | 0.930867 | 1.160736 | 1.16113  | 1.819657 | 1.173599 |
| Ghir_D13G003680.1 | GhRF2-34 | 1.628151 | 2.499873  | 5.073103 | 1.741543 | 0.975605 | 6.763027 | 2.10453  | 1.726957 | 1.936855 | 0.830573 | 1.747123 | 1.79186  | 2.134    | 1.973027 | 0.96439  |
| Ghir_D13G009990.1 | GhRF2-35 | 6.759963 | 10.651418 | 2.24853  | 7.560457 | 5.74037  | 6.306477 | 5.05891  | 4.644453 | 5.657275 | 5.073193 | 5.043577 | 3.849313 | 4.082903 | 8.298593 | 6.704423 |
| Ghir_D13G016290.1 | GhRF2-36 | 0.322297 | 0.32178   | 0.268806 | 0.024313 | 0.039497 | 0        | 0.245406 | 0.113224 | 0.036273 | 0        | 0        | 0.022528 | 0.042917 | 0.090537 | 0.069679 |

**Table S4a. cis elements in Ga RF2 genes**

|                     |      |    |   |                                |
|---------------------|------|----|---|--------------------------------|
| evm.model.Ga01G0609 | 1600 | 6  | - | light responsiveness           |
| evm.model.Ga01G0609 | 1116 | 7  | - | auxin responsiveness           |
| evm.model.Ga01G0609 | 1600 | 6  | - | abscisic acid responsiveness   |
| evm.model.Ga01G0609 | 1601 | 5  | + | abscisic acid responsiveness   |
| evm.model.Ga01G0609 | 308  | 6  | + | light responsiveness           |
| evm.model.Ga01G0609 | 510  | 6  | + | light responsiveness           |
| evm.model.Ga01G0609 | 580  | 6  | + | light responsiveness           |
| evm.model.Ga01G0609 | 601  | 6  | + | light responsiveness           |
| evm.model.Ga01G0609 | 621  | 6  | + | light responsiveness           |
| evm.model.Ga01G0609 | 763  | 6  | + | light responsiveness           |
| evm.model.Ga01G0609 | 323  | 6  | + | anaerobic induction            |
| evm.model.Ga01G0609 | 1032 | 6  | - | anaerobic induction            |
| evm.model.Ga01G0609 | 1000 | 7  | + | light responsiveness           |
| evm.model.Ga01G0609 | 1777 | 6  | - | light responsiveness           |
| evm.model.Ga01G0609 | 1600 | 6  | - | light responsiveness           |
| evm.model.Ga01G0609 | 1868 | 6  | - | light responsiveness           |
| evm.model.Ga03G0132 | 829  | 6  | + | low-temperature responsiveness |
| evm.model.Ga03G0132 | 261  | 6  | + | light responsiveness           |
| evm.model.Ga03G0132 | 999  | 5  | - | MeJA responsiveness            |
| evm.model.Ga03G0132 | 1725 | 9  | + | salicylic acid responsiveness  |
| evm.model.Ga03G0132 | 261  | 8  | - | light responsiveness           |
| evm.model.Ga03G0132 | 877  | 6  | - | auxin responsiveness           |
| evm.model.Ga03G0132 | 353  | 6  | - | light responsiveness           |
| evm.model.Ga03G0132 | 788  | 6  | + | light responsiveness           |
| evm.model.Ga03G0132 | 999  | 5  | + | MeJA responsiveness            |
| evm.model.Ga03G0132 | 497  | 10 | + | light responsiveness           |
| evm.model.Ga03G0132 | 340  | 6  | + | light responsiveness           |
| evm.model.Ga03G0132 | 926  | 6  | + | light responsiveness           |
| evm.model.Ga03G0132 | 946  | 6  | + | light responsiveness           |
| evm.model.Ga03G0132 | 1247 | 6  | - | light responsiveness           |
| evm.model.Ga03G0132 | 1337 | 6  | - | light responsiveness           |
| evm.model.Ga03G0132 | 1495 | 6  | - | light responsiveness           |
| evm.model.Ga03G0132 | 1605 | 6  | - | light responsiveness           |
| evm.model.Ga03G0132 | 261  | 5  | - | abscisic acid responsiveness   |
| evm.model.Ga03G0756 | 858  | 5  | - | MeJA responsiveness            |
| evm.model.Ga03G0756 | 136  | 10 | + | light responsiveness           |
| evm.model.Ga03G0756 | 275  | 10 | - | light responsiveness           |
| evm.model.Ga03G0756 | 346  | 6  | - | light responsiveness           |
| evm.model.Ga03G0756 | 1462 | 6  | - | light responsiveness           |

|                     |      |     |   |                                   |
|---------------------|------|-----|---|-----------------------------------|
| evm.model.Ga03G0756 | 295  | 7   | - | light responsiveness              |
| evm.model.Ga03G0756 | 1959 | 10  | + | light responsiveness              |
| evm.model.Ga03G0756 | 782  | 6   | - | drought inducibility              |
| evm.model.Ga03G0756 | 333  | 9   | - | defense and stress responsiveness |
| evm.model.Ga03G0756 | 1937 | 9   | + | defense and stress responsiveness |
| evm.model.Ga03G0756 | 1702 | 6   | - | light responsiveness              |
| evm.model.Ga03G0756 | 183  | 5   | + | abscisic acid responsiveness      |
| evm.model.Ga03G0756 | 347  | 5   | + | abscisic acid responsiveness      |
| evm.model.Ga03G0756 | 860  | 5   | + | abscisic acid responsiveness      |
| evm.model.Ga03G0756 | 1463 | 5   | + | abscisic acid responsiveness      |
| evm.model.Ga03G0756 | 505  | 6   | + | light responsiveness              |
| evm.model.Ga03G0756 | 858  | 5   | + | MeJA responsiveness               |
| evm.model.Ga03G0756 | 1445 | 6   | + | light responsiveness              |
| evm.model.Ga03G0756 | 1545 | 6   | - | light responsiveness              |
| evm.model.Ga03G0756 | 289  | 6   | - | auxin responsiveness              |
| evm.model.Ga03G0756 | 182  | 6   | + | light responsiveness              |
| evm.model.Ga03G0756 | 859  | 6   | - | light responsiveness              |
| evm.model.Ga03G0756 | 1460 | 8   | + | light responsiveness              |
| evm.model.Ga03G1126 | 1235 | 10  | + | light responsiveness              |
| evm.model.Ga03G1126 | 265  | 6   | - | light responsiveness              |
| evm.model.Ga03G1126 | 1002 | 6   | - | anaerobic induction               |
| evm.model.Ga03G1126 | 1953 | 9.5 | - | light responsiveness              |
| evm.model.Ga03G1126 | 848  | 6   | + | light responsiveness              |
| evm.model.Ga03G1126 | 1697 | 6   | - | light responsiveness              |
| evm.model.Ga03G1126 | 1921 | 9   | - | light responsiveness              |
| evm.model.Ga03G1126 | 226  | 7   | - | light responsiveness              |
| evm.model.Ga03G1126 | 1055 | 6   | - | auxin responsiveness              |
| evm.model.Ga03G1126 | 241  | 6   | - | light responsiveness              |
| evm.model.Ga03G1126 | 163  | 6   | + | light responsiveness              |
| evm.model.Ga03G1126 | 771  | 6   | - | light responsiveness              |
| evm.model.Ga03G1126 | 1218 | 6   | + | light responsiveness              |
| evm.model.Ga03G1126 | 1896 | 6   | - | light responsiveness              |
| evm.model.Ga03G1126 | 241  | 5   | - | abscisic acid responsiveness      |
| evm.model.Ga03G1126 | 646  | 8   | - | light responsiveness              |
| evm.model.Ga03G1126 | 350  | 6   | + | light responsiveness              |
| evm.model.Ga03G1126 | 667  | 6   | + | light responsiveness              |
| evm.model.Ga03G1126 | 812  | 6   | + | light responsiveness              |
| evm.model.Ga03G1126 | 52   | 13  | + | light responsiveness              |
| evm.model.Ga03G1126 | 340  | 6   | + | drought inducibility              |
| evm.model.Ga03G1126 | 1982 | 6   | - | drought inducibility              |



|                     |      |    |   |                                   |
|---------------------|------|----|---|-----------------------------------|
| evm.model.Ga03G1126 | 1234 | 7  | + | gibberellin responsiveness        |
| evm.model.Ga03G2503 | 550  | 7  | - | light responsiveness              |
| evm.model.Ga03G2503 | 1671 | 7  | - | light responsiveness              |
| evm.model.Ga03G2503 | 1918 | 10 | - | light responsiveness              |
| evm.model.Ga03G2503 | 1128 | 6  | + | low-temperature responsiveness    |
| evm.model.Ga03G2503 | 17   | 9  | + | light responsiveness              |
| evm.model.Ga03G2503 | 1668 | 7  | + | light responsiveness              |
| evm.model.Ga03G2503 | 1892 | 9  | - | light responsiveness              |
| evm.model.Ga03G2503 | 415  | 6  | + | light responsiveness              |
| evm.model.Ga03G2503 | 793  | 6  | + | light responsiveness              |
| evm.model.Ga03G2503 | 1083 | 6  | - | light responsiveness              |
| evm.model.Ga03G2503 | 1944 | 6  | - | light responsiveness              |
| evm.model.Ga03G2503 | 846  | 10 | - | light responsiveness              |
| evm.model.Ga03G2503 | 588  | 9  | - | salicylic acid responsiveness     |
| evm.model.Ga03G2503 | 870  | 9  | + | salicylic acid responsiveness     |
| evm.model.Ga03G2503 | 1711 | 6  | - | anaerobic induction               |
| evm.model.Ga03G2503 | 1854 | 6  | - | anaerobic induction               |
| evm.model.Ga03G2503 | 852  | 6  | + | light responsiveness              |
| evm.model.Ga03G2503 | 57   | 6  | - | auxin responsiveness              |
| evm.model.Ga03G2578 | 356  | 6  | + | drought inducibility              |
| evm.model.Ga03G2578 | 121  | 5  | + | MeJA responsiveness               |
| evm.model.Ga03G2578 | 216  | 5  | + | MeJA responsiveness               |
| evm.model.Ga03G2578 | 1246 | 10 | - | defense and stress responsiveness |
| evm.model.Ga03G2578 | 709  | 14 | + | light responsiveness              |
| evm.model.Ga03G2578 | 121  | 5  | - | MeJA responsiveness               |
| evm.model.Ga03G2578 | 216  | 5  | - | MeJA responsiveness               |
| evm.model.Ga03G2578 | 328  | 7  | + | light responsiveness              |
| evm.model.Ga03G2578 | 1963 | 6  | + | light responsiveness              |
| evm.model.Ga03G2578 | 1588 | 5  | + | abscisic acid responsiveness      |
| evm.model.Ga03G2578 | 700  | 6  | + | light responsiveness              |
| evm.model.Ga03G2578 | 1032 | 6  | - | light responsiveness              |
| evm.model.Ga03G2578 | 1218 | 6  | - | light responsiveness              |
| evm.model.Ga03G2578 | 905  | 8  | - | light responsiveness              |
| evm.model.Ga03G2578 | 1007 | 8  | + | light responsiveness              |
| evm.model.Ga03G2578 | 669  | 6  | + | anaerobic induction               |
| evm.model.Ga03G2578 | 1246 | 6  | - | light responsiveness              |
| evm.model.Ga03G2578 | 1727 | 8  | - | light responsiveness              |
| evm.model.Ga03G2578 | 1904 | 8  | - | light responsiveness              |
| evm.model.Ga03G2578 | 1587 | 6  | + | light responsiveness              |
| evm.model.Ga04G0296 | 205  | 9  | - | salicylic acid responsiveness     |

|                     |      |    |   |                                   |
|---------------------|------|----|---|-----------------------------------|
| evm.model.Ga04G0296 | 1020 | 6  | - | light responsiveness              |
| evm.model.Ga04G0296 | 171  | 6  | - | light responsiveness              |
| evm.model.Ga04G0296 | 880  | 6  | + | light responsiveness              |
| evm.model.Ga04G0296 | 1355 | 6  | - | light responsiveness              |
| evm.model.Ga04G0296 | 726  | 6  | - | light responsiveness              |
| evm.model.Ga04G0296 | 725  | 5  | + | MeJA responsiveness               |
| evm.model.Ga04G0296 | 1682 | 5  | + | MeJA responsiveness               |
| evm.model.Ga04G0296 | 229  | 9  | - | light responsiveness              |
| evm.model.Ga04G0296 | 727  | 5  | + | abscisic acid responsiveness      |
| evm.model.Ga04G0296 | 741  | 6  | + | light responsiveness              |
| evm.model.Ga04G0296 | 997  | 6  | + | light responsiveness              |
| evm.model.Ga04G0296 | 1612 | 8  | - | light responsiveness              |
| evm.model.Ga04G0296 | 110  | 6  | + | light responsiveness              |
| evm.model.Ga04G0296 | 260  | 6  | + | light responsiveness              |
| evm.model.Ga04G0296 | 747  | 6  | + | light responsiveness              |
| evm.model.Ga04G0296 | 904  | 6  | + | light responsiveness              |
| evm.model.Ga04G0296 | 911  | 6  | + | light responsiveness              |
| evm.model.Ga04G0296 | 609  | 8  | + | light responsiveness              |
| evm.model.Ga04G0296 | 1006 | 9  | - | defense and stress responsiveness |
| evm.model.Ga04G0296 | 1355 | 9  | - | defense and stress responsiveness |
| evm.model.Ga04G0296 | 725  | 5  | - | MeJA responsiveness               |
| evm.model.Ga04G0296 | 1682 | 5  | - | MeJA responsiveness               |
| evm.model.Ga04G1998 | 1275 | 6  | + | light responsiveness              |
| evm.model.Ga04G1998 | 1488 | 8  | + | light responsiveness              |
| evm.model.Ga04G1998 | 1686 | 8  | + | light responsiveness              |
| evm.model.Ga04G1998 | 1887 | 6  | - | auxin responsiveness              |
| evm.model.Ga04G1998 | 1193 | 6  | + | anaerobic induction               |
| evm.model.Ga04G1998 | 1592 | 6  | - | anaerobic induction               |
| evm.model.Ga04G1998 | 1553 | 8  | - | light responsiveness              |
| evm.model.Ga04G1998 | 564  | 6  | + | light responsiveness              |
| evm.model.Ga04G1998 | 1503 | 6  | - | light responsiveness              |
| evm.model.Ga04G1998 | 1087 | 6  | - | light responsiveness              |
| evm.model.Ga04G1998 | 877  | 7  | - | abscisic acid responsiveness      |
| evm.model.Ga04G1998 | 959  | 5  | - | MeJA responsiveness               |
| evm.model.Ga04G1998 | 959  | 5  | + | MeJA responsiveness               |
| evm.model.Ga05G2881 | 1781 | 5  | + | MeJA responsiveness               |
| evm.model.Ga05G2881 | 1957 | 5  | + | MeJA responsiveness               |
| evm.model.Ga05G2881 | 1873 | 7  | + | gibberellin responsiveness        |
| evm.model.Ga05G2881 | 1969 | 6  | + | low-temperature responsiveness    |
| evm.model.Ga05G2881 | 1765 | 13 | - | light responsiveness              |

|                     |      |     |   |                                   |
|---------------------|------|-----|---|-----------------------------------|
| evm.model.Ga05G2881 | 101  | 6   | + | light responsiveness              |
| evm.model.Ga05G2881 | 1095 | 6   | - | light responsiveness              |
| evm.model.Ga05G2881 | 1119 | 6   | - | light responsiveness              |
| evm.model.Ga05G2881 | 1778 | 8   | - | auxin responsiveness              |
| evm.model.Ga05G2881 | 1848 | 5   | + | abscisic acid responsiveness      |
| evm.model.Ga05G2881 | 1781 | 5   | - | MeJA responsiveness               |
| evm.model.Ga05G2881 | 1957 | 5   | - | MeJA responsiveness               |
| evm.model.Ga05G2881 | 797  | 10  | - | light responsiveness              |
| evm.model.Ga05G2881 | 1847 | 6   | + | light responsiveness              |
| evm.model.Ga05G2881 | 1612 | 6   | + | light responsiveness              |
| evm.model.Ga05G2881 | 1911 | 6   | + | light responsiveness              |
| evm.model.Ga05G2881 | 419  | 6   | + | anaerobic induction               |
| evm.model.Ga05G2881 | 1536 | 10  | + | light responsiveness              |
| evm.model.Ga05G2977 | 211  | 6   | + | light responsiveness              |
| evm.model.Ga05G2977 | 881  | 6   | + | light responsiveness              |
| evm.model.Ga05G2977 | 1013 | 6   | - | light responsiveness              |
| evm.model.Ga05G2977 | 1110 | 6   | - | light responsiveness              |
| evm.model.Ga05G2977 | 1125 | 6   | - | light responsiveness              |
| evm.model.Ga05G2977 | 1179 | 6   | - | light responsiveness              |
| evm.model.Ga05G2977 | 387  | 8   | + | light responsiveness              |
| evm.model.Ga05G2977 | 50   | 6   | + | abscisic acid responsiveness      |
| evm.model.Ga05G2977 | 51   | 5   | + | abscisic acid responsiveness      |
| evm.model.Ga05G2977 | 842  | 5   | - | abscisic acid responsiveness      |
| evm.model.Ga05G2977 | 333  | 5   | + | MeJA responsiveness               |
| evm.model.Ga05G2977 | 844  | 5   | - | MeJA responsiveness               |
| evm.model.Ga05G2977 | 50   | 6   | + | light responsiveness              |
| evm.model.Ga05G2977 | 842  | 6   | + | light responsiveness              |
| evm.model.Ga05G2977 | 1412 | 9.5 | - | light responsiveness              |
| evm.model.Ga05G2977 | 295  | 6   | - | anaerobic induction               |
| evm.model.Ga05G2977 | 1513 | 6   | - | anaerobic induction               |
| evm.model.Ga05G2977 | 1764 | 6   | + | anaerobic induction               |
| evm.model.Ga05G2977 | 50   | 6   | + | light responsiveness              |
| evm.model.Ga05G2977 | 103  | 10  | + | light responsiveness              |
| evm.model.Ga05G2977 | 333  | 5   | - | MeJA responsiveness               |
| evm.model.Ga05G2977 | 844  | 5   | + | MeJA responsiveness               |
| evm.model.Ga05G2977 | 1899 | 6   | + | low-temperature responsiveness    |
| evm.model.Ga05G2977 | 1312 | 9   | + | defense and stress responsiveness |
| evm.model.Ga06G2190 | 43   | 6   | + | drought inducibility              |
| evm.model.Ga06G2190 | 619  | 9   | + | light responsiveness              |
| evm.model.Ga06G2190 | 236  | 7   | - | auxin responsiveness              |

|                     |      |   |   |                                   |
|---------------------|------|---|---|-----------------------------------|
| evm.model.Ga06G2190 | 1985 | 7 | - | gibberellin responsiveness        |
| evm.model.Ga06G2190 | 1805 | 7 | - | light responsiveness              |
| evm.model.Ga06G2190 | 1806 | 6 | - | light responsiveness              |
| evm.model.Ga06G2190 | 640  | 6 | + | light responsiveness              |
| evm.model.Ga06G2190 | 1232 | 6 | - | light responsiveness              |
| evm.model.Ga06G2190 | 1245 | 6 | - | light responsiveness              |
| evm.model.Ga06G2190 | 1340 | 6 | - | light responsiveness              |
| evm.model.Ga06G2190 | 1785 | 6 | - | light responsiveness              |
| evm.model.Ga06G2190 | 971  | 6 | - | light responsiveness              |
| evm.model.Ga06G2190 | 960  | 6 | - | anaerobic induction               |
| evm.model.Ga06G2190 | 1205 | 6 | - | anaerobic induction               |
| evm.model.Ga06G2190 | 1086 | 6 | - | auxin responsiveness              |
| evm.model.Ga06G2190 | 1512 | 6 | + | auxin responsiveness              |
| evm.model.Ga06G2190 | 1291 | 9 | + | light responsiveness              |
| evm.model.Ga08G2367 | 199  | 6 | - | light responsiveness              |
| evm.model.Ga08G2367 | 358  | 9 | - | defense and stress responsiveness |
| evm.model.Ga08G2367 | 1047 | 6 | - | light responsiveness              |
| evm.model.Ga08G2367 | 1581 | 6 | - | light responsiveness              |
| evm.model.Ga08G2367 | 1664 | 6 | - | light responsiveness              |
| evm.model.Ga08G2367 | 200  | 5 | + | abscisic acid responsiveness      |
| evm.model.Ga08G2367 | 229  | 6 | + | light responsiveness              |
| evm.model.Ga08G2367 | 275  | 6 | + | light responsiveness              |
| evm.model.Ga08G2367 | 526  | 6 | + | light responsiveness              |
| evm.model.Ga08G2367 | 1385 | 6 | - | light responsiveness              |
| evm.model.Ga08G2367 | 1965 | 8 | - | light responsiveness              |
| evm.model.Ga08G2367 | 885  | 6 | - | light responsiveness              |
| evm.model.Ga08G2367 | 558  | 6 | + | anaerobic induction               |
| evm.model.Ga08G2367 | 674  | 6 | + | anaerobic induction               |
| evm.model.Ga08G2367 | 1818 | 6 | - | anaerobic induction               |
| evm.model.Ga09G2394 | 147  | 6 | + | light responsiveness              |
| evm.model.Ga09G2394 | 579  | 6 | + | light responsiveness              |
| evm.model.Ga09G2394 | 737  | 6 | + | light responsiveness              |
| evm.model.Ga09G2394 | 1373 | 6 | - | light responsiveness              |
| evm.model.Ga09G2394 | 1042 | 6 | + | light responsiveness              |
| evm.model.Ga09G2394 | 873  | 6 | + | anaerobic induction               |
| evm.model.Ga09G2394 | 1907 | 6 | - | anaerobic induction               |
| evm.model.Ga09G2394 | 1778 | 9 | + | salicylic acid responsiveness     |
| evm.model.Ga09G2394 | 1163 | 6 | - | light responsiveness              |
| evm.model.Ga09G2394 | 966  | 8 | + | light responsiveness              |
| evm.model.Ga09G2394 | 147  | 6 | + | abscisic acid responsiveness      |

|                     |      |     |   |                                |
|---------------------|------|-----|---|--------------------------------|
| evm.model.Ga09G2394 | 148  | 5   | + | abscisic acid responsiveness   |
| evm.model.Ga09G2394 | 580  | 5   | + | abscisic acid responsiveness   |
| evm.model.Ga09G2394 | 690  | 7   | + | abscisic acid responsiveness   |
| evm.model.Ga09G2394 | 737  | 5   | - | abscisic acid responsiveness   |
| evm.model.Ga09G2394 | 1366 | 5   | + | abscisic acid responsiveness   |
| evm.model.Ga09G2394 | 1373 | 5   | - | abscisic acid responsiveness   |
| evm.model.Ga09G2394 | 523  | 5   | + | MeJA responsiveness            |
| evm.model.Ga09G2394 | 763  | 5   | - | MeJA responsiveness            |
| evm.model.Ga09G2394 | 1062 | 5   | + | MeJA responsiveness            |
| evm.model.Ga09G2394 | 1450 | 7   | - | gibberellin responsiveness     |
| evm.model.Ga09G2394 | 1140 | 13  | - | light responsiveness           |
| evm.model.Ga09G2394 | 147  | 6   | + | light responsiveness           |
| evm.model.Ga09G2394 | 1365 | 6   | - | light responsiveness           |
| evm.model.Ga09G2394 | 523  | 5   | - | MeJA responsiveness            |
| evm.model.Ga09G2394 | 763  | 5   | + | MeJA responsiveness            |
| evm.model.Ga09G2394 | 1062 | 5   | - | MeJA responsiveness            |
| evm.model.Ga09G2394 | 827  | 6   | - | low-temperature responsiveness |
| evm.model.Ga09G2394 | 1969 | 6   | - | low-temperature responsiveness |
| evm.model.Ga10G0927 | 460  | 6   | + | light responsiveness           |
| evm.model.Ga10G0927 | 813  | 6   | + | light responsiveness           |
| evm.model.Ga10G0927 | 838  | 6   | + | light responsiveness           |
| evm.model.Ga10G0927 | 1401 | 6   | - | light responsiveness           |
| evm.model.Ga10G0927 | 1698 | 6   | - | light responsiveness           |
| evm.model.Ga10G0927 | 563  | 8   | + | light responsiveness           |
| evm.model.Ga10G0927 | 1312 | 6   | + | light responsiveness           |
| evm.model.Ga10G0927 | 731  | 9   | + | abscisic acid responsiveness   |
| evm.model.Ga10G0927 | 1755 | 8   | - | abscisic acid responsiveness   |
| evm.model.Ga10G0927 | 1757 | 5   | - | abscisic acid responsiveness   |
| evm.model.Ga10G0927 | 747  | 9   | - | salicylic acid responsiveness  |
| evm.model.Ga10G0927 | 1739 | 8   | + | light responsiveness           |
| evm.model.Ga10G0927 | 1757 | 6   | - | light responsiveness           |
| evm.model.Ga10G0927 | 1855 | 6   | - | auxin responsiveness           |
| evm.model.Ga10G0927 | 1755 | 9   | + | light responsiveness           |
| evm.model.Ga10G0927 | 821  | 7   | - | light responsiveness           |
| evm.model.Ga10G0927 | 1046 | 7   | + | auxin responsiveness           |
| evm.model.Ga10G1669 | 1773 | 9.5 | - | light responsiveness           |
| evm.model.Ga10G1669 | 489  | 9   | - | light responsiveness           |
| evm.model.Ga10G1669 | 1532 | 9   | - | wound responsiveness           |
| evm.model.Ga10G1669 | 1340 | 9   | + | salicylic acid responsiveness  |
| evm.model.Ga10G1669 | 1652 | 9   | - | salicylic acid responsiveness  |

|                     |      |    |   |                                |
|---------------------|------|----|---|--------------------------------|
| evm.model.Ga10G1669 | 1288 | 10 | + | light responsiveness           |
| evm.model.Ga10G1669 | 162  | 6  | - | anaerobic induction            |
| evm.model.Ga10G1669 | 264  | 6  | + | anaerobic induction            |
| evm.model.Ga10G1669 | 536  | 6  | + | anaerobic induction            |
| evm.model.Ga10G1669 | 950  | 6  | + | anaerobic induction            |
| evm.model.Ga10G1669 | 1785 | 6  | + | anaerobic induction            |
| evm.model.Ga10G1669 | 745  | 5  | - | abscisic acid responsiveness   |
| evm.model.Ga10G1669 | 136  | 6  | + | light responsiveness           |
| evm.model.Ga10G1669 | 447  | 6  | + | light responsiveness           |
| evm.model.Ga10G1669 | 1275 | 9  | + | light responsiveness           |
| evm.model.Ga10G1669 | 745  | 6  | + | light responsiveness           |
| evm.model.Ga11G0563 | 1323 | 6  | + | light responsiveness           |
| evm.model.Ga11G0563 | 1960 | 7  | - | light responsiveness           |
| evm.model.Ga11G0563 | 1961 | 6  | - | light responsiveness           |
| evm.model.Ga11G0563 | 215  | 5  | - | abscisic acid responsiveness   |
| evm.model.Ga11G0563 | 917  | 5  | + | abscisic acid responsiveness   |
| evm.model.Ga11G0563 | 1286 | 5  | - | abscisic acid responsiveness   |
| evm.model.Ga11G0563 | 822  | 7  | + | gibberellin responsiveness     |
| evm.model.Ga11G0563 | 510  | 6  | + | light responsiveness           |
| evm.model.Ga11G0563 | 644  | 6  | + | light responsiveness           |
| evm.model.Ga11G0563 | 1764 | 6  | - | light responsiveness           |
| evm.model.Ga11G0563 | 1768 | 6  | - | light responsiveness           |
| evm.model.Ga11G0563 | 1443 | 7  | + | light responsiveness           |
| evm.model.Ga11G0563 | 972  | 5  | + | MeJA responsiveness            |
| evm.model.Ga11G0563 | 1146 | 5  | + | MeJA responsiveness            |
| evm.model.Ga11G0563 | 916  | 6  | + | light responsiveness           |
| evm.model.Ga11G0563 | 1286 | 6  | - | light responsiveness           |
| evm.model.Ga11G0563 | 755  | 9  | + | salicylic acid responsiveness  |
| evm.model.Ga11G0563 | 798  | 9  | - | salicylic acid responsiveness  |
| evm.model.Ga11G0563 | 934  | 6  | - | anaerobic induction            |
| evm.model.Ga11G0563 | 140  | 9  | - | light responsiveness           |
| evm.model.Ga11G0563 | 972  | 5  | - | MeJA responsiveness            |
| evm.model.Ga11G0563 | 1146 | 5  | - | MeJA responsiveness            |
| evm.model.Ga11G0563 | 215  | 6  | + | light responsiveness           |
| evm.model.Ga11G0563 | 221  | 6  | + | low-temperature responsiveness |
| evm.model.Ga11G0563 | 248  | 13 | - | light responsiveness           |
| evm.model.Ga13G0339 | 935  | 6  | - | anaerobic induction            |
| evm.model.Ga13G0339 | 1520 | 6  | + | anaerobic induction            |
| evm.model.Ga13G0339 | 1571 | 6  | - | anaerobic induction            |
| evm.model.Ga13G0339 | 1866 | 6  | - | anaerobic induction            |

|                     |      |    |   |                                   |
|---------------------|------|----|---|-----------------------------------|
| evm.model.Ga13G0339 | 842  | 9  | + | wound responsiveness              |
| evm.model.Ga13G0339 | 1483 | 6  | - | light responsiveness              |
| evm.model.Ga13G0339 | 1200 | 6  | - | auxin responsiveness              |
| evm.model.Ga13G0339 | 1185 | 7  | - | light responsiveness              |
| evm.model.Ga13G0339 | 112  | 5  | - | MeJA responsiveness               |
| evm.model.Ga13G0339 | 987  | 6  | + | light responsiveness              |
| evm.model.Ga13G0339 | 1575 | 6  | - | light responsiveness              |
| evm.model.Ga13G0339 | 1352 | 9  | + | defense and stress responsiveness |
| evm.model.Ga13G0339 | 1303 | 8  | - | light responsiveness              |
| evm.model.Ga13G0339 | 509  | 6  | + | low-temperature responsiveness    |
| evm.model.Ga13G0339 | 112  | 5  | + | MeJA responsiveness               |
| evm.model.Ga13G1080 | 1473 | 8  | + | light responsiveness              |
| evm.model.Ga13G1080 | 128  | 5  | - | MeJA responsiveness               |
| evm.model.Ga13G1080 | 1946 | 9  | + | salicylic acid responsiveness     |
| evm.model.Ga13G1080 | 31   | 6  | - | anaerobic induction               |
| evm.model.Ga13G1080 | 653  | 6  | - | anaerobic induction               |
| evm.model.Ga13G1080 | 1201 | 6  | + | anaerobic induction               |
| evm.model.Ga13G1080 | 1979 | 6  | - | light responsiveness              |
| evm.model.Ga13G1080 | 1811 | 8  | - | light responsiveness              |
| evm.model.Ga13G1080 | 1380 | 6  | + | light responsiveness              |
| evm.model.Ga13G1080 | 1445 | 10 | + | light responsiveness              |
| evm.model.Ga13G1080 | 348  | 7  | - | gibberellin responsiveness        |
| evm.model.Ga13G1080 | 128  | 5  | + | MeJA responsiveness               |
| evm.model.Ga13G1080 | 1381 | 5  | + | abscisic acid responsiveness      |
| evm.model.Ga13G1080 | 132  | 7  | + | light responsiveness              |
| evm.model.Ga13G1080 | 1919 | 6  | + | light responsiveness              |
| evm.model.Ga13G1080 | 10   | 6  | + | light responsiveness              |
| evm.model.Ga13G1080 | 23   | 6  | + | light responsiveness              |
| evm.model.Ga13G1080 | 267  | 6  | + | light responsiveness              |
| evm.model.Ga13G1080 | 293  | 6  | + | light responsiveness              |
| evm.model.Ga13G1858 | 101  | 9  | - | defense and stress responsiveness |
| evm.model.Ga13G1858 | 1931 | 5  | - | MeJA responsiveness               |
| evm.model.Ga13G1858 | 1094 | 6  | - | light responsiveness              |
| evm.model.Ga13G1858 | 1465 | 6  | - | light responsiveness              |
| evm.model.Ga13G1858 | 367  | 6  | + | low-temperature responsiveness    |
| evm.model.Ga13G1858 | 1138 | 8  | + | light responsiveness              |
| evm.model.Ga13G1858 | 716  | 7  | - | light responsiveness              |
| evm.model.Ga13G1858 | 1094 | 6  | - | light responsiveness              |
| evm.model.Ga13G1858 | 1465 | 6  | - | light responsiveness              |
| evm.model.Ga13G1858 | 1859 | 6  | - | anaerobic induction               |

|                     |      |   |   |                                |
|---------------------|------|---|---|--------------------------------|
| evm.model.Ga13G1858 | 1917 | 6 | - | anaerobic induction            |
| evm.model.Ga13G1858 | 1094 | 6 | - | abscisic acid responsiveness   |
| evm.model.Ga13G1858 | 1095 | 5 | + | abscisic acid responsiveness   |
| evm.model.Ga13G1858 | 1465 | 6 | - | abscisic acid responsiveness   |
| evm.model.Ga13G1858 | 1466 | 5 | + | abscisic acid responsiveness   |
| evm.model.Ga13G1858 | 1344 | 6 | + | light responsiveness           |
| evm.model.Ga13G1858 | 215  | 6 | + | light responsiveness           |
| evm.model.Ga13G1858 | 859  | 6 | + | light responsiveness           |
| evm.model.Ga13G1858 | 1109 | 6 | - | light responsiveness           |
| evm.model.Ga13G1858 | 1700 | 6 | - | light responsiveness           |
| evm.model.Ga13G1858 | 1931 | 5 | + | MeJA responsiveness            |
| evm.model.Ga14G0186 | 319  | 5 | + | MeJA responsiveness            |
| evm.model.Ga14G0186 | 1197 | 9 | - | light responsiveness           |
| evm.model.Ga14G0186 | 1153 | 6 | - | light responsiveness           |
| evm.model.Ga14G0186 | 575  | 6 | + | low-temperature responsiveness |
| evm.model.Ga14G0186 | 966  | 6 | - | drought inducibility           |
| evm.model.Ga14G0186 | 906  | 7 | - | light responsiveness           |
| evm.model.Ga14G0186 | 513  | 6 | - | light responsiveness           |
| evm.model.Ga14G0186 | 603  | 6 | + | light responsiveness           |
| evm.model.Ga14G0186 | 1589 | 6 | - | light responsiveness           |
| evm.model.Ga14G0186 | 1151 | 8 | + | light responsiveness           |
| evm.model.Ga14G0186 | 1289 | 6 | - | anaerobic induction            |
| evm.model.Ga14G0186 | 1871 | 6 | - | anaerobic induction            |
| evm.model.Ga14G0186 | 1679 | 7 | + | gibberellin responsiveness     |
| evm.model.Ga14G0186 | 1577 | 6 | - | light responsiveness           |
| evm.model.Ga14G0186 | 1154 | 5 | + | abscisic acid responsiveness   |
| evm.model.Ga14G0186 | 316  | 8 | - | auxin responsiveness           |
| evm.model.Ga14G0186 | 22   | 6 | + | light responsiveness           |
| evm.model.Ga14G0186 | 43   | 6 | + | light responsiveness           |
| evm.model.Ga14G0186 | 132  | 6 | + | light responsiveness           |
| evm.model.Ga14G0186 | 143  | 6 | + | light responsiveness           |
| evm.model.Ga14G0186 | 359  | 6 | + | light responsiveness           |
| evm.model.Ga14G0186 | 319  | 5 | - | MeJA responsiveness            |



**Table S4b. cis elements in Gb RF2 genes**

|                   |      |    |   |                                |
|-------------------|------|----|---|--------------------------------|
| Gbar_A01G004970.1 | 68   | 6  | + | light responsiveness           |
| Gbar_A01G004970.1 | 314  | 6  | + | light responsiveness           |
| Gbar_A01G004970.1 | 516  | 6  | + | light responsiveness           |
| Gbar_A01G004970.1 | 586  | 6  | + | light responsiveness           |
| Gbar_A01G004970.1 | 607  | 6  | + | light responsiveness           |
| Gbar_A01G004970.1 | 627  | 6  | + | light responsiveness           |
| Gbar_A01G004970.1 | 769  | 6  | + | light responsiveness           |
| Gbar_A01G004970.1 | 1600 | 6  | - | light responsiveness           |
| Gbar_A01G004970.1 | 1122 | 7  | - | auxin responsiveness           |
| Gbar_A01G004970.1 | 1777 | 6  | - | light responsiveness           |
| Gbar_A01G004970.1 | 1600 | 6  | - | light responsiveness           |
| Gbar_A01G004970.1 | 1868 | 6  | - | light responsiveness           |
| Gbar_A01G004970.1 | 1006 | 7  | + | light responsiveness           |
| Gbar_A01G004970.1 | 329  | 6  | + | anaerobic induction            |
| Gbar_A01G004970.1 | 1038 | 6  | - | anaerobic induction            |
| Gbar_A01G004970.1 | 1600 | 6  | - | abscisic acid responsiveness   |
| Gbar_A01G004970.1 | 1601 | 5  | + | abscisic acid responsiveness   |
| Gbar_A02G001100.1 | 252  | 6  | + | light responsiveness           |
| Gbar_A02G001100.1 | 1005 | 5  | - | MeJA responsiveness            |
| Gbar_A02G001100.1 | 332  | 6  | + | light responsiveness           |
| Gbar_A02G001100.1 | 932  | 6  | + | light responsiveness           |
| Gbar_A02G001100.1 | 952  | 6  | + | light responsiveness           |
| Gbar_A02G001100.1 | 1253 | 6  | - | light responsiveness           |
| Gbar_A02G001100.1 | 1343 | 6  | - | light responsiveness           |
| Gbar_A02G001100.1 | 1498 | 6  | - | light responsiveness           |
| Gbar_A02G001100.1 | 1605 | 6  | - | light responsiveness           |
| Gbar_A02G001100.1 | 1005 | 5  | + | MeJA responsiveness            |
| Gbar_A02G001100.1 | 1725 | 9  | + | salicylic acid responsiveness  |
| Gbar_A02G001100.1 | 882  | 6  | - | auxin responsiveness           |
| Gbar_A02G001100.1 | 252  | 5  | - | abscisic acid responsiveness   |
| Gbar_A02G001100.1 | 834  | 6  | + | low-temperature responsiveness |
| Gbar_A02G001100.1 | 345  | 6  | - | light responsiveness           |
| Gbar_A02G001100.1 | 793  | 6  | + | light responsiveness           |
| Gbar_A02G001100.1 | 252  | 8  | - | light responsiveness           |
| Gbar_A02G006540.1 | 303  | 7  | - | light responsiveness           |
| Gbar_A02G006540.1 | 1959 | 10 | + | light responsiveness           |
| Gbar_A02G006540.1 | 864  | 5  | + | MeJA responsiveness            |
| Gbar_A02G006540.1 | 465  | 6  | - | light responsiveness           |
| Gbar_A02G006540.1 | 1705 | 6  | - | light responsiveness           |

|                   |      |     |   |                                   |
|-------------------|------|-----|---|-----------------------------------|
| Gbar_A02G006540.1 | 297  | 6   | - | auxin responsiveness              |
| Gbar_A02G006540.1 | 144  | 10  | + | light responsiveness              |
| Gbar_A02G006540.1 | 283  | 10  | - | light responsiveness              |
| Gbar_A02G006540.1 | 354  | 6   | - | light responsiveness              |
| Gbar_A02G006540.1 | 1465 | 6   | - | light responsiveness              |
| Gbar_A02G006540.1 | 1482 | 6   | + | light responsiveness              |
| Gbar_A02G006540.1 | 73   | 8   | + | light responsiveness              |
| Gbar_A02G006540.1 | 1937 | 9   | + | defense and stress responsiveness |
| Gbar_A02G006540.1 | 864  | 5   | - | MeJA responsiveness               |
| Gbar_A02G006540.1 | 1448 | 6   | + | light responsiveness              |
| Gbar_A02G006540.1 | 1548 | 6   | - | light responsiveness              |
| Gbar_A02G006540.1 | 1917 | 6   | + | light responsiveness              |
| Gbar_A02G006540.1 | 189  | 9   | - | light responsiveness              |
| Gbar_A02G006540.1 | 190  | 6   | + | light responsiveness              |
| Gbar_A02G006540.1 | 865  | 6   | - | light responsiveness              |
| Gbar_A02G006540.1 | 1463 | 8   | + | light responsiveness              |
| Gbar_A02G006540.1 | 191  | 5   | + | abscisic acid responsiveness      |
| Gbar_A02G006540.1 | 355  | 5   | + | abscisic acid responsiveness      |
| Gbar_A02G006540.1 | 866  | 5   | + | abscisic acid responsiveness      |
| Gbar_A02G006540.1 | 1466 | 5   | + | abscisic acid responsiveness      |
| Gbar_A02G006540.1 | 1482 | 5   | - | abscisic acid responsiveness      |
| Gbar_A02G006540.1 | 788  | 6   | - | drought inducibility              |
| Gbar_A03G009220.1 | 166  | 6   | + | light responsiveness              |
| Gbar_A03G009220.1 | 770  | 6   | - | light responsiveness              |
| Gbar_A03G009220.1 | 1225 | 6   | + | light responsiveness              |
| Gbar_A03G009220.1 | 1054 | 6   | - | auxin responsiveness              |
| Gbar_A03G009220.1 | 353  | 6   | + | light responsiveness              |
| Gbar_A03G009220.1 | 665  | 6   | + | light responsiveness              |
| Gbar_A03G009220.1 | 811  | 6   | + | light responsiveness              |
| Gbar_A03G009220.1 | 644  | 8   | - | light responsiveness              |
| Gbar_A03G009220.1 | 314  | 6   | - | light responsiveness              |
| Gbar_A03G009220.1 | 1953 | 9.5 | - | light responsiveness              |
| Gbar_A03G009220.1 | 55   | 13  | + | light responsiveness              |
| Gbar_A03G009220.1 | 1001 | 6   | - | anaerobic induction               |
| Gbar_A03G009220.1 | 1241 | 7   | + | gibberellin responsiveness        |
| Gbar_A03G009220.1 | 268  | 6   | - | light responsiveness              |
| Gbar_A03G009220.1 | 229  | 7   | - | light responsiveness              |
| Gbar_A03G009220.1 | 515  | 7   | + | light responsiveness              |
| Gbar_A03G009220.1 | 244  | 6   | - | light responsiveness              |
| Gbar_A03G009220.1 | 847  | 6   | + | light responsiveness              |

|                   |      |    |   |                                   |
|-------------------|------|----|---|-----------------------------------|
| Gbar_A03G009220.1 | 1697 | 6  | - | light responsiveness              |
| Gbar_A03G009220.1 | 343  | 6  | + | drought inducibility              |
| Gbar_A03G009220.1 | 1982 | 6  | - | drought inducibility              |
| Gbar_A03G009220.1 | 1242 | 10 | + | light responsiveness              |
| Gbar_A03G009220.1 | 244  | 5  | - | abscisic acid responsiveness      |
| Gbar_A03G009220.1 | 315  | 5  | + | abscisic acid responsiveness      |
| Gbar_A03G021150.1 | 1081 | 6  | - | light responsiveness              |
| Gbar_A03G021150.1 | 1944 | 6  | - | light responsiveness              |
| Gbar_A03G021150.1 | 545  | 7  | - | light responsiveness              |
| Gbar_A03G021150.1 | 1671 | 7  | - | light responsiveness              |
| Gbar_A03G021150.1 | 793  | 10 | - | light responsiveness              |
| Gbar_A03G021150.1 | 840  | 10 | - | light responsiveness              |
| Gbar_A03G021150.1 | 583  | 9  | - | salicylic acid responsiveness     |
| Gbar_A03G021150.1 | 864  | 9  | + | salicylic acid responsiveness     |
| Gbar_A03G021150.1 | 409  | 6  | + | light responsiveness              |
| Gbar_A03G021150.1 | 7    | 9  | + | light responsiveness              |
| Gbar_A03G021150.1 | 47   | 6  | - | auxin responsiveness              |
| Gbar_A03G021150.1 | 1668 | 7  | + | light responsiveness              |
| Gbar_A03G021150.1 | 1892 | 9  | - | light responsiveness              |
| Gbar_A03G021150.1 | 846  | 6  | + | light responsiveness              |
| Gbar_A03G021150.1 | 1126 | 6  | + | low-temperature responsiveness    |
| Gbar_A03G021150.1 | 690  | 6  | - | light responsiveness              |
| Gbar_A03G021150.1 | 1918 | 10 | - | light responsiveness              |
| Gbar_A03G021150.1 | 1711 | 6  | - | anaerobic induction               |
| Gbar_A03G021150.1 | 1854 | 6  | - | anaerobic induction               |
| Gbar_A03G021900.1 | 4    | 6  | + | light responsiveness              |
| Gbar_A03G021900.1 | 702  | 6  | + | light responsiveness              |
| Gbar_A03G021900.1 | 1030 | 6  | - | light responsiveness              |
| Gbar_A03G021900.1 | 1214 | 6  | - | light responsiveness              |
| Gbar_A03G021900.1 | 122  | 5  | - | MeJA responsiveness               |
| Gbar_A03G021900.1 | 217  | 5  | - | MeJA responsiveness               |
| Gbar_A03G021900.1 | 329  | 7  | + | light responsiveness              |
| Gbar_A03G021900.1 | 1964 | 6  | + | light responsiveness              |
| Gbar_A03G021900.1 | 1460 | 10 | + | light responsiveness              |
| Gbar_A03G021900.1 | 1242 | 9  | - | defense and stress responsiveness |
| Gbar_A03G021900.1 | 1728 | 8  | - | light responsiveness              |
| Gbar_A03G021900.1 | 1905 | 8  | - | light responsiveness              |
| Gbar_A03G021900.1 | 122  | 5  | + | MeJA responsiveness               |
| Gbar_A03G021900.1 | 217  | 5  | + | MeJA responsiveness               |
| Gbar_A03G021900.1 | 711  | 14 | + | light responsiveness              |

|                   |      |     |   |                                   |
|-------------------|------|-----|---|-----------------------------------|
| Gbar_A03G021900.1 | 671  | 6   | + | anaerobic induction               |
| Gbar_A03G021900.1 | 1588 | 6   | + | light responsiveness              |
| Gbar_A03G021900.1 | 1589 | 5   | + | abscisic acid responsiveness      |
| Gbar_A03G021900.1 | 357  | 6   | + | drought inducibility              |
| Gbar_A05G026560.1 | 1781 | 5   | + | MeJA responsiveness               |
| Gbar_A05G026560.1 | 1957 | 5   | + | MeJA responsiveness               |
| Gbar_A05G026560.1 | 1765 | 13  | - | light responsiveness              |
| Gbar_A05G026560.1 | 1778 | 8   | - | auxin responsiveness              |
| Gbar_A05G026560.1 | 101  | 6   | + | light responsiveness              |
| Gbar_A05G026560.1 | 1095 | 6   | - | light responsiveness              |
| Gbar_A05G026560.1 | 1119 | 6   | - | light responsiveness              |
| Gbar_A05G026560.1 | 1781 | 5   | - | MeJA responsiveness               |
| Gbar_A05G026560.1 | 1957 | 5   | - | MeJA responsiveness               |
| Gbar_A05G026560.1 | 797  | 10  | - | light responsiveness              |
| Gbar_A05G026560.1 | 1199 | 6   | + | drought inducibility              |
| Gbar_A05G026560.1 | 1848 | 5   | + | abscisic acid responsiveness      |
| Gbar_A05G026560.1 | 1536 | 10  | + | light responsiveness              |
| Gbar_A05G026560.1 | 419  | 6   | + | anaerobic induction               |
| Gbar_A05G026560.1 | 1847 | 6   | + | light responsiveness              |
| Gbar_A05G026560.1 | 1612 | 6   | + | light responsiveness              |
| Gbar_A05G026560.1 | 1911 | 6   | + | light responsiveness              |
| Gbar_A05G026560.1 | 1969 | 6   | + | low-temperature responsiveness    |
| Gbar_A05G027450.1 | 752  | 5   | - | abscisic acid responsiveness      |
| Gbar_A05G027450.1 | 1420 | 9   | - | circadian control                 |
| Gbar_A05G027450.1 | 752  | 6   | + | light responsiveness              |
| Gbar_A05G027450.1 | 203  | 6   | - | anaerobic induction               |
| Gbar_A05G027450.1 | 1532 | 6   | - | anaerobic induction               |
| Gbar_A05G027450.1 | 1764 | 6   | + | anaerobic induction               |
| Gbar_A05G027450.1 | 1899 | 6   | + | low-temperature responsiveness    |
| Gbar_A05G027450.1 | 1488 | 7   | - | gibberellin responsiveness        |
| Gbar_A05G027450.1 | 241  | 5   | - | MeJA responsiveness               |
| Gbar_A05G027450.1 | 754  | 5   | + | MeJA responsiveness               |
| Gbar_A05G027450.1 | 1474 | 8   | + | light responsiveness              |
| Gbar_A05G027450.1 | 1325 | 9.5 | - | light responsiveness              |
| Gbar_A05G027450.1 | 295  | 8   | + | light responsiveness              |
| Gbar_A05G027450.1 | 12   | 10  | + | light responsiveness              |
| Gbar_A05G027450.1 | 1222 | 9   | + | defense and stress responsiveness |
| Gbar_A05G027450.1 | 241  | 5   | + | MeJA responsiveness               |
| Gbar_A05G027450.1 | 754  | 5   | - | MeJA responsiveness               |
| Gbar_A05G027450.1 | 119  | 6   | + | light responsiveness              |

|                   |      |    |   |                                   |
|-------------------|------|----|---|-----------------------------------|
| Gbar_A05G027450.1 | 791  | 6  | + | light responsiveness              |
| Gbar_A05G027450.1 | 923  | 6  | + | light responsiveness              |
| Gbar_A05G027450.1 | 1020 | 6  | - | light responsiveness              |
| Gbar_A05G027450.1 | 1035 | 6  | - | light responsiveness              |
| Gbar_A05G027450.1 | 1090 | 6  | - | light responsiveness              |
| Gbar_A05G040630.1 | 890  | 7  | - | abscisic acid responsiveness      |
| Gbar_A05G040630.1 | 1291 | 6  | + | light responsiveness              |
| Gbar_A05G040630.1 | 1206 | 6  | + | anaerobic induction               |
| Gbar_A05G040630.1 | 1592 | 6  | - | anaerobic induction               |
| Gbar_A05G040630.1 | 1369 | 13 | - | light responsiveness              |
| Gbar_A05G040630.1 | 972  | 5  | + | MeJA responsiveness               |
| Gbar_A05G040630.1 | 1486 | 8  | + | light responsiveness              |
| Gbar_A05G040630.1 | 1686 | 8  | + | light responsiveness              |
| Gbar_A05G040630.1 | 1553 | 8  | - | light responsiveness              |
| Gbar_A05G040630.1 | 1287 | 9  | + | defense and stress responsiveness |
| Gbar_A05G040630.1 | 972  | 5  | - | MeJA responsiveness               |
| Gbar_A05G040630.1 | 575  | 6  | + | light responsiveness              |
| Gbar_A05G040630.1 | 1501 | 6  | - | light responsiveness              |
| Gbar_A05G040630.1 | 1887 | 6  | - | auxin responsiveness              |
| Gbar_A05G040630.1 | 1100 | 6  | - | light responsiveness              |
| Gbar_A06G019370.1 | 638  | 9  | + | light responsiveness              |
| Gbar_A06G019370.1 | 1105 | 6  | - | auxin responsiveness              |
| Gbar_A06G019370.1 | 1510 | 6  | + | auxin responsiveness              |
| Gbar_A06G019370.1 | 1805 | 7  | - | light responsiveness              |
| Gbar_A06G019370.1 | 1806 | 6  | - | light responsiveness              |
| Gbar_A06G019370.1 | 659  | 6  | + | light responsiveness              |
| Gbar_A06G019370.1 | 1251 | 6  | - | light responsiveness              |
| Gbar_A06G019370.1 | 1264 | 6  | - | light responsiveness              |
| Gbar_A06G019370.1 | 1785 | 6  | - | light responsiveness              |
| Gbar_A06G019370.1 | 256  | 7  | - | auxin responsiveness              |
| Gbar_A06G019370.1 | 990  | 6  | - | light responsiveness              |
| Gbar_A06G019370.1 | 979  | 6  | - | anaerobic induction               |
| Gbar_A06G019370.1 | 1224 | 6  | - | anaerobic induction               |
| Gbar_A06G019370.1 | 1985 | 7  | - | gibberellin responsiveness        |
| Gbar_A06G019370.1 | 1304 | 9  | + | light responsiveness              |
| Gbar_A06G019370.1 | 63   | 6  | + | drought inducibility              |
| Gbar_A07G025540.1 | 40   | 5  | + | MeJA responsiveness               |
| Gbar_A07G025540.1 | 1931 | 5  | + | MeJA responsiveness               |
| Gbar_A07G025540.1 | 261  | 6  | + | light responsiveness              |
| Gbar_A07G025540.1 | 888  | 6  | + | light responsiveness              |

|                   |      |    |   |                                |
|-------------------|------|----|---|--------------------------------|
| Gbar_A07G025540.1 | 1700 | 6  | - | light responsiveness           |
| Gbar_A07G025540.1 | 1342 | 6  | + | light responsiveness           |
| Gbar_A07G025540.1 | 1137 | 8  | + | light responsiveness           |
| Gbar_A07G025540.1 | 40   | 5  | - | MeJA responsiveness            |
| Gbar_A07G025540.1 | 1931 | 5  | - | MeJA responsiveness            |
| Gbar_A07G025540.1 | 1093 | 6  | - | light responsiveness           |
| Gbar_A07G025540.1 | 1464 | 6  | - | light responsiveness           |
| Gbar_A07G025540.1 | 413  | 6  | + | low-temperature responsiveness |
| Gbar_A07G025540.1 | 1093 | 6  | - | light responsiveness           |
| Gbar_A07G025540.1 | 1464 | 6  | - | light responsiveness           |
| Gbar_A07G025540.1 | 764  | 7  | - | light responsiveness           |
| Gbar_A07G025540.1 | 1859 | 6  | - | anaerobic induction            |
| Gbar_A07G025540.1 | 1917 | 6  | - | anaerobic induction            |
| Gbar_A07G025540.1 | 1093 | 6  | - | abscisic acid responsiveness   |
| Gbar_A07G025540.1 | 1094 | 5  | + | abscisic acid responsiveness   |
| Gbar_A07G025540.1 | 1464 | 6  | - | abscisic acid responsiveness   |
| Gbar_A07G025540.1 | 1465 | 5  | + | abscisic acid responsiveness   |
| Gbar_A09G022230.1 | 1146 | 13 | - | light responsiveness           |
| Gbar_A09G022230.1 | 1777 | 9  | + | salicylic acid responsiveness  |
| Gbar_A09G022230.1 | 768  | 5  | - | MeJA responsiveness            |
| Gbar_A09G022230.1 | 1068 | 5  | + | MeJA responsiveness            |
| Gbar_A09G022230.1 | 2    | 5  | + | abscisic acid responsiveness   |
| Gbar_A09G022230.1 | 585  | 5  | + | abscisic acid responsiveness   |
| Gbar_A09G022230.1 | 695  | 7  | + | abscisic acid responsiveness   |
| Gbar_A09G022230.1 | 742  | 5  | - | abscisic acid responsiveness   |
| Gbar_A09G022230.1 | 1378 | 5  | - | abscisic acid responsiveness   |
| Gbar_A09G022230.1 | 584  | 6  | + | light responsiveness           |
| Gbar_A09G022230.1 | 742  | 6  | + | light responsiveness           |
| Gbar_A09G022230.1 | 1378 | 6  | - | light responsiveness           |
| Gbar_A09G022230.1 | 91   | 6  | + | anoxic specific inducibility   |
| Gbar_A09G022230.1 | 1    | 6  | - | light responsiveness           |
| Gbar_A09G022230.1 | 971  | 8  | + | light responsiveness           |
| Gbar_A09G022230.1 | 768  | 5  | + | MeJA responsiveness            |
| Gbar_A09G022230.1 | 1068 | 5  | - | MeJA responsiveness            |
| Gbar_A09G022230.1 | 1169 | 6  | - | light responsiveness           |
| Gbar_A09G022230.1 | 1454 | 7  | - | gibberellin responsiveness     |
| Gbar_A09G022230.1 | 878  | 6  | + | anaerobic induction            |
| Gbar_A09G022230.1 | 1907 | 6  | - | anaerobic induction            |
| Gbar_A09G022230.1 | 832  | 6  | - | low-temperature responsiveness |
| Gbar_A09G022230.1 | 1969 | 6  | - | low-temperature responsiveness |

|                   |      |     |   |                               |
|-------------------|------|-----|---|-------------------------------|
| Gbar_A09G022230.1 | 1048 | 6   | + | light responsiveness          |
| Gbar_A10G014980.1 | 256  | 6   | - | anaerobic induction           |
| Gbar_A10G014980.1 | 359  | 6   | + | anaerobic induction           |
| Gbar_A10G014980.1 | 631  | 6   | + | anaerobic induction           |
| Gbar_A10G014980.1 | 1789 | 6   | + | anaerobic induction           |
| Gbar_A10G014980.1 | 1536 | 9   | - | wound responsiveness          |
| Gbar_A10G014980.1 | 751  | 8   | + | light responsiveness          |
| Gbar_A10G014980.1 | 1293 | 10  | + | light responsiveness          |
| Gbar_A10G014980.1 | 1280 | 9   | + | light responsiveness          |
| Gbar_A10G014980.1 | 842  | 6   | + | light responsiveness          |
| Gbar_A10G014980.1 | 1025 | 6   | + | light responsiveness          |
| Gbar_A10G014980.1 | 1345 | 9   | + | salicylic acid responsiveness |
| Gbar_A10G014980.1 | 1656 | 9   | - | salicylic acid responsiveness |
| Gbar_A10G014980.1 | 230  | 6   | + | light responsiveness          |
| Gbar_A10G014980.1 | 542  | 6   | + | light responsiveness          |
| Gbar_A10G014980.1 | 1777 | 9.5 | - | light responsiveness          |
| Gbar_A10G019270.1 | 559  | 8   | + | light responsiveness          |
| Gbar_A10G019270.1 | 456  | 6   | + | light responsiveness          |
| Gbar_A10G019270.1 | 813  | 6   | + | light responsiveness          |
| Gbar_A10G019270.1 | 838  | 6   | + | light responsiveness          |
| Gbar_A10G019270.1 | 1401 | 6   | - | light responsiveness          |
| Gbar_A10G019270.1 | 1698 | 6   | - | light responsiveness          |
| Gbar_A10G019270.1 | 821  | 7   | - | light responsiveness          |
| Gbar_A10G019270.1 | 1855 | 6   | - | auxin responsiveness          |
| Gbar_A10G019270.1 | 1312 | 6   | + | light responsiveness          |
| Gbar_A10G019270.1 | 747  | 9   | - | salicylic acid responsiveness |
| Gbar_A10G019270.1 | 731  | 9   | + | abscisic acid responsiveness  |
| Gbar_A10G019270.1 | 1755 | 8   | - | abscisic acid responsiveness  |
| Gbar_A10G019270.1 | 1757 | 5   | - | abscisic acid responsiveness  |
| Gbar_A10G019270.1 | 1739 | 8   | + | light responsiveness          |
| Gbar_A10G019270.1 | 1755 | 9   | + | light responsiveness          |
| Gbar_A10G019270.1 | 1757 | 6   | - | light responsiveness          |
| Gbar_A11G030850.1 | 1450 | 7   | + | light responsiveness          |
| Gbar_A11G030850.1 | 1723 | 7   | + | light responsiveness          |
| Gbar_A11G030850.1 | 214  | 6   | + | drought inducibility          |
| Gbar_A11G030850.1 | 222  | 5   | - | abscisic acid responsiveness  |
| Gbar_A11G030850.1 | 924  | 5   | + | abscisic acid responsiveness  |
| Gbar_A11G030850.1 | 1034 | 6   | - | abscisic acid responsiveness  |
| Gbar_A11G030850.1 | 1035 | 5   | + | abscisic acid responsiveness  |
| Gbar_A11G030850.1 | 941  | 6   | - | anaerobic induction           |

|                   |      |    |   |                                   |
|-------------------|------|----|---|-----------------------------------|
| Gbar_A11G030850.1 | 923  | 6  | + | light responsiveness              |
| Gbar_A11G030850.1 | 1033 | 8  | - | light responsiveness              |
| Gbar_A11G030850.1 | 1034 | 6  | - | light responsiveness              |
| Gbar_A11G030850.1 | 222  | 6  | + | light responsiveness              |
| Gbar_A11G030850.1 | 1034 | 6  | - | light responsiveness              |
| Gbar_A11G030850.1 | 1153 | 5  | - | MeJA responsiveness               |
| Gbar_A11G030850.1 | 255  | 13 | - | light responsiveness              |
| Gbar_A11G030850.1 | 762  | 9  | + | salicylic acid responsiveness     |
| Gbar_A11G030850.1 | 1960 | 7  | - | light responsiveness              |
| Gbar_A11G030850.1 | 1961 | 6  | - | light responsiveness              |
| Gbar_A11G030850.1 | 147  | 9  | - | light responsiveness              |
| Gbar_A11G030850.1 | 517  | 6  | + | light responsiveness              |
| Gbar_A11G030850.1 | 651  | 6  | + | light responsiveness              |
| Gbar_A11G030850.1 | 1762 | 6  | - | light responsiveness              |
| Gbar_A11G030850.1 | 1766 | 6  | - | light responsiveness              |
| Gbar_A11G030850.1 | 1153 | 5  | + | MeJA responsiveness               |
| Gbar_A12G002500.1 | 520  | 6  | - | light responsiveness              |
| Gbar_A12G002500.1 | 610  | 6  | + | light responsiveness              |
| Gbar_A12G002500.1 | 1596 | 6  | - | light responsiveness              |
| Gbar_A12G002500.1 | 1686 | 7  | + | gibberellin responsiveness        |
| Gbar_A12G002500.1 | 913  | 7  | - | light responsiveness              |
| Gbar_A12G002500.1 | 1158 | 8  | + | light responsiveness              |
| Gbar_A12G002500.1 | 1296 | 6  | - | anaerobic induction               |
| Gbar_A12G002500.1 | 1871 | 6  | - | anaerobic induction               |
| Gbar_A12G002500.1 | 1161 | 5  | + | abscisic acid responsiveness      |
| Gbar_A12G002500.1 | 973  | 6  | - | drought inducibility              |
| Gbar_A12G002500.1 | 326  | 5  | - | MeJA responsiveness               |
| Gbar_A12G002500.1 | 28   | 6  | + | light responsiveness              |
| Gbar_A12G002500.1 | 49   | 6  | + | light responsiveness              |
| Gbar_A12G002500.1 | 139  | 6  | + | light responsiveness              |
| Gbar_A12G002500.1 | 150  | 6  | + | light responsiveness              |
| Gbar_A12G002500.1 | 366  | 6  | + | light responsiveness              |
| Gbar_A12G002500.1 | 323  | 8  | - | auxin responsiveness              |
| Gbar_A12G002500.1 | 1584 | 6  | - | light responsiveness              |
| Gbar_A12G002500.1 | 1204 | 9  | - | light responsiveness              |
| Gbar_A12G002500.1 | 326  | 5  | + | MeJA responsiveness               |
| Gbar_A12G002500.1 | 1160 | 6  | - | light responsiveness              |
| Gbar_A13G003620.1 | 117  | 5  | + | MeJA responsiveness               |
| Gbar_A13G003620.1 | 1353 | 9  | + | defense and stress responsiveness |
| Gbar_A13G003620.1 | 1304 | 8  | - | light responsiveness              |



|                   |      |    |   |                                |
|-------------------|------|----|---|--------------------------------|
| Gbar_A13G003620.1 | 1201 | 6  | - | auxin responsiveness           |
| Gbar_A13G003620.1 | 1575 | 6  | - | light responsiveness           |
| Gbar_A13G003620.1 | 117  | 5  | - | MeJA responsiveness            |
| Gbar_A13G003620.1 | 988  | 6  | + | light responsiveness           |
| Gbar_A13G003620.1 | 843  | 9  | + | wound responsiveness           |
| Gbar_A13G003620.1 | 1484 | 6  | - | light responsiveness           |
| Gbar_A13G003620.1 | 1726 | 9  | - | light responsiveness           |
| Gbar_A13G003620.1 | 1186 | 7  | - | light responsiveness           |
| Gbar_A13G003620.1 | 936  | 6  | - | anaerobic induction            |
| Gbar_A13G003620.1 | 1521 | 6  | + | anaerobic induction            |
| Gbar_A13G003620.1 | 1571 | 6  | - | anaerobic induction            |
| Gbar_A13G003620.1 | 1866 | 6  | - | anaerobic induction            |
| Gbar_A13G003620.1 | 514  | 6  | + | low-temperature responsiveness |
| Gbar_A13G009350.1 | 1946 | 9  | + | salicylic acid responsiveness  |
| Gbar_A13G009350.1 | 135  | 7  | + | light responsiveness           |
| Gbar_A13G009350.1 | 1919 | 6  | + | light responsiveness           |
| Gbar_A13G009350.1 | 967  | 9  | + | light responsiveness           |
| Gbar_A13G009350.1 | 131  | 5  | + | MeJA responsiveness            |
| Gbar_A13G009350.1 | 14   | 6  | + | light responsiveness           |
| Gbar_A13G009350.1 | 27   | 6  | + | light responsiveness           |
| Gbar_A13G009350.1 | 270  | 6  | + | light responsiveness           |
| Gbar_A13G009350.1 | 290  | 6  | + | light responsiveness           |
| Gbar_A13G009350.1 | 793  | 6  | + | light responsiveness           |
| Gbar_A13G009350.1 | 131  | 5  | - | MeJA responsiveness            |
| Gbar_A13G009350.1 | 1810 | 8  | - | light responsiveness           |
| Gbar_A13G009350.1 | 1475 | 8  | + | light responsiveness           |
| Gbar_A13G009350.1 | 1729 | 8  | + | light responsiveness           |
| Gbar_A13G009350.1 | 1380 | 6  | + | light responsiveness           |
| Gbar_A13G009350.1 | 35   | 6  | - | anaerobic induction            |
| Gbar_A13G009350.1 | 652  | 6  | - | anaerobic induction            |
| Gbar_A13G009350.1 | 1201 | 6  | + | anaerobic induction            |
| Gbar_A13G009350.1 | 345  | 7  | - | gibberellin responsiveness     |
| Gbar_A13G009350.1 | 1979 | 6  | - | light responsiveness           |
| Gbar_A13G009350.1 | 1445 | 10 | + | light responsiveness           |
| Gbar_A13G009350.1 | 1381 | 5  | + | abscisic acid responsiveness   |
| Gbar_D01G005120.1 | 394  | 6  | + | anaerobic induction            |
| Gbar_D01G005120.1 | 1047 | 6  | - | anaerobic induction            |
| Gbar_D01G005120.1 | 1608 | 6  | - | light responsiveness           |
| Gbar_D01G005120.1 | 1870 | 6  | - | light responsiveness           |
| Gbar_D01G005120.1 | 1015 | 7  | + | light responsiveness           |

|                   |      |    |   |                                |
|-------------------|------|----|---|--------------------------------|
| Gbar_D01G005120.1 | 1127 | 7  | - | gibberellin responsiveness     |
| Gbar_D01G005120.1 | 449  | 6  | + | light responsiveness           |
| Gbar_D01G005120.1 | 559  | 5  | + | abscisic acid responsiveness   |
| Gbar_D01G005120.1 | 1608 | 6  | - | abscisic acid responsiveness   |
| Gbar_D01G005120.1 | 1609 | 5  | + | abscisic acid responsiveness   |
| Gbar_D01G005120.1 | 312  | 6  | + | auxin responsiveness           |
| Gbar_D01G005120.1 | 213  | 6  | - | light responsiveness           |
| Gbar_D01G005120.1 | 149  | 6  | + | light responsiveness           |
| Gbar_D01G005120.1 | 283  | 6  | + | light responsiveness           |
| Gbar_D01G005120.1 | 379  | 6  | + | light responsiveness           |
| Gbar_D01G005120.1 | 583  | 6  | + | light responsiveness           |
| Gbar_D01G005120.1 | 785  | 6  | + | light responsiveness           |
| Gbar_D01G005120.1 | 827  | 6  | + | light responsiveness           |
| Gbar_D01G005120.1 | 9    | 7  | + | light responsiveness           |
| Gbar_D01G005120.1 | 131  | 5  | + | MeJA responsiveness            |
| Gbar_D01G005120.1 | 657  | 13 | + | light responsiveness           |
| Gbar_D01G005120.1 | 558  | 6  | - | light responsiveness           |
| Gbar_D01G005120.1 | 1608 | 6  | - | light responsiveness           |
| Gbar_D01G005120.1 | 131  | 5  | - | MeJA responsiveness            |
| Gbar_D02G001400.1 | 390  | 6  | + | abscisic acid responsiveness   |
| Gbar_D02G001400.1 | 391  | 5  | + | abscisic acid responsiveness   |
| Gbar_D02G001400.1 | 584  | 10 | + | light responsiveness           |
| Gbar_D02G001400.1 | 906  | 6  | + | low-temperature responsiveness |
| Gbar_D02G001400.1 | 872  | 6  | + | light responsiveness           |
| Gbar_D02G001400.1 | 1346 | 6  | - | light responsiveness           |
| Gbar_D02G001400.1 | 390  | 6  | + | light responsiveness           |
| Gbar_D02G001400.1 | 11   | 5  | + | MeJA responsiveness            |
| Gbar_D02G001400.1 | 1049 | 5  | - | MeJA responsiveness            |
| Gbar_D02G001400.1 | 1928 | 8  | - | light responsiveness           |
| Gbar_D02G001400.1 | 1386 | 8  | + | light responsiveness           |
| Gbar_D02G001400.1 | 390  | 6  | + | light responsiveness           |
| Gbar_D02G001400.1 | 11   | 5  | - | MeJA responsiveness            |
| Gbar_D02G001400.1 | 1049 | 5  | + | MeJA responsiveness            |
| Gbar_D02G001400.1 | 1    | 6  | + | light responsiveness           |
| Gbar_D02G001400.1 | 42   | 6  | + | light responsiveness           |
| Gbar_D02G001400.1 | 67   | 6  | + | light responsiveness           |
| Gbar_D02G001400.1 | 1002 | 6  | - | light responsiveness           |
| Gbar_D02G001400.1 | 1022 | 6  | - | light responsiveness           |
| Gbar_D02G001400.1 | 1295 | 6  | - | light responsiveness           |
| Gbar_D02G001400.1 | 1513 | 6  | - | light responsiveness           |

|                   |      |    |   |                                   |
|-------------------|------|----|---|-----------------------------------|
| Gbar_D02G001400.1 | 1619 | 6  | - | light responsiveness              |
| Gbar_D02G001400.1 | 76   | 6  | - | light responsiveness              |
| Gbar_D02G001400.1 | 568  | 6  | + | light responsiveness              |
| Gbar_D02G001400.1 | 1741 | 9  | + | salicylic acid responsiveness     |
| Gbar_D02G001400.1 | 242  | 6  | - | auxin responsiveness              |
| Gbar_D02G007490.1 | 868  | 5  | + | MeJA responsiveness               |
| Gbar_D02G007490.1 | 517  | 6  | + | light responsiveness              |
| Gbar_D02G007490.1 | 564  | 6  | + | light responsiveness              |
| Gbar_D02G007490.1 | 1959 | 10 | + | light responsiveness              |
| Gbar_D02G007490.1 | 298  | 6  | - | auxin responsiveness              |
| Gbar_D02G007490.1 | 868  | 5  | - | MeJA responsiveness               |
| Gbar_D02G007490.1 | 490  | 13 | + | light responsiveness              |
| Gbar_D02G007490.1 | 287  | 6  | + | light responsiveness              |
| Gbar_D02G007490.1 | 1401 | 6  | + | light responsiveness              |
| Gbar_D02G007490.1 | 1937 | 9  | + | defense and stress responsiveness |
| Gbar_D02G007490.1 | 1453 | 6  | + | light responsiveness              |
| Gbar_D02G007490.1 | 1917 | 6  | + | light responsiveness              |
| Gbar_D02G007490.1 | 1591 | 7  | - | gibberellin responsiveness        |
| Gbar_D02G007490.1 | 284  | 11 | + | light responsiveness              |
| Gbar_D02G007490.1 | 287  | 6  | + | light responsiveness              |
| Gbar_D02G007490.1 | 869  | 6  | - | light responsiveness              |
| Gbar_D02G007490.1 | 1106 | 10 | - | light responsiveness              |
| Gbar_D02G007490.1 | 1631 | 9  | + | light responsiveness              |
| Gbar_D02G007490.1 | 285  | 9  | - | abscisic acid responsiveness      |
| Gbar_D02G007490.1 | 287  | 6  | + | abscisic acid responsiveness      |
| Gbar_D02G007490.1 | 288  | 5  | + | abscisic acid responsiveness      |
| Gbar_D02G007490.1 | 870  | 5  | + | abscisic acid responsiveness      |
| Gbar_D02G007490.1 | 1401 | 5  | - | abscisic acid responsiveness      |
| Gbar_D02G007490.1 | 1595 | 9  | - | wound responsiveness              |
| Gbar_D02G007490.1 | 244  | 6  | + | drought inducibility              |
| Gbar_D02G007490.1 | 792  | 6  | - | drought inducibility              |
| Gbar_D02G010420.1 | 398  | 5  | + | abscisic acid responsiveness      |
| Gbar_D02G010420.1 | 1495 | 6  | + | drought inducibility              |
| Gbar_D02G010420.1 | 1983 | 6  | - | drought inducibility              |
| Gbar_D02G010420.1 | 830  | 6  | + | light responsiveness              |
| Gbar_D02G010420.1 | 1699 | 6  | - | light responsiveness              |
| Gbar_D02G010420.1 | 1269 | 7  | + | gibberellin responsiveness        |
| Gbar_D02G010420.1 | 1340 | 6  | + | anaerobic induction               |
| Gbar_D02G010420.1 | 234  | 7  | - | light responsiveness              |
| Gbar_D02G010420.1 | 643  | 8  | - | light responsiveness              |

|                   |      |     |   |                                |
|-------------------|------|-----|---|--------------------------------|
| Gbar_D02G010420.1 | 397  | 6   | - | light responsiveness           |
| Gbar_D02G010420.1 | 1938 | 8   | - | light responsiveness           |
| Gbar_D02G010420.1 | 248  | 5   | - | MeJA responsiveness            |
| Gbar_D02G010420.1 | 1954 | 9.5 | - | light responsiveness           |
| Gbar_D02G010420.1 | 248  | 5   | + | MeJA responsiveness            |
| Gbar_D02G010420.1 | 1253 | 6   | + | light responsiveness           |
| Gbar_D02G010420.1 | 1897 | 6   | - | light responsiveness           |
| Gbar_D02G010420.1 | 248  | 8   | + | auxin responsiveness           |
| Gbar_D02G023090.1 | 151  | 5   | + | MeJA responsiveness            |
| Gbar_D02G023090.1 | 46   | 6   | - | auxin responsiveness           |
| Gbar_D02G023090.1 | 579  | 9   | - | salicylic acid responsiveness  |
| Gbar_D02G023090.1 | 863  | 9   | + | salicylic acid responsiveness  |
| Gbar_D02G023090.1 | 9    | 6   | - | light responsiveness           |
| Gbar_D02G023090.1 | 839  | 10  | - | light responsiveness           |
| Gbar_D02G023090.1 | 539  | 7   | - | light responsiveness           |
| Gbar_D02G023090.1 | 1671 | 7   | - | light responsiveness           |
| Gbar_D02G023090.1 | 1944 | 6   | - | light responsiveness           |
| Gbar_D02G023090.1 | 151  | 5   | - | MeJA responsiveness            |
| Gbar_D02G023090.1 | 1668 | 7   | + | light responsiveness           |
| Gbar_D02G023090.1 | 1600 | 7   | + | abscisic acid responsiveness   |
| Gbar_D02G023090.1 | 1536 | 6   | - | anaerobic induction            |
| Gbar_D02G023090.1 | 1711 | 6   | - | anaerobic induction            |
| Gbar_D02G023090.1 | 1854 | 6   | - | anaerobic induction            |
| Gbar_D02G023090.1 | 1124 | 6   | + | low-temperature responsiveness |
| Gbar_D02G023090.1 | 845  | 6   | + | light responsiveness           |
| Gbar_D02G023830.1 | 716  | 13  | + | light responsiveness           |
| Gbar_D02G023830.1 | 225  | 5   | + | MeJA responsiveness            |
| Gbar_D02G023830.1 | 968  | 5   | - | MeJA responsiveness            |
| Gbar_D02G023830.1 | 986  | 5   | + | MeJA responsiveness            |
| Gbar_D02G023830.1 | 1721 | 8   | - | light responsiveness           |
| Gbar_D02G023830.1 | 1898 | 8   | - | light responsiveness           |
| Gbar_D02G023830.1 | 1262 | 6   | - | light responsiveness           |
| Gbar_D02G023830.1 | 1290 | 10  | + | light responsiveness           |
| Gbar_D02G023830.1 | 336  | 7   | + | light responsiveness           |
| Gbar_D02G023830.1 | 1960 | 6   | + | light responsiveness           |
| Gbar_D02G023830.1 | 225  | 5   | - | MeJA responsiveness            |
| Gbar_D02G023830.1 | 968  | 5   | + | MeJA responsiveness            |
| Gbar_D02G023830.1 | 986  | 5   | - | MeJA responsiveness            |
| Gbar_D02G023830.1 | 707  | 6   | + | light responsiveness           |
| Gbar_D02G023830.1 | 717  | 6   | + | light responsiveness           |

|                   |      |     |   |                                   |
|-------------------|------|-----|---|-----------------------------------|
| Gbar_D02G023830.1 | 1227 | 6   | - | light responsiveness              |
| Gbar_D02G023830.1 | 914  | 8   | - | light responsiveness              |
| Gbar_D02G023830.1 | 1064 | 9   | + | light responsiveness              |
| Gbar_D02G023830.1 | 970  | 5   | + | abscisic acid responsiveness      |
| Gbar_D02G023830.1 | 1263 | 5   | + | abscisic acid responsiveness      |
| Gbar_D02G023830.1 | 1586 | 5   | + | abscisic acid responsiveness      |
| Gbar_D02G023830.1 | 969  | 6   | - | light responsiveness              |
| Gbar_D02G023830.1 | 1585 | 6   | + | light responsiveness              |
| Gbar_D02G023830.1 | 177  | 7   | - | gibberellin responsiveness        |
| Gbar_D02G023830.1 | 279  | 6   | - | anaerobic induction               |
| Gbar_D02G023830.1 | 676  | 6   | + | anaerobic induction               |
| Gbar_D02G023830.1 | 1039 | 6   | + | anaerobic induction               |
| Gbar_D02G023830.1 | 233  | 7   | - | gibberellin responsiveness        |
| Gbar_D04G001290.1 | 1886 | 6   | - | auxin responsiveness              |
| Gbar_D04G001290.1 | 1126 | 6   | - | light responsiveness              |
| Gbar_D04G001290.1 | 330  | 8.5 | + | cell cycle regulation             |
| Gbar_D04G001290.1 | 203  | 8   | + | light responsiveness              |
| Gbar_D04G001290.1 | 606  | 6   | + | light responsiveness              |
| Gbar_D04G001290.1 | 1617 | 6   | - | light responsiveness              |
| Gbar_D04G001290.1 | 997  | 5   | - | MeJA responsiveness               |
| Gbar_D04G001290.1 | 1306 | 9   | + | defense and stress responsiveness |
| Gbar_D04G001290.1 | 1702 | 8   | + | light responsiveness              |
| Gbar_D04G001290.1 | 997  | 5   | + | MeJA responsiveness               |
| Gbar_D04G001290.1 | 1449 | 6   | + | light responsiveness              |
| Gbar_D04G001290.1 | 1310 | 6   | + | light responsiveness              |
| Gbar_D04G001290.1 | 69   | 9   | + | light responsiveness              |
| Gbar_D04G001290.1 | 929  | 6   | - | drought inducibility              |
| Gbar_D04G001290.1 | 1450 | 5   | + | abscisic acid responsiveness      |
| Gbar_D04G017730.1 | 305  | 8   | - | light responsiveness              |
| Gbar_D04G017730.1 | 1523 | 8   | - | light responsiveness              |
| Gbar_D04G017730.1 | 951  | 5   | + | MeJA responsiveness               |
| Gbar_D04G017730.1 | 951  | 5   | - | MeJA responsiveness               |
| Gbar_D04G017730.1 | 1383 | 9   | + | light responsiveness              |
| Gbar_D04G017730.1 | 419  | 6   | + | light responsiveness              |
| Gbar_D04G017730.1 | 529  | 6   | + | light responsiveness              |
| Gbar_D04G017730.1 | 523  | 9   | + | cell cycle regulation             |
| Gbar_D04G017730.1 | 1542 | 8   | - | light responsiveness              |
| Gbar_D04G017730.1 | 1644 | 10  | - | light responsiveness              |
| Gbar_D04G017730.1 | 1215 | 7   | - | gibberellin responsiveness        |
| Gbar_D04G017730.1 | 123  | 6   | - | light responsiveness              |

|                   |      |    |   |                                   |
|-------------------|------|----|---|-----------------------------------|
| Gbar_D04G017730.1 | 480  | 6  | + | low-temperature responsiveness    |
| Gbar_D04G017730.1 | 1264 | 7  | - | gibberellin responsiveness        |
| Gbar_D04G017740.1 | 295  | 6  | - | light responsiveness              |
| Gbar_D04G017740.1 | 1425 | 6  | - | light responsiveness              |
| Gbar_D04G017740.1 | 877  | 6  | - | light responsiveness              |
| Gbar_D04G017740.1 | 1883 | 6  | - | anaerobic induction               |
| Gbar_D04G017740.1 | 607  | 9  | - | circadian control                 |
| Gbar_D04G017740.1 | 449  | 7  | + | abscisic acid responsiveness      |
| Gbar_D04G017740.1 | 878  | 5  | + | abscisic acid responsiveness      |
| Gbar_D04G017740.1 | 860  | 8  | - | light responsiveness              |
| Gbar_D04G017740.1 | 876  | 5  | + | MeJA responsiveness               |
| Gbar_D04G017740.1 | 398  | 6  | + | light responsiveness              |
| Gbar_D04G017740.1 | 628  | 6  | + | light responsiveness              |
| Gbar_D04G017740.1 | 1002 | 6  | - | light responsiveness              |
| Gbar_D04G017740.1 | 1661 | 8  | - | light responsiveness              |
| Gbar_D04G017740.1 | 232  | 7  | - | light responsiveness              |
| Gbar_D04G017740.1 | 233  | 6  | - | light responsiveness              |
| Gbar_D04G017740.1 | 382  | 7  | - | light responsiveness              |
| Gbar_D04G017740.1 | 383  | 6  | - | light responsiveness              |
| Gbar_D04G017740.1 | 892  | 6  | + | light responsiveness              |
| Gbar_D04G017740.1 | 1080 | 6  | + | light responsiveness              |
| Gbar_D04G017740.1 | 761  | 8  | + | light responsiveness              |
| Gbar_D04G017740.1 | 876  | 5  | - | MeJA responsiveness               |
| Gbar_D04G017740.1 | 1664 | 8  | + | light responsiveness              |
| Gbar_D04G017740.1 | 1425 | 9  | - | defense and stress responsiveness |
| Gbar_D05G027400.1 | 1969 | 6  | + | low-temperature responsiveness    |
| Gbar_D05G027400.1 | 528  | 6  | + | light responsiveness              |
| Gbar_D05G027400.1 | 1911 | 6  | + | light responsiveness              |
| Gbar_D05G027400.1 | 700  | 6  | + | anaerobic induction               |
| Gbar_D05G027400.1 | 34   | 7  | + | light responsiveness              |
| Gbar_D05G027400.1 | 618  | 6  | + | light responsiveness              |
| Gbar_D05G027400.1 | 1847 | 6  | + | light responsiveness              |
| Gbar_D05G027400.1 | 1848 | 5  | + | abscisic acid responsiveness      |
| Gbar_D05G027400.1 | 1266 | 9  | - | light responsiveness              |
| Gbar_D05G027400.1 | 1538 | 10 | + | light responsiveness              |
| Gbar_D05G027400.1 | 792  | 10 | - | light responsiveness              |
| Gbar_D05G027400.1 | 797  | 10 | - | light responsiveness              |
| Gbar_D05G027400.1 | 1201 | 6  | + | drought inducibility              |
| Gbar_D05G027400.1 | 431  | 6  | + | light responsiveness              |
| Gbar_D05G027400.1 | 1092 | 6  | - | light responsiveness              |

|                   |      |     |   |                                |
|-------------------|------|-----|---|--------------------------------|
| Gbar_D05G027400.1 | 1117 | 6   | - | light responsiveness           |
| Gbar_D05G027400.1 | 455  | 5   | - | MeJA responsiveness            |
| Gbar_D05G027400.1 | 1780 | 5   | - | MeJA responsiveness            |
| Gbar_D05G027400.1 | 1957 | 5   | - | MeJA responsiveness            |
| Gbar_D05G027400.1 | 261  | 9   | - | salicylic acid responsiveness  |
| Gbar_D05G027400.1 | 79   | 6   | + | light responsiveness           |
| Gbar_D05G027400.1 | 1777 | 8   | - | auxin responsiveness           |
| Gbar_D05G027400.1 | 1650 | 8   | + | light responsiveness           |
| Gbar_D05G027400.1 | 1555 | 6   | + | auxin responsiveness           |
| Gbar_D05G027400.1 | 473  | 9   | - | light responsiveness           |
| Gbar_D05G027400.1 | 455  | 5   | + | MeJA responsiveness            |
| Gbar_D05G027400.1 | 1780 | 5   | + | MeJA responsiveness            |
| Gbar_D05G027400.1 | 1957 | 5   | + | MeJA responsiveness            |
| Gbar_D05G027400.1 | 1764 | 13  | - | light responsiveness           |
| Gbar_D05G028280.1 | 1914 | 6   | + | low-temperature responsiveness |
| Gbar_D05G028280.1 | 46   | 6   | - | anaerobic induction            |
| Gbar_D05G028280.1 | 545  | 6   | - | anaerobic induction            |
| Gbar_D05G028280.1 | 1531 | 6   | + | anaerobic induction            |
| Gbar_D05G028280.1 | 1544 | 6   | + | anaerobic induction            |
| Gbar_D05G028280.1 | 1583 | 6   | - | anaerobic induction            |
| Gbar_D05G028280.1 | 1780 | 6   | + | anaerobic induction            |
| Gbar_D05G028280.1 | 761  | 8   | + | light responsiveness           |
| Gbar_D05G028280.1 | 208  | 6   | + | light responsiveness           |
| Gbar_D05G028280.1 | 732  | 6   | + | light responsiveness           |
| Gbar_D05G028280.1 | 775  | 6   | + | light responsiveness           |
| Gbar_D05G028280.1 | 1021 | 6   | - | light responsiveness           |
| Gbar_D05G028280.1 | 1404 | 6   | - | light responsiveness           |
| Gbar_D05G028280.1 | 84   | 5   | + | MeJA responsiveness            |
| Gbar_D05G028280.1 | 1869 | 9   | + | salicylic acid responsiveness  |
| Gbar_D05G028280.1 | 1747 | 8   | + | light responsiveness           |
| Gbar_D05G028280.1 | 739  | 9   | - | light responsiveness           |
| Gbar_D05G028280.1 | 1273 | 9.5 | - | light responsiveness           |
| Gbar_D05G028280.1 | 84   | 5   | - | MeJA responsiveness            |
| Gbar_D06G020250.1 | 1985 | 7   | - | gibberellin responsiveness     |
| Gbar_D06G020250.1 | 346  | 6   | + | light responsiveness           |
| Gbar_D06G020250.1 | 1083 | 6   | + | light responsiveness           |
| Gbar_D06G020250.1 | 1098 | 6   | - | low-temperature responsiveness |
| Gbar_D06G020250.1 | 1345 | 6   | - | anaerobic induction            |
| Gbar_D06G020250.1 | 1676 | 6   | - | anaerobic induction            |
| Gbar_D06G020250.1 | 239  | 9   | + | light responsiveness           |

|                   |      |    |   |                                |
|-------------------|------|----|---|--------------------------------|
| Gbar_D06G020250.1 | 971  | 10 | - | light responsiveness           |
| Gbar_D06G020250.1 | 604  | 6  | + | light responsiveness           |
| Gbar_D06G020250.1 | 649  | 6  | + | light responsiveness           |
| Gbar_D06G020250.1 | 672  | 6  | + | light responsiveness           |
| Gbar_D06G020250.1 | 676  | 6  | + | light responsiveness           |
| Gbar_D06G020250.1 | 984  | 6  | + | light responsiveness           |
| Gbar_D06G020250.1 | 1275 | 6  | - | light responsiveness           |
| Gbar_D06G020250.1 | 1606 | 6  | - | light responsiveness           |
| Gbar_D06G020250.1 | 1449 | 6  | + | auxin responsiveness           |
| Gbar_D06G020250.1 | 909  | 6  | - | light responsiveness           |
| Gbar_D06G020250.1 | 1778 | 13 | - | light responsiveness           |
| Gbar_D09G021980.1 | 844  | 6  | - | low-temperature responsiveness |
| Gbar_D09G021980.1 | 1969 | 6  | - | low-temperature responsiveness |
| Gbar_D09G021980.1 | 11   | 8  | + | light responsiveness           |
| Gbar_D09G021980.1 | 166  | 6  | + | light responsiveness           |
| Gbar_D09G021980.1 | 880  | 6  | + | light responsiveness           |
| Gbar_D09G021980.1 | 1907 | 6  | - | anaerobic induction            |
| Gbar_D09G021980.1 | 14   | 5  | + | abscisic acid responsiveness   |
| Gbar_D09G021980.1 | 166  | 6  | + | abscisic acid responsiveness   |
| Gbar_D09G021980.1 | 167  | 5  | + | abscisic acid responsiveness   |
| Gbar_D09G021980.1 | 878  | 9  | - | abscisic acid responsiveness   |
| Gbar_D09G021980.1 | 880  | 6  | + | abscisic acid responsiveness   |
| Gbar_D09G021980.1 | 881  | 5  | + | abscisic acid responsiveness   |
| Gbar_D09G021980.1 | 1347 | 5  | - | abscisic acid responsiveness   |
| Gbar_D09G021980.1 | 434  | 6  | + | drought inducibility           |
| Gbar_D09G021980.1 | 742  | 6  | + | drought inducibility           |
| Gbar_D09G021980.1 | 1450 | 6  | + | drought inducibility           |
| Gbar_D09G021980.1 | 1581 | 7  | + | light responsiveness           |
| Gbar_D09G021980.1 | 1180 | 6  | - | light responsiveness           |
| Gbar_D09G021980.1 | 1291 | 6  | + | auxin responsiveness           |
| Gbar_D09G021980.1 | 577  | 9  | + | light responsiveness           |
| Gbar_D09G021980.1 | 1773 | 9  | + | salicylic acid responsiveness  |
| Gbar_D09G021980.1 | 1157 | 13 | - | light responsiveness           |
| Gbar_D09G021980.1 | 13   | 6  | - | light responsiveness           |
| Gbar_D09G021980.1 | 166  | 6  | + | light responsiveness           |
| Gbar_D09G021980.1 | 880  | 6  | + | light responsiveness           |
| Gbar_D09G021980.1 | 1347 | 6  | + | light responsiveness           |
| Gbar_D09G021980.1 | 524  | 6  | + | anoxic specific inducibility   |
| Gbar_D10G013120.1 | 1484 | 6  | + | low-temperature responsiveness |
| Gbar_D10G013120.1 | 73   | 6  | + | anaerobic induction            |



|                   |      |   |   |                               |
|-------------------|------|---|---|-------------------------------|
| Gbar_D10G013120.1 | 353  | 6 | + | anaerobic induction           |
| Gbar_D10G013120.1 | 651  | 6 | + | anaerobic induction           |
| Gbar_D10G013120.1 | 970  | 6 | + | anaerobic induction           |
| Gbar_D10G013120.1 | 1542 | 9 | - | wound responsiveness          |
| Gbar_D10G013120.1 | 1522 | 6 | + | drought inducibility          |
| Gbar_D10G013120.1 | 290  | 5 | + | MeJA responsiveness           |
| Gbar_D10G013120.1 | 462  | 6 | + | light responsiveness          |
| Gbar_D10G013120.1 | 1010 | 6 | - | light responsiveness          |
| Gbar_D10G013120.1 | 785  | 6 | - | auxin responsiveness          |
| Gbar_D10G013120.1 | 1289 | 9 | + | light responsiveness          |
| Gbar_D10G013120.1 | 776  | 7 | - | light responsiveness          |
| Gbar_D10G013120.1 | 777  | 6 | - | light responsiveness          |
| Gbar_D10G013120.1 | 1662 | 9 | - | salicylic acid responsiveness |
| Gbar_D10G013120.1 | 290  | 5 | - | MeJA responsiveness           |
| Gbar_D10G019420.1 | 264  | 6 | + | anaerobic induction           |
| Gbar_D10G019420.1 | 1757 | 6 | - | light responsiveness          |
| Gbar_D10G019420.1 | 1755 | 8 | - | abscisic acid responsiveness  |
| Gbar_D10G019420.1 | 1757 | 5 | - | abscisic acid responsiveness  |
| Gbar_D10G019420.1 | 311  | 6 | + | drought inducibility          |
| Gbar_D10G019420.1 | 1755 | 9 | + | light responsiveness          |
| Gbar_D10G019420.1 | 1739 | 8 | + | light responsiveness          |
| Gbar_D10G019420.1 | 678  | 6 | + | light responsiveness          |
| Gbar_D10G019420.1 | 780  | 6 | + | light responsiveness          |
| Gbar_D10G019420.1 | 990  | 6 | + | light responsiveness          |
| Gbar_D10G019420.1 | 1084 | 6 | - | light responsiveness          |
| Gbar_D10G019420.1 | 1317 | 6 | - | light responsiveness          |
| Gbar_D10G019420.1 | 1597 | 6 | - | light responsiveness          |
| Gbar_D10G019420.1 | 1699 | 6 | - | light responsiveness          |
| Gbar_D10G019420.1 | 443  | 7 | - | light responsiveness          |
| Gbar_D10G019420.1 | 1855 | 6 | - | auxin responsiveness          |
| Gbar_D10G019420.1 | 567  | 6 | + | light responsiveness          |
| Gbar_D10G019420.1 | 654  | 7 | + | light responsiveness          |
| Gbar_D10G019420.1 | 1229 | 6 | + | light responsiveness          |
| Gbar_D10G019420.1 | 1432 | 6 | - | light responsiveness          |
| Gbar_D10G019420.1 | 729  | 9 | - | salicylic acid responsiveness |
| Gbar_D10G019420.1 | 549  | 8 | + | light responsiveness          |
| Gbar_D10G019420.1 | 1842 | 8 | + | light responsiveness          |
| Gbar_D11G031450.1 | 1045 | 5 | + | abscisic acid responsiveness  |
| Gbar_D11G031450.1 | 1228 | 5 | + | abscisic acid responsiveness  |
| Gbar_D11G031450.1 | 181  | 6 | + | drought inducibility          |

|                   |      |    |   |                                |
|-------------------|------|----|---|--------------------------------|
| Gbar_D11G031450.1 | 1465 | 7  | + | light responsiveness           |
| Gbar_D11G031450.1 | 1724 | 7  | + | light responsiveness           |
| Gbar_D11G031450.1 | 132  | 6  | + | low-temperature responsiveness |
| Gbar_D11G031450.1 | 195  | 6  | + | low-temperature responsiveness |
| Gbar_D11G031450.1 | 170  | 7  | - | gibberellin responsiveness     |
| Gbar_D11G031450.1 | 940  | 6  | - | anaerobic induction            |
| Gbar_D11G031450.1 | 1044 | 6  | + | light responsiveness           |
| Gbar_D11G031450.1 | 1227 | 6  | - | light responsiveness           |
| Gbar_D11G031450.1 | 1511 | 8  | - | light responsiveness           |
| Gbar_D11G031450.1 | 222  | 13 | - | light responsiveness           |
| Gbar_D11G031450.1 | 126  | 5  | + | MeJA responsiveness            |
| Gbar_D11G031450.1 | 978  | 5  | - | MeJA responsiveness            |
| Gbar_D11G031450.1 | 1152 | 5  | - | MeJA responsiveness            |
| Gbar_D11G031450.1 | 1226 | 5  | - | MeJA responsiveness            |
| Gbar_D11G031450.1 | 1359 | 5  | - | MeJA responsiveness            |
| Gbar_D11G031450.1 | 335  | 6  | + | light responsiveness           |
| Gbar_D11G031450.1 | 529  | 6  | + | light responsiveness           |
| Gbar_D11G031450.1 | 661  | 6  | + | light responsiveness           |
| Gbar_D11G031450.1 | 668  | 6  | + | light responsiveness           |
| Gbar_D11G031450.1 | 725  | 6  | + | light responsiveness           |
| Gbar_D11G031450.1 | 1764 | 6  | - | light responsiveness           |
| Gbar_D11G031450.1 | 1768 | 6  | - | light responsiveness           |
| Gbar_D11G031450.1 | 126  | 5  | - | MeJA responsiveness            |
| Gbar_D11G031450.1 | 978  | 5  | + | MeJA responsiveness            |
| Gbar_D11G031450.1 | 1152 | 5  | + | MeJA responsiveness            |
| Gbar_D11G031450.1 | 1226 | 5  | + | MeJA responsiveness            |
| Gbar_D11G031450.1 | 1359 | 5  | + | MeJA responsiveness            |
| Gbar_D11G031450.1 | 140  | 9  | - | light responsiveness           |
| Gbar_D11G031450.1 | 1960 | 7  | - | light responsiveness           |
| Gbar_D11G031450.1 | 1961 | 6  | - | light responsiveness           |
| Gbar_D12G002730.1 | 918  | 7  | - | light responsiveness           |
| Gbar_D12G002730.1 | 1165 | 8  | + | light responsiveness           |
| Gbar_D12G002730.1 | 1303 | 6  | - | anaerobic induction            |
| Gbar_D12G002730.1 | 1873 | 6  | - | anaerobic induction            |
| Gbar_D12G002730.1 | 491  | 6  | - | light responsiveness           |
| Gbar_D12G002730.1 | 581  | 6  | + | light responsiveness           |
| Gbar_D12G002730.1 | 1602 | 6  | - | light responsiveness           |
| Gbar_D12G002730.1 | 7    | 6  | - | low-temperature responsiveness |
| Gbar_D12G002730.1 | 553  | 6  | + | low-temperature responsiveness |
| Gbar_D12G002730.1 | 142  | 9  | - | light responsiveness           |

|                   |      |   |   |                                   |
|-------------------|------|---|---|-----------------------------------|
| Gbar_D12G002730.1 | 1357 | 6 | + | drought inducibility              |
| Gbar_D12G002730.1 | 735  | 5 | - | abscisic acid responsiveness      |
| Gbar_D12G002730.1 | 1168 | 5 | + | abscisic acid responsiveness      |
| Gbar_D12G002730.1 | 1590 | 6 | - | light responsiveness              |
| Gbar_D12G002730.1 | 1724 | 9 | + | salicylic acid responsiveness     |
| Gbar_D12G002730.1 | 1211 | 9 | - | light responsiveness              |
| Gbar_D12G002730.1 | 44   | 6 | + | light responsiveness              |
| Gbar_D12G002730.1 | 136  | 6 | + | light responsiveness              |
| Gbar_D12G002730.1 | 168  | 6 | + | light responsiveness              |
| Gbar_D12G002730.1 | 350  | 6 | + | light responsiveness              |
| Gbar_D12G002730.1 | 735  | 6 | + | light responsiveness              |
| Gbar_D12G002730.1 | 1167 | 6 | - | light responsiveness              |
| Gbar_D12G023100.1 | 1779 | 7 | - | light responsiveness              |
| Gbar_D12G023100.1 | 1107 | 7 | - | gibberellin responsiveness        |
| Gbar_D12G023100.1 | 503  | 6 | - | anaerobic induction               |
| Gbar_D12G023100.1 | 1068 | 6 | + | anaerobic induction               |
| Gbar_D12G023100.1 | 1708 | 6 | - | anaerobic induction               |
| Gbar_D12G023100.1 | 175  | 6 | - | low-temperature responsiveness    |
| Gbar_D12G023100.1 | 1990 | 7 | + | light responsiveness              |
| Gbar_D12G023100.1 | 910  | 9 | - | abscisic acid responsiveness      |
| Gbar_D12G023100.1 | 290  | 6 | - | auxin responsiveness              |
| Gbar_D12G023100.1 | 1600 | 6 | - | auxin responsiveness              |
| Gbar_D12G023100.1 | 1561 | 9 | + | salicylic acid responsiveness     |
| Gbar_D12G023100.1 | 430  | 6 | - | light responsiveness              |
| Gbar_D12G023100.1 | 654  | 6 | - | light responsiveness              |
| Gbar_D12G023100.1 | 55   | 5 | + | MeJA responsiveness               |
| Gbar_D12G023100.1 | 1966 | 5 | - | MeJA responsiveness               |
| Gbar_D12G023100.1 | 221  | 6 | + | light responsiveness              |
| Gbar_D12G023100.1 | 307  | 6 | + | light responsiveness              |
| Gbar_D12G023100.1 | 55   | 5 | - | MeJA responsiveness               |
| Gbar_D12G023100.1 | 1966 | 5 | + | MeJA responsiveness               |
| Gbar_D13G003400.1 | 127  | 9 | + | defense and stress responsiveness |
| Gbar_D13G003400.1 | 1354 | 9 | + | defense and stress responsiveness |
| Gbar_D13G003400.1 | 989  | 6 | + | light responsiveness              |
| Gbar_D13G003400.1 | 1201 | 6 | - | auxin responsiveness              |
| Gbar_D13G003400.1 | 1152 | 9 | - | light responsiveness              |
| Gbar_D13G003400.1 | 781  | 9 | + | salicylic acid responsiveness     |
| Gbar_D13G003400.1 | 1576 | 6 | - | light responsiveness              |
| Gbar_D13G003400.1 | 110  | 8 | + | abscisic acid responsiveness      |
| Gbar_D13G003400.1 | 111  | 5 | + | abscisic acid responsiveness      |

|                   |      |    |   |                                |
|-------------------|------|----|---|--------------------------------|
| Gbar_D13G003400.1 | 1700 | 10 | - | light responsiveness           |
| Gbar_D13G003400.1 | 108  | 9  | - | light responsiveness           |
| Gbar_D13G003400.1 | 53   | 10 | - | light responsiveness           |
| Gbar_D13G003400.1 | 895  | 7  | + | gibberellin responsiveness     |
| Gbar_D13G003400.1 | 519  | 6  | + | low-temperature responsiveness |
| Gbar_D13G003400.1 | 131  | 6  | + | light responsiveness           |
| Gbar_D13G003400.1 | 490  | 10 | + | light responsiveness           |
| Gbar_D13G003400.1 | 937  | 6  | - | anaerobic induction            |
| Gbar_D13G003400.1 | 1314 | 6  | - | anaerobic induction            |
| Gbar_D13G003400.1 | 1522 | 6  | + | anaerobic induction            |
| Gbar_D13G003400.1 | 1572 | 6  | - | anaerobic induction            |
| Gbar_D13G003400.1 | 1867 | 6  | - | anaerobic induction            |
| Gbar_D13G003400.1 | 110  | 6  | + | light responsiveness           |
| Gbar_D13G003400.1 | 1727 | 9  | - | light responsiveness           |
| Gbar_D13G009810.1 | 1018 | 8  | + | light responsiveness           |
| Gbar_D13G009810.1 | 1472 | 8  | + | light responsiveness           |
| Gbar_D13G009810.1 | 1808 | 8  | - | light responsiveness           |
| Gbar_D13G009810.1 | 939  | 6  | + | light responsiveness           |
| Gbar_D13G009810.1 | 1210 | 6  | - | light responsiveness           |
| Gbar_D13G009810.1 | 210  | 6  | + | light responsiveness           |
| Gbar_D13G009810.1 | 439  | 6  | + | light responsiveness           |
| Gbar_D13G009810.1 | 1919 | 6  | + | light responsiveness           |
| Gbar_D13G009810.1 | 1946 | 9  | + | salicylic acid responsiveness  |
| Gbar_D13G009810.1 | 1383 | 5  | + | abscisic acid responsiveness   |
| Gbar_D13G009810.1 | 964  | 9  | + | light responsiveness           |
| Gbar_D13G009810.1 | 1979 | 6  | - | light responsiveness           |
| Gbar_D13G009810.1 | 831  | 6  | - | anaerobic induction            |
| Gbar_D13G009810.1 | 1382 | 6  | + | light responsiveness           |
| Gbar_D13G016200.1 | 106  | 5  | - | MeJA responsiveness            |
| Gbar_D13G016200.1 | 1931 | 5  | - | MeJA responsiveness            |
| Gbar_D13G016200.1 | 1115 | 8  | + | light responsiveness           |
| Gbar_D13G016200.1 | 397  | 8  | + | light responsiveness           |
| Gbar_D13G016200.1 | 1458 | 6  | - | light responsiveness           |
| Gbar_D13G016200.1 | 1320 | 6  | + | light responsiveness           |
| Gbar_D13G016200.1 | 106  | 5  | + | MeJA responsiveness            |
| Gbar_D13G016200.1 | 1931 | 5  | + | MeJA responsiveness            |
| Gbar_D13G016200.1 | 785  | 6  | + | light responsiveness           |
| Gbar_D13G016200.1 | 865  | 6  | + | light responsiveness           |
| Gbar_D13G016200.1 | 1689 | 6  | - | light responsiveness           |
| Gbar_D13G016200.1 | 1715 | 9  | + | light responsiveness           |

|                   |      |   |   |                              |
|-------------------|------|---|---|------------------------------|
| Gbar_D13G016200.1 | 1458 | 6 | - | abscisic acid responsiveness |
| Gbar_D13G016200.1 | 1459 | 5 | + | abscisic acid responsiveness |
| Gbar_D13G016200.1 | 1458 | 6 | - | light responsiveness         |
| Gbar_D13G016200.1 | 1910 | 7 | - | light responsiveness         |
| Gbar_D13G016200.1 | 1917 | 6 | - | anaerobic induction          |
| Gbar_D13G016200.1 | 1400 | 6 | - | light responsiveness         |

**Table S4c. cis elements in Gh RF2 genes**

|                   |      |    |   |                                |
|-------------------|------|----|---|--------------------------------|
| Ghir_A01G022860.1 | 1006 | 7  | + | light responsiveness           |
| Ghir_A01G022860.1 | 329  | 6  | + | anaerobic induction            |
| Ghir_A01G022860.1 | 1038 | 6  | - | anaerobic induction            |
| Ghir_A01G022860.1 | 1604 | 6  | - | light responsiveness           |
| Ghir_A01G022860.1 | 1868 | 6  | - | light responsiveness           |
| Ghir_A01G022860.1 | 67   | 6  | + | light responsiveness           |
| Ghir_A01G022860.1 | 314  | 6  | + | light responsiveness           |
| Ghir_A01G022860.1 | 516  | 6  | + | light responsiveness           |
| Ghir_A01G022860.1 | 586  | 6  | + | light responsiveness           |
| Ghir_A01G022860.1 | 607  | 6  | + | light responsiveness           |
| Ghir_A01G022860.1 | 627  | 6  | + | light responsiveness           |
| Ghir_A01G022860.1 | 769  | 6  | + | light responsiveness           |
| Ghir_A01G022860.1 | 803  | 6  | + | light responsiveness           |
| Ghir_A01G022860.1 | 1779 | 6  | - | light responsiveness           |
| Ghir_A01G022860.1 | 1604 | 6  | - | abscisic acid responsiveness   |
| Ghir_A01G022860.1 | 1605 | 5  | + | abscisic acid responsiveness   |
| Ghir_A01G022860.1 | 1604 | 6  | - | light responsiveness           |
| Ghir_A01G022860.1 | 1122 | 7  | - | auxin responsiveness           |
| Ghir_A01G022860.1 | 118  | 9  | + | salicylic acid responsiveness  |
| Ghir_A02G001350.1 | 255  | 5  | - | abscisic acid responsiveness   |
| Ghir_A02G001350.1 | 1006 | 5  | - | MeJA responsiveness            |
| Ghir_A02G001350.1 | 348  | 6  | - | light responsiveness           |
| Ghir_A02G001350.1 | 796  | 6  | + | light responsiveness           |
| Ghir_A02G001350.1 | 1725 | 9  | + | salicylic acid responsiveness  |
| Ghir_A02G001350.1 | 255  | 6  | + | light responsiveness           |
| Ghir_A02G001350.1 | 1006 | 5  | + | MeJA responsiveness            |
| Ghir_A02G001350.1 | 884  | 6  | - | auxin responsiveness           |
| Ghir_A02G001350.1 | 335  | 6  | + | light responsiveness           |
| Ghir_A02G001350.1 | 933  | 6  | + | light responsiveness           |
| Ghir_A02G001350.1 | 953  | 6  | + | light responsiveness           |
| Ghir_A02G001350.1 | 1254 | 6  | - | light responsiveness           |
| Ghir_A02G001350.1 | 1343 | 6  | - | light responsiveness           |
| Ghir_A02G001350.1 | 1498 | 6  | - | light responsiveness           |
| Ghir_A02G001350.1 | 1605 | 6  | - | light responsiveness           |
| Ghir_A02G001350.1 | 836  | 6  | + | low-temperature responsiveness |
| Ghir_A02G001350.1 | 255  | 8  | - | light responsiveness           |
| Ghir_A02G006740.1 | 1959 | 10 | + | light responsiveness           |
| Ghir_A02G006740.1 | 148  | 10 | + | light responsiveness           |

|                   |      |    |   |                                   |
|-------------------|------|----|---|-----------------------------------|
| Ghir_A02G006740.1 | 287  | 10 | - | light responsiveness              |
| Ghir_A02G006740.1 | 358  | 6  | - | light responsiveness              |
| Ghir_A02G006740.1 | 1466 | 6  | - | light responsiveness              |
| Ghir_A02G006740.1 | 1483 | 6  | + | light responsiveness              |
| Ghir_A02G006740.1 | 195  | 5  | + | abscisic acid responsiveness      |
| Ghir_A02G006740.1 | 359  | 5  | + | abscisic acid responsiveness      |
| Ghir_A02G006740.1 | 870  | 5  | + | abscisic acid responsiveness      |
| Ghir_A02G006740.1 | 1467 | 5  | + | abscisic acid responsiveness      |
| Ghir_A02G006740.1 | 1483 | 5  | - | abscisic acid responsiveness      |
| Ghir_A02G006740.1 | 868  | 5  | - | MeJA responsiveness               |
| Ghir_A02G006740.1 | 1706 | 6  | - | light responsiveness              |
| Ghir_A02G006740.1 | 1449 | 6  | + | light responsiveness              |
| Ghir_A02G006740.1 | 1549 | 6  | - | light responsiveness              |
| Ghir_A02G006740.1 | 1917 | 6  | + | light responsiveness              |
| Ghir_A02G006740.1 | 1937 | 9  | + | defense and stress responsiveness |
| Ghir_A02G006740.1 | 307  | 7  | - | light responsiveness              |
| Ghir_A02G006740.1 | 792  | 6  | - | drought inducibility              |
| Ghir_A02G006740.1 | 301  | 6  | - | auxin responsiveness              |
| Ghir_A02G006740.1 | 77   | 8  | + | light responsiveness              |
| Ghir_A02G006740.1 | 193  | 9  | - | light responsiveness              |
| Ghir_A02G006740.1 | 194  | 6  | + | light responsiveness              |
| Ghir_A02G006740.1 | 869  | 6  | - | light responsiveness              |
| Ghir_A02G006740.1 | 1464 | 8  | + | light responsiveness              |
| Ghir_A02G006740.1 | 868  | 5  | + | MeJA responsiveness               |
| Ghir_A03G009200.1 | 849  | 6  | + | light responsiveness              |
| Ghir_A03G009200.1 | 1697 | 6  | - | light responsiveness              |
| Ghir_A03G009200.1 | 169  | 6  | + | light responsiveness              |
| Ghir_A03G009200.1 | 661  | 6  | + | light responsiveness              |
| Ghir_A03G009200.1 | 772  | 6  | - | light responsiveness              |
| Ghir_A03G009200.1 | 1226 | 6  | + | light responsiveness              |
| Ghir_A03G009200.1 | 1896 | 6  | - | light responsiveness              |
| Ghir_A03G009200.1 | 247  | 5  | - | abscisic acid responsiveness      |
| Ghir_A03G009200.1 | 1312 | 5  | - | abscisic acid responsiveness      |
| Ghir_A03G009200.1 | 271  | 6  | - | light responsiveness              |
| Ghir_A03G009200.1 | 58   | 13 | + | light responsiveness              |
| Ghir_A03G009200.1 | 1242 | 7  | + | gibberellin responsiveness        |
| Ghir_A03G009200.1 | 232  | 7  | - | light responsiveness              |
| Ghir_A03G009200.1 | 518  | 7  | + | light responsiveness              |
| Ghir_A03G009200.1 | 1003 | 6  | - | anaerobic induction               |
| Ghir_A03G009200.1 | 1243 | 10 | + | light responsiveness              |

|                   |      |     |   |                                |
|-------------------|------|-----|---|--------------------------------|
| Ghir_A03G009200.1 | 356  | 6   | + | light responsiveness           |
| Ghir_A03G009200.1 | 668  | 6   | + | light responsiveness           |
| Ghir_A03G009200.1 | 813  | 6   | + | light responsiveness           |
| Ghir_A03G009200.1 | 647  | 8   | - | light responsiveness           |
| Ghir_A03G009200.1 | 1311 | 9   | + | light responsiveness           |
| Ghir_A03G009200.1 | 1953 | 9.5 | - | light responsiveness           |
| Ghir_A03G009200.1 | 247  | 6   | - | light responsiveness           |
| Ghir_A03G009200.1 | 1309 | 9   | + | light responsiveness           |
| Ghir_A03G009200.1 | 1312 | 6   | - | light responsiveness           |
| Ghir_A03G009200.1 | 346  | 6   | + | drought inducibility           |
| Ghir_A03G009200.1 | 1982 | 6   | - | drought inducibility           |
| Ghir_A03G009200.1 | 1055 | 6   | - | auxin responsiveness           |
| Ghir_A03G021100.1 | 1668 | 7   | + | light responsiveness           |
| Ghir_A03G021100.1 | 1892 | 9   | - | light responsiveness           |
| Ghir_A03G021100.1 | 558  | 7   | - | light responsiveness           |
| Ghir_A03G021100.1 | 1671 | 7   | - | light responsiveness           |
| Ghir_A03G021100.1 | 34   | 6   | - | light responsiveness           |
| Ghir_A03G021100.1 | 425  | 6   | + | light responsiveness           |
| Ghir_A03G021100.1 | 856  | 6   | + | light responsiveness           |
| Ghir_A03G021100.1 | 595  | 9   | - | salicylic acid responsiveness  |
| Ghir_A03G021100.1 | 874  | 9   | + | salicylic acid responsiveness  |
| Ghir_A03G021100.1 | 1711 | 6   | - | anaerobic induction            |
| Ghir_A03G021100.1 | 1854 | 6   | - | anaerobic induction            |
| Ghir_A03G021100.1 | 804  | 10  | - | light responsiveness           |
| Ghir_A03G021100.1 | 850  | 10  | - | light responsiveness           |
| Ghir_A03G021100.1 | 1918 | 10  | - | light responsiveness           |
| Ghir_A03G021100.1 | 702  | 6   | - | light responsiveness           |
| Ghir_A03G021100.1 | 1133 | 6   | + | low-temperature responsiveness |
| Ghir_A03G021100.1 | 1088 | 6   | - | light responsiveness           |
| Ghir_A03G021100.1 | 1944 | 6   | - | light responsiveness           |
| Ghir_A03G021100.1 | 70   | 6   | - | auxin responsiveness           |
| Ghir_A03G021810.1 | 29   | 6   | + | light responsiveness           |
| Ghir_A03G021810.1 | 723  | 6   | + | light responsiveness           |
| Ghir_A03G021810.1 | 1031 | 6   | - | light responsiveness           |
| Ghir_A03G021810.1 | 1216 | 6   | - | light responsiveness           |
| Ghir_A03G021810.1 | 1460 | 10  | + | light responsiveness           |
| Ghir_A03G021810.1 | 1588 | 6   | + | light responsiveness           |
| Ghir_A03G021810.1 | 379  | 6   | + | drought inducibility           |
| Ghir_A03G021810.1 | 147  | 5   | - | MeJA responsiveness            |
| Ghir_A03G021810.1 | 241  | 5   | - | MeJA responsiveness            |



|                   |      |    |   |                                   |
|-------------------|------|----|---|-----------------------------------|
| Ghir_A03G021810.1 | 692  | 6  | + | anaerobic induction               |
| Ghir_A03G021810.1 | 732  | 14 | + | light responsiveness              |
| Ghir_A03G021810.1 | 1728 | 8  | - | light responsiveness              |
| Ghir_A03G021810.1 | 1905 | 8  | - | light responsiveness              |
| Ghir_A03G021810.1 | 351  | 7  | + | light responsiveness              |
| Ghir_A03G021810.1 | 1964 | 6  | + | light responsiveness              |
| Ghir_A03G021810.1 | 1244 | 9  | - | defense and stress responsiveness |
| Ghir_A03G021810.1 | 1589 | 5  | + | abscisic acid responsiveness      |
| Ghir_A03G021810.1 | 147  | 5  | + | MeJA responsiveness               |
| Ghir_A03G021810.1 | 241  | 5  | + | MeJA responsiveness               |
| Ghir_A05G027550.1 | 609  | 6  | + | anaerobic induction               |
| Ghir_A05G027550.1 | 1957 | 5  | - | MeJA responsiveness               |
| Ghir_A05G027550.1 | 37   | 6  | + | drought inducibility              |
| Ghir_A05G027550.1 | 1388 | 6  | + | drought inducibility              |
| Ghir_A05G027550.1 | 159  | 6  | - | light responsiveness              |
| Ghir_A05G027550.1 | 291  | 6  | + | light responsiveness              |
| Ghir_A05G027550.1 | 1284 | 6  | - | light responsiveness              |
| Ghir_A05G027550.1 | 1308 | 6  | - | light responsiveness              |
| Ghir_A05G027550.1 | 1954 | 8  | - | auxin responsiveness              |
| Ghir_A05G027550.1 | 1957 | 5  | + | MeJA responsiveness               |
| Ghir_A05G027550.1 | 160  | 5  | + | abscisic acid responsiveness      |
| Ghir_A05G027550.1 | 986  | 10 | - | light responsiveness              |
| Ghir_A05G027550.1 | 1795 | 6  | + | light responsiveness              |
| Ghir_A05G027550.1 | 91   | 9  | - | salicylic acid responsiveness     |
| Ghir_A05G028410.1 | 1470 | 8  | + | light responsiveness              |
| Ghir_A05G028410.1 | 1416 | 9  | - | circadian control                 |
| Ghir_A05G028410.1 | 18   | 10 | + | light responsiveness              |
| Ghir_A05G028410.1 | 1484 | 7  | - | gibberellin responsiveness        |
| Ghir_A05G028410.1 | 754  | 5  | - | abscisic acid responsiveness      |
| Ghir_A05G028410.1 | 247  | 5  | - | MeJA responsiveness               |
| Ghir_A05G028410.1 | 756  | 5  | + | MeJA responsiveness               |
| Ghir_A05G028410.1 | 1224 | 9  | + | defense and stress responsiveness |
| Ghir_A05G028410.1 | 1899 | 6  | + | low-temperature responsiveness    |
| Ghir_A05G028410.1 | 298  | 8  | + | light responsiveness              |
| Ghir_A05G028410.1 | 125  | 6  | + | light responsiveness              |
| Ghir_A05G028410.1 | 793  | 6  | + | light responsiveness              |
| Ghir_A05G028410.1 | 925  | 6  | + | light responsiveness              |
| Ghir_A05G028410.1 | 1022 | 6  | - | light responsiveness              |
| Ghir_A05G028410.1 | 1037 | 6  | - | light responsiveness              |
| Ghir_A05G028410.1 | 1092 | 6  | - | light responsiveness              |

|                   |      |     |   |                                   |
|-------------------|------|-----|---|-----------------------------------|
| Ghir_A05G028410.1 | 1326 | 9.5 | - | light responsiveness              |
| Ghir_A05G028410.1 | 754  | 6   | + | light responsiveness              |
| Ghir_A05G028410.1 | 209  | 6   | - | anaerobic induction               |
| Ghir_A05G028410.1 | 1528 | 6   | - | anaerobic induction               |
| Ghir_A05G028410.1 | 1764 | 6   | + | anaerobic induction               |
| Ghir_A05G028410.1 | 247  | 5   | + | MeJA responsiveness               |
| Ghir_A05G028410.1 | 756  | 5   | - | MeJA responsiveness               |
| Ghir_A05G041580.1 | 662  | 13  | - | light responsiveness              |
| Ghir_A05G041580.1 | 1375 | 13  | - | light responsiveness              |
| Ghir_A05G041580.1 | 1487 | 8   | + | light responsiveness              |
| Ghir_A05G041580.1 | 1687 | 8   | + | light responsiveness              |
| Ghir_A05G041580.1 | 1274 | 9   | + | defense and stress responsiveness |
| Ghir_A05G041580.1 | 1278 | 6   | + | light responsiveness              |
| Ghir_A05G041580.1 | 1126 | 6   | - | light responsiveness              |
| Ghir_A05G041580.1 | 1001 | 5   | + | MeJA responsiveness               |
| Ghir_A05G041580.1 | 919  | 7   | - | abscisic acid responsiveness      |
| Ghir_A05G041580.1 | 1550 | 8   | - | light responsiveness              |
| Ghir_A05G041580.1 | 155  | 6   | + | light responsiveness              |
| Ghir_A05G041580.1 | 606  | 6   | + | light responsiveness              |
| Ghir_A05G041580.1 | 1502 | 6   | - | light responsiveness              |
| Ghir_A05G041580.1 | 1887 | 6   | - | auxin responsiveness              |
| Ghir_A05G041580.1 | 1001 | 5   | - | MeJA responsiveness               |
| Ghir_A05G041580.1 | 1232 | 6   | + | anaerobic induction               |
| Ghir_A05G041580.1 | 1588 | 6   | - | anaerobic induction               |
| Ghir_A06G019360.1 | 964  | 6   | - | anaerobic induction               |
| Ghir_A06G019360.1 | 1209 | 6   | - | anaerobic induction               |
| Ghir_A06G019360.1 | 1090 | 6   | - | auxin responsiveness              |
| Ghir_A06G019360.1 | 1511 | 6   | + | auxin responsiveness              |
| Ghir_A06G019360.1 | 49   | 6   | + | drought inducibility              |
| Ghir_A06G019360.1 | 622  | 9   | + | light responsiveness              |
| Ghir_A06G019360.1 | 763  | 9   | - | light responsiveness              |
| Ghir_A06G019360.1 | 643  | 6   | + | light responsiveness              |
| Ghir_A06G019360.1 | 1236 | 6   | - | light responsiveness              |
| Ghir_A06G019360.1 | 1249 | 6   | - | light responsiveness              |
| Ghir_A06G019360.1 | 1339 | 6   | - | light responsiveness              |
| Ghir_A06G019360.1 | 1785 | 6   | - | light responsiveness              |
| Ghir_A06G019360.1 | 1985 | 7   | - | gibberellin responsiveness        |
| Ghir_A06G019360.1 | 1805 | 7   | - | light responsiveness              |
| Ghir_A06G019360.1 | 1806 | 6   | - | light responsiveness              |
| Ghir_A06G019360.1 | 1289 | 9   | + | light responsiveness              |

|                   |      |     |   |                                |
|-------------------|------|-----|---|--------------------------------|
| Ghir_A06G019360.1 | 975  | 6   | - | light responsiveness           |
| Ghir_A06G019360.1 | 242  | 7   | - | auxin responsiveness           |
| Ghir_A09G022110.1 | 768  | 5   | - | MeJA responsiveness            |
| Ghir_A09G022110.1 | 1069 | 5   | + | MeJA responsiveness            |
| Ghir_A09G022110.1 | 1170 | 6   | - | light responsiveness           |
| Ghir_A09G022110.1 | 92   | 6   | + | anoxic specific inducibility   |
| Ghir_A09G022110.1 | 584  | 6   | + | light responsiveness           |
| Ghir_A09G022110.1 | 742  | 6   | + | light responsiveness           |
| Ghir_A09G022110.1 | 1378 | 6   | - | light responsiveness           |
| Ghir_A09G022110.1 | 3    | 5   | + | abscisic acid responsiveness   |
| Ghir_A09G022110.1 | 585  | 5   | + | abscisic acid responsiveness   |
| Ghir_A09G022110.1 | 742  | 5   | - | abscisic acid responsiveness   |
| Ghir_A09G022110.1 | 1371 | 5   | + | abscisic acid responsiveness   |
| Ghir_A09G022110.1 | 1378 | 5   | - | abscisic acid responsiveness   |
| Ghir_A09G022110.1 | 1454 | 7   | - | gibberellin responsiveness     |
| Ghir_A09G022110.1 | 878  | 6   | + | anaerobic induction            |
| Ghir_A09G022110.1 | 1907 | 6   | - | anaerobic induction            |
| Ghir_A09G022110.1 | 971  | 8   | + | light responsiveness           |
| Ghir_A09G022110.1 | 832  | 6   | - | low-temperature responsiveness |
| Ghir_A09G022110.1 | 1969 | 6   | - | low-temperature responsiveness |
| Ghir_A09G022110.1 | 768  | 5   | + | MeJA responsiveness            |
| Ghir_A09G022110.1 | 1069 | 5   | - | MeJA responsiveness            |
| Ghir_A09G022110.1 | 1049 | 6   | + | light responsiveness           |
| Ghir_A09G022110.1 | 1777 | 9   | + | salicylic acid responsiveness  |
| Ghir_A09G022110.1 | 2    | 6   | - | light responsiveness           |
| Ghir_A09G022110.1 | 1370 | 6   | - | light responsiveness           |
| Ghir_A09G022110.1 | 1147 | 13  | - | light responsiveness           |
| Ghir_A10G014150.1 | 243  | 6   | + | light responsiveness           |
| Ghir_A10G014150.1 | 553  | 6   | + | light responsiveness           |
| Ghir_A10G014150.1 | 1051 | 6   | - | light responsiveness           |
| Ghir_A10G014150.1 | 1539 | 9   | - | wound responsiveness           |
| Ghir_A10G014150.1 | 1780 | 9.5 | - | light responsiveness           |
| Ghir_A10G014150.1 | 1283 | 9   | + | light responsiveness           |
| Ghir_A10G014150.1 | 1348 | 9   | + | salicylic acid responsiveness  |
| Ghir_A10G014150.1 | 1659 | 9   | - | salicylic acid responsiveness  |
| Ghir_A10G014150.1 | 849  | 6   | + | light responsiveness           |
| Ghir_A10G014150.1 | 1032 | 6   | + | light responsiveness           |
| Ghir_A10G014150.1 | 1296 | 10  | + | light responsiveness           |
| Ghir_A10G014150.1 | 269  | 6   | - | anaerobic induction            |
| Ghir_A10G014150.1 | 372  | 6   | + | anaerobic induction            |

|                   |      |    |   |                               |
|-------------------|------|----|---|-------------------------------|
| Ghir_A10G014150.1 | 642  | 6  | + | anaerobic induction           |
| Ghir_A10G014150.1 | 1792 | 6  | + | anaerobic induction           |
| Ghir_A10G018390.1 | 1739 | 8  | + | light responsiveness          |
| Ghir_A10G018390.1 | 484  | 6  | + | light responsiveness          |
| Ghir_A10G018390.1 | 814  | 6  | + | light responsiveness          |
| Ghir_A10G018390.1 | 839  | 6  | + | light responsiveness          |
| Ghir_A10G018390.1 | 1402 | 6  | - | light responsiveness          |
| Ghir_A10G018390.1 | 1699 | 6  | - | light responsiveness          |
| Ghir_A10G018390.1 | 584  | 8  | + | light responsiveness          |
| Ghir_A10G018390.1 | 1757 | 6  | - | light responsiveness          |
| Ghir_A10G018390.1 | 1855 | 6  | - | auxin responsiveness          |
| Ghir_A10G018390.1 | 1314 | 6  | + | light responsiveness          |
| Ghir_A10G018390.1 | 1755 | 9  | + | light responsiveness          |
| Ghir_A10G018390.1 | 822  | 7  | - | light responsiveness          |
| Ghir_A10G018390.1 | 731  | 9  | + | abscisic acid responsiveness  |
| Ghir_A10G018390.1 | 1755 | 8  | - | abscisic acid responsiveness  |
| Ghir_A10G018390.1 | 1757 | 5  | - | abscisic acid responsiveness  |
| Ghir_A10G018390.1 | 747  | 9  | - | salicylic acid responsiveness |
| Ghir_A11G031340.1 | 1155 | 5  | - | MeJA responsiveness           |
| Ghir_A11G031340.1 | 227  | 5  | - | abscisic acid responsiveness  |
| Ghir_A11G031340.1 | 926  | 5  | + | abscisic acid responsiveness  |
| Ghir_A11G031340.1 | 1036 | 6  | - | abscisic acid responsiveness  |
| Ghir_A11G031340.1 | 1037 | 5  | + | abscisic acid responsiveness  |
| Ghir_A11G031340.1 | 1222 | 5  | + | abscisic acid responsiveness  |
| Ghir_A11G031340.1 | 1452 | 7  | + | light responsiveness          |
| Ghir_A11G031340.1 | 1725 | 7  | + | light responsiveness          |
| Ghir_A11G031340.1 | 1960 | 7  | - | light responsiveness          |
| Ghir_A11G031340.1 | 1961 | 6  | - | light responsiveness          |
| Ghir_A11G031340.1 | 764  | 9  | + | salicylic acid responsiveness |
| Ghir_A11G031340.1 | 260  | 13 | - | light responsiveness          |
| Ghir_A11G031340.1 | 227  | 6  | + | light responsiveness          |
| Ghir_A11G031340.1 | 1036 | 6  | - | light responsiveness          |
| Ghir_A11G031340.1 | 943  | 6  | - | anaerobic induction           |
| Ghir_A11G031340.1 | 1155 | 5  | + | MeJA responsiveness           |
| Ghir_A11G031340.1 | 152  | 9  | - | light responsiveness          |
| Ghir_A11G031340.1 | 925  | 6  | + | light responsiveness          |
| Ghir_A11G031340.1 | 1035 | 8  | - | light responsiveness          |
| Ghir_A11G031340.1 | 1036 | 6  | - | light responsiveness          |
| Ghir_A11G031340.1 | 1221 | 6  | + | light responsiveness          |
| Ghir_A11G031340.1 | 1219 | 9  | - | light responsiveness          |

|                   |      |   |   |                                   |
|-------------------|------|---|---|-----------------------------------|
| Ghir_A11G031340.1 | 520  | 6 | + | light responsiveness              |
| Ghir_A11G031340.1 | 653  | 6 | + | light responsiveness              |
| Ghir_A11G031340.1 | 1764 | 6 | - | light responsiveness              |
| Ghir_A11G031340.1 | 1768 | 6 | - | light responsiveness              |
| Ghir_A12G002680.1 | 915  | 7 | - | light responsiveness              |
| Ghir_A12G002680.1 | 338  | 5 | - | MeJA responsiveness               |
| Ghir_A12G002680.1 | 1298 | 6 | - | anaerobic induction               |
| Ghir_A12G002680.1 | 1871 | 6 | - | anaerobic induction               |
| Ghir_A12G002680.1 | 1206 | 9 | - | light responsiveness              |
| Ghir_A12G002680.1 | 1160 | 8 | + | light responsiveness              |
| Ghir_A12G002680.1 | 41   | 6 | + | light responsiveness              |
| Ghir_A12G002680.1 | 62   | 6 | + | light responsiveness              |
| Ghir_A12G002680.1 | 151  | 6 | + | light responsiveness              |
| Ghir_A12G002680.1 | 162  | 6 | + | light responsiveness              |
| Ghir_A12G002680.1 | 378  | 6 | + | light responsiveness              |
| Ghir_A12G002680.1 | 975  | 6 | - | drought inducibility              |
| Ghir_A12G002680.1 | 1586 | 6 | - | light responsiveness              |
| Ghir_A12G002680.1 | 533  | 6 | - | light responsiveness              |
| Ghir_A12G002680.1 | 623  | 6 | + | light responsiveness              |
| Ghir_A12G002680.1 | 1598 | 6 | - | light responsiveness              |
| Ghir_A12G002680.1 | 338  | 5 | + | MeJA responsiveness               |
| Ghir_A12G002680.1 | 335  | 8 | - | auxin responsiveness              |
| Ghir_A12G002680.1 | 1688 | 7 | + | gibberellin responsiveness        |
| Ghir_A12G002680.1 | 1163 | 5 | + | abscisic acid responsiveness      |
| Ghir_A12G002680.1 | 1162 | 6 | - | light responsiveness              |
| Ghir_A13G003420.1 | 1304 | 8 | - | light responsiveness              |
| Ghir_A13G003420.1 | 1201 | 6 | - | auxin responsiveness              |
| Ghir_A13G003420.1 | 1484 | 6 | - | light responsiveness              |
| Ghir_A13G003420.1 | 1726 | 9 | - | light responsiveness              |
| Ghir_A13G003420.1 | 988  | 6 | + | light responsiveness              |
| Ghir_A13G003420.1 | 518  | 6 | + | low-temperature responsiveness    |
| Ghir_A13G003420.1 | 937  | 6 | - | anaerobic induction               |
| Ghir_A13G003420.1 | 1521 | 6 | + | anaerobic induction               |
| Ghir_A13G003420.1 | 1571 | 6 | - | anaerobic induction               |
| Ghir_A13G003420.1 | 1866 | 6 | - | anaerobic induction               |
| Ghir_A13G003420.1 | 121  | 5 | - | MeJA responsiveness               |
| Ghir_A13G003420.1 | 1186 | 7 | - | light responsiveness              |
| Ghir_A13G003420.1 | 844  | 9 | + | wound responsiveness              |
| Ghir_A13G003420.1 | 121  | 5 | + | MeJA responsiveness               |
| Ghir_A13G003420.1 | 1353 | 9 | + | defense and stress responsiveness |

|                   |      |    |   |                                |
|-------------------|------|----|---|--------------------------------|
| Ghir_A13G003420.1 | 1575 | 6  | - | light responsiveness           |
| Ghir_A13G009010.1 | 1946 | 9  | + | salicylic acid responsiveness  |
| Ghir_A13G009010.1 | 1811 | 8  | - | light responsiveness           |
| Ghir_A13G009010.1 | 460  | 7  | - | auxin responsiveness           |
| Ghir_A13G009010.1 | 132  | 5  | - | MeJA responsiveness            |
| Ghir_A13G009010.1 | 1381 | 5  | + | abscisic acid responsiveness   |
| Ghir_A13G009010.1 | 346  | 7  | - | gibberellin responsiveness     |
| Ghir_A13G009010.1 | 1445 | 10 | + | light responsiveness           |
| Ghir_A13G009010.1 | 136  | 7  | + | light responsiveness           |
| Ghir_A13G009010.1 | 1919 | 6  | + | light responsiveness           |
| Ghir_A13G009010.1 | 1979 | 6  | - | light responsiveness           |
| Ghir_A13G009010.1 | 1380 | 6  | + | light responsiveness           |
| Ghir_A13G009010.1 | 968  | 9  | + | light responsiveness           |
| Ghir_A13G009010.1 | 14   | 6  | + | light responsiveness           |
| Ghir_A13G009010.1 | 27   | 6  | + | light responsiveness           |
| Ghir_A13G009010.1 | 271  | 6  | + | light responsiveness           |
| Ghir_A13G009010.1 | 291  | 6  | + | light responsiveness           |
| Ghir_A13G009010.1 | 794  | 6  | + | light responsiveness           |
| Ghir_A13G009010.1 | 871  | 6  | + | light responsiveness           |
| Ghir_A13G009010.1 | 35   | 6  | - | anaerobic induction            |
| Ghir_A13G009010.1 | 652  | 6  | - | anaerobic induction            |
| Ghir_A13G009010.1 | 1201 | 6  | + | anaerobic induction            |
| Ghir_A13G009010.1 | 1474 | 8  | + | light responsiveness           |
| Ghir_A13G009010.1 | 132  | 5  | + | MeJA responsiveness            |
| Ghir_A13G015530.1 | 1097 | 6  | - | light responsiveness           |
| Ghir_A13G015530.1 | 1465 | 6  | - | light responsiveness           |
| Ghir_A13G015530.1 | 403  | 6  | + | low-temperature responsiveness |
| Ghir_A13G015530.1 | 251  | 6  | + | light responsiveness           |
| Ghir_A13G015530.1 | 893  | 6  | + | light responsiveness           |
| Ghir_A13G015530.1 | 1699 | 6  | - | light responsiveness           |
| Ghir_A13G015530.1 | 752  | 7  | - | light responsiveness           |
| Ghir_A13G015530.1 | 1931 | 5  | + | MeJA responsiveness            |
| Ghir_A13G015530.1 | 1859 | 6  | - | anaerobic induction            |
| Ghir_A13G015530.1 | 1917 | 6  | - | anaerobic induction            |
| Ghir_A13G015530.1 | 1097 | 6  | - | light responsiveness           |
| Ghir_A13G015530.1 | 1465 | 6  | - | light responsiveness           |
| Ghir_A13G015530.1 | 1140 | 8  | + | light responsiveness           |
| Ghir_A13G015530.1 | 1342 | 6  | + | light responsiveness           |
| Ghir_A13G015530.1 | 1931 | 5  | - | MeJA responsiveness            |
| Ghir_A13G015530.1 | 1097 | 6  | - | abscisic acid responsiveness   |

|                   |      |    |   |                                |
|-------------------|------|----|---|--------------------------------|
| Ghir_A13G015530.1 | 1098 | 5  | + | abscisic acid responsiveness   |
| Ghir_A13G015530.1 | 1465 | 6  | - | abscisic acid responsiveness   |
| Ghir_A13G015530.1 | 1466 | 5  | + | abscisic acid responsiveness   |
| Ghir_D01G005170.1 | 148  | 6  | + | light responsiveness           |
| Ghir_D01G005170.1 | 282  | 6  | + | light responsiveness           |
| Ghir_D01G005170.1 | 297  | 6  | + | light responsiveness           |
| Ghir_D01G005170.1 | 378  | 6  | + | light responsiveness           |
| Ghir_D01G005170.1 | 582  | 6  | + | light responsiveness           |
| Ghir_D01G005170.1 | 784  | 6  | + | light responsiveness           |
| Ghir_D01G005170.1 | 826  | 6  | + | light responsiveness           |
| Ghir_D01G005170.1 | 1606 | 6  | - | light responsiveness           |
| Ghir_D01G005170.1 | 1868 | 6  | - | light responsiveness           |
| Ghir_D01G005170.1 | 311  | 6  | + | auxin responsiveness           |
| Ghir_D01G005170.1 | 656  | 13 | + | light responsiveness           |
| Ghir_D01G005170.1 | 130  | 5  | + | MeJA responsiveness            |
| Ghir_D01G005170.1 | 1014 | 7  | + | light responsiveness           |
| Ghir_D01G005170.1 | 393  | 6  | + | anaerobic induction            |
| Ghir_D01G005170.1 | 1046 | 6  | - | anaerobic induction            |
| Ghir_D01G005170.1 | 1606 | 6  | - | light responsiveness           |
| Ghir_D01G005170.1 | 212  | 6  | - | light responsiveness           |
| Ghir_D01G005170.1 | 448  | 6  | + | light responsiveness           |
| Ghir_D01G005170.1 | 8    | 7  | + | light responsiveness           |
| Ghir_D01G005170.1 | 1606 | 6  | - | abscisic acid responsiveness   |
| Ghir_D01G005170.1 | 1607 | 5  | + | abscisic acid responsiveness   |
| Ghir_D01G005170.1 | 1126 | 7  | - | gibberellin responsiveness     |
| Ghir_D01G005170.1 | 130  | 5  | - | MeJA responsiveness            |
| Ghir_D02G001430.1 | 24   | 5  | - | MeJA responsiveness            |
| Ghir_D02G001430.1 | 1050 | 5  | + | MeJA responsiveness            |
| Ghir_D02G001430.1 | 255  | 6  | - | auxin responsiveness           |
| Ghir_D02G001430.1 | 401  | 6  | + | light responsiveness           |
| Ghir_D02G001430.1 | 14   | 6  | + | light responsiveness           |
| Ghir_D02G001430.1 | 55   | 6  | + | light responsiveness           |
| Ghir_D02G001430.1 | 80   | 6  | + | light responsiveness           |
| Ghir_D02G001430.1 | 1003 | 6  | - | light responsiveness           |
| Ghir_D02G001430.1 | 1023 | 6  | - | light responsiveness           |
| Ghir_D02G001430.1 | 1513 | 6  | - | light responsiveness           |
| Ghir_D02G001430.1 | 1620 | 6  | - | light responsiveness           |
| Ghir_D02G001430.1 | 4    | 8  | + | light responsiveness           |
| Ghir_D02G001430.1 | 1386 | 8  | + | light responsiveness           |
| Ghir_D02G001430.1 | 907  | 6  | + | low-temperature responsiveness |

|                   |      |    |   |                                   |
|-------------------|------|----|---|-----------------------------------|
| Ghir_D02G001430.1 | 24   | 5  | + | MeJA responsiveness               |
| Ghir_D02G001430.1 | 1050 | 5  | - | MeJA responsiveness               |
| Ghir_D02G001430.1 | 401  | 6  | + | abscisic acid responsiveness      |
| Ghir_D02G001430.1 | 402  | 5  | + | abscisic acid responsiveness      |
| Ghir_D02G001430.1 | 586  | 10 | + | light responsiveness              |
| Ghir_D02G001430.1 | 89   | 6  | - | light responsiveness              |
| Ghir_D02G001430.1 | 570  | 6  | + | light responsiveness              |
| Ghir_D02G001430.1 | 874  | 6  | + | light responsiveness              |
| Ghir_D02G001430.1 | 1346 | 6  | - | light responsiveness              |
| Ghir_D02G001430.1 | 1741 | 9  | + | salicylic acid responsiveness     |
| Ghir_D02G001430.1 | 1928 | 8  | - | light responsiveness              |
| Ghir_D02G001430.1 | 401  | 6  | + | light responsiveness              |
| Ghir_D02G007160.1 | 279  | 6  | + | abscisic acid responsiveness      |
| Ghir_D02G007160.1 | 280  | 5  | + | abscisic acid responsiveness      |
| Ghir_D02G007160.1 | 861  | 5  | + | abscisic acid responsiveness      |
| Ghir_D02G007160.1 | 1590 | 7  | - | gibberellin responsiveness        |
| Ghir_D02G007160.1 | 859  | 5  | - | MeJA responsiveness               |
| Ghir_D02G007160.1 | 1711 | 6  | - | light responsiveness              |
| Ghir_D02G007160.1 | 1452 | 6  | + | light responsiveness              |
| Ghir_D02G007160.1 | 1917 | 6  | + | light responsiveness              |
| Ghir_D02G007160.1 | 1937 | 9  | + | defense and stress responsiveness |
| Ghir_D02G007160.1 | 1095 | 10 | - | light responsiveness              |
| Ghir_D02G007160.1 | 1630 | 9  | + | light responsiveness              |
| Ghir_D02G007160.1 | 1959 | 10 | + | light responsiveness              |
| Ghir_D02G007160.1 | 279  | 6  | + | light responsiveness              |
| Ghir_D02G007160.1 | 1594 | 9  | - | wound responsiveness              |
| Ghir_D02G007160.1 | 481  | 13 | + | light responsiveness              |
| Ghir_D02G007160.1 | 859  | 5  | + | MeJA responsiveness               |
| Ghir_D02G007160.1 | 236  | 6  | + | drought inducibility              |
| Ghir_D02G007160.1 | 783  | 6  | - | drought inducibility              |
| Ghir_D02G007160.1 | 290  | 6  | - | auxin responsiveness              |
| Ghir_D02G007160.1 | 508  | 6  | + | light responsiveness              |
| Ghir_D02G007160.1 | 555  | 6  | + | light responsiveness              |
| Ghir_D02G007160.1 | 279  | 6  | + | light responsiveness              |
| Ghir_D02G007160.1 | 860  | 6  | - | light responsiveness              |
| Ghir_D02G007160.1 | 743  | 10 | - | light responsiveness              |
| Ghir_D02G010000.1 | 1269 | 7  | + | gibberellin responsiveness        |
| Ghir_D02G010000.1 | 1938 | 8  | - | light responsiveness              |
| Ghir_D02G010000.1 | 392  | 6  | - | light responsiveness              |
| Ghir_D02G010000.1 | 243  | 5  | - | MeJA responsiveness               |



|                   |      |     |   |                                |
|-------------------|------|-----|---|--------------------------------|
| Ghir_D02G010000.1 | 243  | 8   | + | auxin responsiveness           |
| Ghir_D02G010000.1 | 393  | 5   | + | abscisic acid responsiveness   |
| Ghir_D02G010000.1 | 1253 | 6   | + | light responsiveness           |
| Ghir_D02G010000.1 | 1897 | 6   | - | light responsiveness           |
| Ghir_D02G010000.1 | 821  | 6   | + | light responsiveness           |
| Ghir_D02G010000.1 | 1699 | 6   | - | light responsiveness           |
| Ghir_D02G010000.1 | 1495 | 6   | + | drought inducibility           |
| Ghir_D02G010000.1 | 1983 | 6   | - | drought inducibility           |
| Ghir_D02G010000.1 | 1954 | 9.5 | - | light responsiveness           |
| Ghir_D02G010000.1 | 633  | 8   | - | light responsiveness           |
| Ghir_D02G010000.1 | 1340 | 6   | + | anaerobic induction            |
| Ghir_D02G010000.1 | 243  | 5   | + | MeJA responsiveness            |
| Ghir_D02G010000.1 | 229  | 7   | - | light responsiveness           |
| Ghir_D02G022550.1 | 578  | 9   | - | salicylic acid responsiveness  |
| Ghir_D02G022550.1 | 862  | 9   | + | salicylic acid responsiveness  |
| Ghir_D02G022550.1 | 844  | 6   | + | light responsiveness           |
| Ghir_D02G022550.1 | 13   | 6   | - | light responsiveness           |
| Ghir_D02G022550.1 | 538  | 7   | - | light responsiveness           |
| Ghir_D02G022550.1 | 1671 | 7   | - | light responsiveness           |
| Ghir_D02G022550.1 | 1668 | 7   | + | light responsiveness           |
| Ghir_D02G022550.1 | 1600 | 7   | + | abscisic acid responsiveness   |
| Ghir_D02G022550.1 | 153  | 5   | + | MeJA responsiveness            |
| Ghir_D02G022550.1 | 1944 | 6   | - | light responsiveness           |
| Ghir_D02G022550.1 | 1123 | 6   | + | low-temperature responsiveness |
| Ghir_D02G022550.1 | 838  | 10  | - | light responsiveness           |
| Ghir_D02G022550.1 | 48   | 6   | - | auxin responsiveness           |
| Ghir_D02G022550.1 | 153  | 5   | - | MeJA responsiveness            |
| Ghir_D02G022550.1 | 1536 | 6   | - | anaerobic induction            |
| Ghir_D02G022550.1 | 1711 | 6   | - | anaerobic induction            |
| Ghir_D02G022550.1 | 1854 | 6   | - | anaerobic induction            |
| Ghir_D02G023300.1 | 1268 | 6   | - | light responsiveness           |
| Ghir_D02G023300.1 | 723  | 13  | + | light responsiveness           |
| Ghir_D02G023300.1 | 1722 | 8   | - | light responsiveness           |
| Ghir_D02G023300.1 | 1899 | 8   | - | light responsiveness           |
| Ghir_D02G023300.1 | 343  | 7   | + | light responsiveness           |
| Ghir_D02G023300.1 | 1961 | 6   | + | light responsiveness           |
| Ghir_D02G023300.1 | 1070 | 9   | + | light responsiveness           |
| Ghir_D02G023300.1 | 184  | 7   | - | gibberellin responsiveness     |
| Ghir_D02G023300.1 | 240  | 7   | - | gibberellin responsiveness     |
| Ghir_D02G023300.1 | 976  | 5   | + | abscisic acid responsiveness   |

|                   |      |     |   |                                   |
|-------------------|------|-----|---|-----------------------------------|
| Ghir_D02G023300.1 | 1269 | 5   | + | abscisic acid responsiveness      |
| Ghir_D02G023300.1 | 1587 | 5   | + | abscisic acid responsiveness      |
| Ghir_D02G023300.1 | 232  | 5   | + | MeJA responsiveness               |
| Ghir_D02G023300.1 | 974  | 5   | - | MeJA responsiveness               |
| Ghir_D02G023300.1 | 992  | 5   | + | MeJA responsiveness               |
| Ghir_D02G023300.1 | 714  | 6   | + | light responsiveness              |
| Ghir_D02G023300.1 | 724  | 6   | + | light responsiveness              |
| Ghir_D02G023300.1 | 1233 | 6   | - | light responsiveness              |
| Ghir_D02G023300.1 | 1296 | 10  | + | light responsiveness              |
| Ghir_D02G023300.1 | 975  | 6   | - | light responsiveness              |
| Ghir_D02G023300.1 | 1586 | 6   | + | light responsiveness              |
| Ghir_D02G023300.1 | 920  | 8   | - | light responsiveness              |
| Ghir_D02G023300.1 | 232  | 5   | - | MeJA responsiveness               |
| Ghir_D02G023300.1 | 974  | 5   | + | MeJA responsiveness               |
| Ghir_D02G023300.1 | 992  | 5   | - | MeJA responsiveness               |
| Ghir_D02G023300.1 | 286  | 6   | - | anaerobic induction               |
| Ghir_D02G023300.1 | 587  | 6   | + | anaerobic induction               |
| Ghir_D02G023300.1 | 683  | 6   | + | anaerobic induction               |
| Ghir_D02G023300.1 | 1045 | 6   | + | anaerobic induction               |
| Ghir_D04G001370.1 | 1702 | 8   | + | light responsiveness              |
| Ghir_D04G001370.1 | 1115 | 6   | - | light responsiveness              |
| Ghir_D04G001370.1 | 61   | 9   | + | light responsiveness              |
| Ghir_D04G001370.1 | 1321 | 6   | + | light responsiveness              |
| Ghir_D04G001370.1 | 1317 | 9   | + | defense and stress responsiveness |
| Ghir_D04G001370.1 | 735  | 7   | - | gibberellin responsiveness        |
| Ghir_D04G001370.1 | 1450 | 5   | + | abscisic acid responsiveness      |
| Ghir_D04G001370.1 | 995  | 5   | + | MeJA responsiveness               |
| Ghir_D04G001370.1 | 612  | 6   | + | light responsiveness              |
| Ghir_D04G001370.1 | 1617 | 6   | - | light responsiveness              |
| Ghir_D04G001370.1 | 1449 | 6   | + | light responsiveness              |
| Ghir_D04G001370.1 | 1138 | 6   | - | auxin responsiveness              |
| Ghir_D04G001370.1 | 1886 | 6   | - | auxin responsiveness              |
| Ghir_D04G001370.1 | 931  | 6   | - | drought inducibility              |
| Ghir_D04G001370.1 | 195  | 8   | + | light responsiveness              |
| Ghir_D04G001370.1 | 995  | 5   | - | MeJA responsiveness               |
| Ghir_D04G001370.1 | 322  | 8.5 | + | cell cycle regulation             |
| Ghir_D04G017590.1 | 1036 | 6   | + | auxin responsiveness              |
| Ghir_D04G017590.1 | 803  | 6   | + | drought inducibility              |
| Ghir_D04G017590.1 | 1542 | 8   | - | light responsiveness              |
| Ghir_D04G017590.1 | 20   | 6   | + | low-temperature responsiveness    |

|                   |      |    |   |                                |
|-------------------|------|----|---|--------------------------------|
| Ghir_D04G017590.1 | 922  | 9  | + | light responsiveness           |
| Ghir_D04G017590.1 | 1797 | 6  | - | anaerobic induction            |
| Ghir_D04G017590.1 | 63   | 9  | + | cell cycle regulation          |
| Ghir_D04G017590.1 | 1523 | 8  | - | light responsiveness           |
| Ghir_D04G017590.1 | 1127 | 9  | + | circadian control              |
| Ghir_D04G017590.1 | 1308 | 9  | + | salicylic acid responsiveness  |
| Ghir_D04G017590.1 | 754  | 7  | - | gibberellin responsiveness     |
| Ghir_D04G017590.1 | 1137 | 6  | + | light responsiveness           |
| Ghir_D04G017590.1 | 69   | 6  | + | light responsiveness           |
| Ghir_D04G017590.1 | 1644 | 10 | - | light responsiveness           |
| Ghir_D05G027570.1 | 705  | 6  | + | anaerobic induction            |
| Ghir_D05G027570.1 | 1969 | 6  | + | low-temperature responsiveness |
| Ghir_D05G027570.1 | 478  | 9  | - | light responsiveness           |
| Ghir_D05G027570.1 | 1202 | 6  | + | drought inducibility           |
| Ghir_D05G027570.1 | 533  | 6  | + | light responsiveness           |
| Ghir_D05G027570.1 | 1911 | 6  | + | light responsiveness           |
| Ghir_D05G027570.1 | 86   | 6  | + | light responsiveness           |
| Ghir_D05G027570.1 | 460  | 5  | + | MeJA responsiveness            |
| Ghir_D05G027570.1 | 1780 | 5  | + | MeJA responsiveness            |
| Ghir_D05G027570.1 | 1957 | 5  | + | MeJA responsiveness            |
| Ghir_D05G027570.1 | 1777 | 8  | - | auxin responsiveness           |
| Ghir_D05G027570.1 | 1764 | 13 | - | light responsiveness           |
| Ghir_D05G027570.1 | 269  | 9  | - | salicylic acid responsiveness  |
| Ghir_D05G027570.1 | 460  | 5  | - | MeJA responsiveness            |
| Ghir_D05G027570.1 | 1780 | 5  | - | MeJA responsiveness            |
| Ghir_D05G027570.1 | 1957 | 5  | - | MeJA responsiveness            |
| Ghir_D05G027570.1 | 41   | 7  | + | light responsiveness           |
| Ghir_D05G027570.1 | 436  | 6  | + | light responsiveness           |
| Ghir_D05G027570.1 | 1095 | 6  | - | light responsiveness           |
| Ghir_D05G027570.1 | 1120 | 6  | - | light responsiveness           |
| Ghir_D05G027570.1 | 623  | 6  | + | light responsiveness           |
| Ghir_D05G027570.1 | 1847 | 6  | + | light responsiveness           |
| Ghir_D05G027570.1 | 1556 | 6  | + | auxin responsiveness           |
| Ghir_D05G027570.1 | 1267 | 9  | - | light responsiveness           |
| Ghir_D05G027570.1 | 1539 | 10 | + | light responsiveness           |
| Ghir_D05G027570.1 | 797  | 10 | - | light responsiveness           |
| Ghir_D05G027570.1 | 802  | 10 | - | light responsiveness           |
| Ghir_D05G027570.1 | 1651 | 8  | + | light responsiveness           |
| Ghir_D05G027570.1 | 1848 | 5  | + | abscisic acid responsiveness   |
| Ghir_D05G028420.1 | 546  | 6  | - | anaerobic induction            |

|                   |      |     |   |                                |
|-------------------|------|-----|---|--------------------------------|
| Ghir_D05G028420.1 | 1531 | 6   | + | anaerobic induction            |
| Ghir_D05G028420.1 | 1544 | 6   | + | anaerobic induction            |
| Ghir_D05G028420.1 | 1583 | 6   | - | anaerobic induction            |
| Ghir_D05G028420.1 | 1780 | 6   | + | anaerobic induction            |
| Ghir_D05G028420.1 | 87   | 5   | + | MeJA responsiveness            |
| Ghir_D05G028420.1 | 762  | 8   | + | light responsiveness           |
| Ghir_D05G028420.1 | 1914 | 6   | + | low-temperature responsiveness |
| Ghir_D05G028420.1 | 1747 | 8   | + | light responsiveness           |
| Ghir_D05G028420.1 | 211  | 6   | + | light responsiveness           |
| Ghir_D05G028420.1 | 733  | 6   | + | light responsiveness           |
| Ghir_D05G028420.1 | 776  | 6   | + | light responsiveness           |
| Ghir_D05G028420.1 | 1022 | 6   | - | light responsiveness           |
| Ghir_D05G028420.1 | 1404 | 6   | - | light responsiveness           |
| Ghir_D05G028420.1 | 740  | 9   | - | light responsiveness           |
| Ghir_D05G028420.1 | 1273 | 9.5 | - | light responsiveness           |
| Ghir_D05G028420.1 | 1970 | 5   | - | abscisic acid responsiveness   |
| Ghir_D05G028420.1 | 87   | 5   | - | MeJA responsiveness            |
| Ghir_D05G028420.1 | 1869 | 9   | + | salicylic acid responsiveness  |
| Ghir_D05G028420.1 | 1970 | 6   | + | light responsiveness           |
| Ghir_D06G020520.1 | 1347 | 6   | - | anaerobic induction            |
| Ghir_D06G020520.1 | 1677 | 6   | - | anaerobic induction            |
| Ghir_D06G020520.1 | 1451 | 6   | + | auxin responsiveness           |
| Ghir_D06G020520.1 | 608  | 6   | + | light responsiveness           |
| Ghir_D06G020520.1 | 653  | 6   | + | light responsiveness           |
| Ghir_D06G020520.1 | 676  | 6   | + | light responsiveness           |
| Ghir_D06G020520.1 | 680  | 6   | + | light responsiveness           |
| Ghir_D06G020520.1 | 988  | 6   | + | light responsiveness           |
| Ghir_D06G020520.1 | 1277 | 6   | - | light responsiveness           |
| Ghir_D06G020520.1 | 1608 | 6   | - | light responsiveness           |
| Ghir_D06G020520.1 | 1101 | 6   | - | low-temperature responsiveness |
| Ghir_D06G020520.1 | 1985 | 7   | - | gibberellin responsiveness     |
| Ghir_D06G020520.1 | 350  | 6   | + | light responsiveness           |
| Ghir_D06G020520.1 | 1086 | 6   | + | light responsiveness           |
| Ghir_D06G020520.1 | 913  | 6   | - | light responsiveness           |
| Ghir_D06G020520.1 | 244  | 9   | + | light responsiveness           |
| Ghir_D06G020520.1 | 975  | 10  | - | light responsiveness           |
| Ghir_D09G021400.1 | 1582 | 7   | + | light responsiveness           |
| Ghir_D09G021400.1 | 23   | 5   | + | abscisic acid responsiveness   |
| Ghir_D09G021400.1 | 175  | 6   | + | abscisic acid responsiveness   |
| Ghir_D09G021400.1 | 176  | 5   | + | abscisic acid responsiveness   |

|                   |      |    |   |                                |
|-------------------|------|----|---|--------------------------------|
| Ghir_D09G021400.1 | 716  | 7  | + | abscisic acid responsiveness   |
| Ghir_D09G021400.1 | 887  | 9  | - | abscisic acid responsiveness   |
| Ghir_D09G021400.1 | 889  | 6  | + | abscisic acid responsiveness   |
| Ghir_D09G021400.1 | 890  | 5  | + | abscisic acid responsiveness   |
| Ghir_D09G021400.1 | 1165 | 13 | - | light responsiveness           |
| Ghir_D09G021400.1 | 22   | 6  | - | light responsiveness           |
| Ghir_D09G021400.1 | 175  | 6  | + | light responsiveness           |
| Ghir_D09G021400.1 | 889  | 6  | + | light responsiveness           |
| Ghir_D09G021400.1 | 1774 | 9  | + | salicylic acid responsiveness  |
| Ghir_D09G021400.1 | 1907 | 6  | - | anaerobic induction            |
| Ghir_D09G021400.1 | 1311 | 9  | - | cell cycle regulation          |
| Ghir_D09G021400.1 | 20   | 8  | + | light responsiveness           |
| Ghir_D09G021400.1 | 175  | 6  | + | light responsiveness           |
| Ghir_D09G021400.1 | 790  | 9  | + | light responsiveness           |
| Ghir_D09G021400.1 | 889  | 6  | + | light responsiveness           |
| Ghir_D09G021400.1 | 533  | 6  | + | anoxic specific inducibility   |
| Ghir_D09G021400.1 | 586  | 9  | + | light responsiveness           |
| Ghir_D09G021400.1 | 1188 | 6  | - | light responsiveness           |
| Ghir_D09G021400.1 | 853  | 6  | - | low-temperature responsiveness |
| Ghir_D09G021400.1 | 1969 | 6  | - | low-temperature responsiveness |
| Ghir_D09G021400.1 | 1297 | 6  | + | auxin responsiveness           |
| Ghir_D09G021400.1 | 443  | 6  | + | drought inducibility           |
| Ghir_D09G021400.1 | 751  | 6  | + | drought inducibility           |
| Ghir_D09G021400.1 | 1455 | 6  | + | drought inducibility           |
| Ghir_D10G013410.1 | 805  | 6  | - | auxin responsiveness           |
| Ghir_D10G013410.1 | 1523 | 6  | + | drought inducibility           |
| Ghir_D10G013410.1 | 210  | 6  | + | light responsiveness           |
| Ghir_D10G013410.1 | 1011 | 6  | - | light responsiveness           |
| Ghir_D10G013410.1 | 1485 | 6  | + | low-temperature responsiveness |
| Ghir_D10G013410.1 | 1290 | 9  | + | light responsiveness           |
| Ghir_D10G013410.1 | 112  | 6  | + | anaerobic induction            |
| Ghir_D10G013410.1 | 247  | 6  | + | anaerobic induction            |
| Ghir_D10G013410.1 | 362  | 6  | + | anaerobic induction            |
| Ghir_D10G013410.1 | 671  | 6  | + | anaerobic induction            |
| Ghir_D10G013410.1 | 971  | 6  | + | anaerobic induction            |
| Ghir_D10G013410.1 | 299  | 5  | + | MeJA responsiveness            |
| Ghir_D10G013410.1 | 1663 | 9  | - | salicylic acid responsiveness  |
| Ghir_D10G013410.1 | 793  | 6  | + | light responsiveness           |
| Ghir_D10G013410.1 | 1543 | 9  | - | wound responsiveness           |
| Ghir_D10G013410.1 | 793  | 5  | - | abscisic acid responsiveness   |

|                   |      |   |   |                               |
|-------------------|------|---|---|-------------------------------|
| Ghir_D10G013410.1 | 299  | 5 | - | MeJA responsiveness           |
| Ghir_D10G013410.1 | 797  | 6 | - | light responsiveness          |
| Ghir_D10G019890.1 | 1756 | 9 | + | light responsiveness          |
| Ghir_D10G019890.1 | 560  | 6 | + | light responsiveness          |
| Ghir_D10G019890.1 | 1225 | 6 | + | light responsiveness          |
| Ghir_D10G019890.1 | 1438 | 6 | - | light responsiveness          |
| Ghir_D10G019890.1 | 436  | 7 | - | light responsiveness          |
| Ghir_D10G019890.1 | 709  | 9 | + | abscisic acid responsiveness  |
| Ghir_D10G019890.1 | 1756 | 8 | - | abscisic acid responsiveness  |
| Ghir_D10G019890.1 | 1758 | 5 | - | abscisic acid responsiveness  |
| Ghir_D10G019890.1 | 1196 | 5 | - | MeJA responsiveness           |
| Ghir_D10G019890.1 | 725  | 9 | - | salicylic acid responsiveness |
| Ghir_D10G019890.1 | 1196 | 5 | + | MeJA responsiveness           |
| Ghir_D10G019890.1 | 1740 | 8 | + | light responsiveness          |
| Ghir_D10G019890.1 | 264  | 6 | + | anaerobic induction           |
| Ghir_D10G019890.1 | 1842 | 8 | + | light responsiveness          |
| Ghir_D10G019890.1 | 776  | 6 | + | light responsiveness          |
| Ghir_D10G019890.1 | 804  | 6 | + | light responsiveness          |
| Ghir_D10G019890.1 | 1081 | 6 | - | light responsiveness          |
| Ghir_D10G019890.1 | 1313 | 6 | - | light responsiveness          |
| Ghir_D10G019890.1 | 1600 | 6 | - | light responsiveness          |
| Ghir_D10G019890.1 | 1700 | 6 | - | light responsiveness          |
| Ghir_D10G019890.1 | 1758 | 6 | - | light responsiveness          |
| Ghir_D10G019890.1 | 1855 | 6 | - | auxin responsiveness          |
| Ghir_D12G002680.1 | 1590 | 6 | - | light responsiveness          |
| Ghir_D12G002680.1 | 153  | 9 | - | light responsiveness          |
| Ghir_D12G002680.1 | 501  | 6 | - | light responsiveness          |
| Ghir_D12G002680.1 | 591  | 6 | + | light responsiveness          |
| Ghir_D12G002680.1 | 1602 | 6 | - | light responsiveness          |
| Ghir_D12G002680.1 | 748  | 5 | - | abscisic acid responsiveness  |
| Ghir_D12G002680.1 | 1166 | 5 | + | abscisic acid responsiveness  |
| Ghir_D12G002680.1 | 748  | 6 | + | light responsiveness          |
| Ghir_D12G002680.1 | 1165 | 6 | - | light responsiveness          |
| Ghir_D12G002680.1 | 835  | 9 | + | salicylic acid responsiveness |
| Ghir_D12G002680.1 | 1724 | 9 | + | salicylic acid responsiveness |
| Ghir_D12G002680.1 | 916  | 7 | - | light responsiveness          |
| Ghir_D12G002680.1 | 1301 | 6 | - | anaerobic induction           |
| Ghir_D12G002680.1 | 1873 | 6 | - | anaerobic induction           |
| Ghir_D12G002680.1 | 54   | 6 | + | light responsiveness          |
| Ghir_D12G002680.1 | 147  | 6 | + | light responsiveness          |

|                   |      |    |   |                                   |
|-------------------|------|----|---|-----------------------------------|
| Ghir_D12G002680.1 | 179  | 6  | + | light responsiveness              |
| Ghir_D12G002680.1 | 361  | 6  | + | light responsiveness              |
| Ghir_D12G002680.1 | 17   | 6  | - | low-temperature responsiveness    |
| Ghir_D12G002680.1 | 563  | 6  | + | low-temperature responsiveness    |
| Ghir_D12G002680.1 | 1163 | 8  | + | light responsiveness              |
| Ghir_D12G002680.1 | 1209 | 9  | - | light responsiveness              |
| Ghir_D12G002680.1 | 1355 | 6  | + | drought inducibility              |
| Ghir_D13G003680.1 | 781  | 9  | + | salicylic acid responsiveness     |
| Ghir_D13G003680.1 | 895  | 7  | + | gibberellin responsiveness        |
| Ghir_D13G003680.1 | 109  | 8  | + | abscisic acid responsiveness      |
| Ghir_D13G003680.1 | 110  | 5  | + | abscisic acid responsiveness      |
| Ghir_D13G003680.1 | 126  | 10 | + | defense and stress responsiveness |
| Ghir_D13G003680.1 | 1354 | 9  | + | defense and stress responsiveness |
| Ghir_D13G003680.1 | 1700 | 10 | - | light responsiveness              |
| Ghir_D13G003680.1 | 52   | 10 | - | light responsiveness              |
| Ghir_D13G003680.1 | 1576 | 6  | - | light responsiveness              |
| Ghir_D13G003680.1 | 107  | 9  | - | light responsiveness              |
| Ghir_D13G003680.1 | 130  | 6  | + | light responsiveness              |
| Ghir_D13G003680.1 | 1201 | 6  | - | auxin responsiveness              |
| Ghir_D13G003680.1 | 109  | 6  | + | light responsiveness              |
| Ghir_D13G003680.1 | 1727 | 9  | - | light responsiveness              |
| Ghir_D13G003680.1 | 489  | 10 | + | light responsiveness              |
| Ghir_D13G003680.1 | 989  | 6  | + | light responsiveness              |
| Ghir_D13G003680.1 | 518  | 6  | + | low-temperature responsiveness    |
| Ghir_D13G003680.1 | 937  | 6  | - | anaerobic induction               |
| Ghir_D13G003680.1 | 1314 | 6  | - | anaerobic induction               |
| Ghir_D13G003680.1 | 1522 | 6  | + | anaerobic induction               |
| Ghir_D13G003680.1 | 1572 | 6  | - | anaerobic induction               |
| Ghir_D13G003680.1 | 1867 | 6  | - | anaerobic induction               |
| Ghir_D13G009990.1 | 1489 | 8  | + | light responsiveness              |
| Ghir_D13G009990.1 | 824  | 6  | - | anaerobic induction               |
| Ghir_D13G009990.1 | 1400 | 6  | + | light responsiveness              |
| Ghir_D13G009990.1 | 1010 | 8  | + | light responsiveness              |
| Ghir_D13G009990.1 | 931  | 6  | + | light responsiveness              |
| Ghir_D13G009990.1 | 1401 | 5  | + | abscisic acid responsiveness      |
| Ghir_D13G009990.1 | 956  | 9  | + | light responsiveness              |
| Ghir_D13G009990.1 | 1979 | 6  | - | light responsiveness              |
| Ghir_D13G009990.1 | 211  | 6  | + | light responsiveness              |
| Ghir_D13G009990.1 | 440  | 6  | + | light responsiveness              |
| Ghir_D13G009990.1 | 1919 | 6  | + | light responsiveness              |

|                   |      |   |   |                               |
|-------------------|------|---|---|-------------------------------|
| Ghir_D13G009990.1 | 1946 | 9 | + | salicylic acid responsiveness |
| Ghir_D13G009990.1 | 1808 | 8 | - | light responsiveness          |
| Ghir_D13G016290.1 | 415  | 8 | + | light responsiveness          |
| Ghir_D13G016290.1 | 805  | 6 | + | light responsiveness          |
| Ghir_D13G016290.1 | 885  | 6 | + | light responsiveness          |
| Ghir_D13G016290.1 | 1646 | 6 | - | light responsiveness          |
| Ghir_D13G016290.1 | 1695 | 6 | - | light responsiveness          |
| Ghir_D13G016290.1 | 1467 | 6 | - | light responsiveness          |
| Ghir_D13G016290.1 | 1917 | 6 | - | anaerobic induction           |
| Ghir_D13G016290.1 | 125  | 5 | + | MeJA responsiveness           |
| Ghir_D13G016290.1 | 1931 | 5 | + | MeJA responsiveness           |
| Ghir_D13G016290.1 | 1134 | 8 | + | light responsiveness          |
| Ghir_D13G016290.1 | 1467 | 6 | - | light responsiveness          |
| Ghir_D13G016290.1 | 1467 | 6 | - | abscisic acid responsiveness  |
| Ghir_D13G016290.1 | 1468 | 5 | + | abscisic acid responsiveness  |
| Ghir_D13G016290.1 | 125  | 5 | - | MeJA responsiveness           |
| Ghir_D13G016290.1 | 1931 | 5 | - | MeJA responsiveness           |
| Ghir_D13G016290.1 | 1339 | 6 | + | light responsiveness          |
| Ghir_D13G016290.1 | 1409 | 6 | - | light responsiveness          |
| Ghir_D13G016290.1 | 1721 | 9 | + | light responsiveness          |



**Table S4d. cis elements in Gr RF2 genes**

|                |      |    |   |                                |
|----------------|------|----|---|--------------------------------|
| XP_012436227.1 | 1128 | 6  | - | auxin responsiveness           |
| XP_012436227.1 | 1590 | 6  | - | light responsiveness           |
| XP_012436227.1 | 170  | 9  | - | light responsiveness           |
| XP_012436227.1 | 1161 | 8  | + | light responsiveness           |
| XP_012436227.1 | 1724 | 9  | + | salicylic acid responsiveness  |
| XP_012436227.1 | 749  | 6  | + | light responsiveness           |
| XP_012436227.1 | 1163 | 6  | - | light responsiveness           |
| XP_012436227.1 | 1207 | 9  | - | light responsiveness           |
| XP_012436227.1 | 1353 | 6  | + | drought inducibility           |
| XP_012436227.1 | 504  | 6  | - | light responsiveness           |
| XP_012436227.1 | 594  | 6  | + | light responsiveness           |
| XP_012436227.1 | 1602 | 6  | - | light responsiveness           |
| XP_012436227.1 | 1299 | 6  | - | anaerobic induction            |
| XP_012436227.1 | 1873 | 6  | - | anaerobic induction            |
| XP_012436227.1 | 38   | 6  | - | low-temperature responsiveness |
| XP_012436227.1 | 566  | 6  | + | low-temperature responsiveness |
| XP_012436227.1 | 75   | 6  | + | light responsiveness           |
| XP_012436227.1 | 167  | 6  | + | light responsiveness           |
| XP_012436227.1 | 196  | 6  | + | light responsiveness           |
| XP_012436227.1 | 362  | 6  | + | light responsiveness           |
| XP_012436227.1 | 749  | 5  | - | abscisic acid responsiveness   |
| XP_012436227.1 | 1164 | 5  | + | abscisic acid responsiveness   |
| XP_012436227.1 | 914  | 7  | - | light responsiveness           |
| XP_012436227.1 | 1691 | 7  | + | gibberellin responsiveness     |
| XP_012441813.1 | 958  | 6  | + | light responsiveness           |
| XP_012441813.1 | 1195 | 6  | - | light responsiveness           |
| XP_012441813.1 | 1384 | 5  | + | abscisic acid responsiveness   |
| XP_012441813.1 | 1473 | 8  | + | light responsiveness           |
| XP_012441813.1 | 983  | 9  | + | light responsiveness           |
| XP_012441813.1 | 1039 | 8  | + | light responsiveness           |
| XP_012441813.1 | 850  | 6  | - | anaerobic induction            |
| XP_012441813.1 | 1448 | 10 | + | light responsiveness           |
| XP_012441813.1 | 15   | 6  | - | drought inducibility           |
| XP_012441813.1 | 1979 | 6  | - | light responsiveness           |
| XP_012441813.1 | 1812 | 8  | - | light responsiveness           |
| XP_012441813.1 | 238  | 6  | + | light responsiveness           |
| XP_012441813.1 | 1919 | 6  | + | light responsiveness           |
| XP_012441813.1 | 1946 | 9  | + | salicylic acid responsiveness  |
| XP_012441813.1 | 1383 | 6  | + | light responsiveness           |

|                |      |    |   |                                |
|----------------|------|----|---|--------------------------------|
| XP_012446799.1 | 119  | 6  | + | light responsiveness           |
| XP_012446799.1 | 1554 | 6  | - | light responsiveness           |
| XP_012446799.1 | 509  | 7  | - | gibberellin responsiveness     |
| XP_012446799.1 | 478  | 5  | + | MeJA responsiveness            |
| XP_012446799.1 | 1780 | 5  | + | MeJA responsiveness            |
| XP_012446799.1 | 1957 | 5  | + | MeJA responsiveness            |
| XP_012446799.1 | 1651 | 8  | + | light responsiveness           |
| XP_012446799.1 | 285  | 9  | - | salicylic acid responsiveness  |
| XP_012446799.1 | 637  | 6  | + | light responsiveness           |
| XP_012446799.1 | 1847 | 6  | + | light responsiveness           |
| XP_012446799.1 | 1202 | 6  | + | drought inducibility           |
| XP_012446799.1 | 810  | 10 | - | light responsiveness           |
| XP_012446799.1 | 815  | 10 | - | light responsiveness           |
| XP_012446799.1 | 496  | 9  | - | light responsiveness           |
| XP_012446799.1 | 547  | 6  | + | light responsiveness           |
| XP_012446799.1 | 1267 | 9  | - | light responsiveness           |
| XP_012446799.1 | 719  | 6  | + | anaerobic induction            |
| XP_012446799.1 | 1969 | 6  | + | low-temperature responsiveness |
| XP_012446799.1 | 1764 | 13 | - | light responsiveness           |
| XP_012446799.1 | 454  | 6  | + | light responsiveness           |
| XP_012446799.1 | 1095 | 6  | - | light responsiveness           |
| XP_012446799.1 | 1120 | 6  | - | light responsiveness           |
| XP_012446799.1 | 1664 | 6  | - | light responsiveness           |
| XP_012446799.1 | 74   | 7  | + | light responsiveness           |
| XP_012446799.1 | 1777 | 8  | - | auxin responsiveness           |
| XP_012446799.1 | 1848 | 5  | + | abscisic acid responsiveness   |
| XP_012446799.1 | 478  | 5  | - | MeJA responsiveness            |
| XP_012446799.1 | 1780 | 5  | - | MeJA responsiveness            |
| XP_012446799.1 | 1957 | 5  | - | MeJA responsiveness            |
| XP_012447231.1 | 781  | 8  | + | light responsiveness           |
| XP_012447231.1 | 102  | 5  | - | MeJA responsiveness            |
| XP_012447231.1 | 1869 | 9  | + | salicylic acid responsiveness  |
| XP_012447231.1 | 1914 | 6  | + | low-temperature responsiveness |
| XP_012447231.1 | 226  | 6  | + | light responsiveness           |
| XP_012447231.1 | 589  | 6  | + | light responsiveness           |
| XP_012447231.1 | 752  | 6  | + | light responsiveness           |
| XP_012447231.1 | 795  | 6  | + | light responsiveness           |
| XP_012447231.1 | 1041 | 6  | - | light responsiveness           |
| XP_012447231.1 | 1402 | 6  | - | light responsiveness           |
| XP_012447231.1 | 102  | 5  | + | MeJA responsiveness            |

|                |      |     |   |                                |
|----------------|------|-----|---|--------------------------------|
| XP_012447231.1 | 1550 | 7   | - | gibberellin responsiveness     |
| XP_012447231.1 | 759  | 9   | - | light responsiveness           |
| XP_012447231.1 | 1297 | 9.5 | - | light responsiveness           |
| XP_012447231.1 | 1758 | 8   | + | light responsiveness           |
| XP_012447231.1 | 64   | 6   | - | anaerobic induction            |
| XP_012447231.1 | 565  | 6   | - | anaerobic induction            |
| XP_012447231.1 | 1529 | 6   | + | anaerobic induction            |
| XP_012447231.1 | 1594 | 6   | - | anaerobic induction            |
| XP_012447231.1 | 1791 | 6   | + | anaerobic induction            |
| XP_012449361.1 | 1778 | 13  | - | light responsiveness           |
| XP_012449361.1 | 1345 | 6   | - | anaerobic induction            |
| XP_012449361.1 | 1676 | 6   | - | anaerobic induction            |
| XP_012449361.1 | 604  | 6   | + | light responsiveness           |
| XP_012449361.1 | 649  | 6   | + | light responsiveness           |
| XP_012449361.1 | 672  | 6   | + | light responsiveness           |
| XP_012449361.1 | 676  | 6   | + | light responsiveness           |
| XP_012449361.1 | 984  | 6   | + | light responsiveness           |
| XP_012449361.1 | 1275 | 6   | - | light responsiveness           |
| XP_012449361.1 | 1606 | 6   | - | light responsiveness           |
| XP_012449361.1 | 1098 | 6   | - | low-temperature responsiveness |
| XP_012449361.1 | 1985 | 7   | - | gibberellin responsiveness     |
| XP_012449361.1 | 1449 | 6   | + | auxin responsiveness           |
| XP_012449361.1 | 909  | 6   | - | light responsiveness           |
| XP_012449361.1 | 239  | 9   | + | light responsiveness           |
| XP_012449361.1 | 346  | 6   | + | light responsiveness           |
| XP_012449361.1 | 1083 | 6   | + | light responsiveness           |
| XP_012449361.1 | 971  | 10  | - | light responsiveness           |
| XP_012456530.1 | 65   | 6   | + | anaerobic induction            |
| XP_012456530.1 | 343  | 6   | + | anaerobic induction            |
| XP_012456530.1 | 640  | 6   | + | anaerobic induction            |
| XP_012456530.1 | 970  | 6   | + | anaerobic induction            |
| XP_012456530.1 | 1542 | 9   | - | wound responsiveness           |
| XP_012456530.1 | 1484 | 6   | + | low-temperature responsiveness |
| XP_012456530.1 | 773  | 5   | - | abscisic acid responsiveness   |
| XP_012456530.1 | 1076 | 5   | + | abscisic acid responsiveness   |
| XP_012456530.1 | 280  | 5   | + | MeJA responsiveness            |
| XP_012456530.1 | 675  | 9   | + | light responsiveness           |
| XP_012456530.1 | 777  | 6   | - | light responsiveness           |
| XP_012456530.1 | 785  | 6   | - | auxin responsiveness           |
| XP_012456530.1 | 280  | 5   | - | MeJA responsiveness            |

|                |      |   |   |                               |
|----------------|------|---|---|-------------------------------|
| XP_012456530.1 | 1073 | 8 | + | light responsiveness          |
| XP_012456530.1 | 1354 | 9 | + | salicylic acid responsiveness |
| XP_012456530.1 | 1662 | 9 | - | salicylic acid responsiveness |
| XP_012456530.1 | 773  | 6 | + | light responsiveness          |
| XP_012456530.1 | 1075 | 6 | - | light responsiveness          |
| XP_012456530.1 | 1289 | 9 | + | light responsiveness          |
| XP_012456530.1 | 1522 | 6 | + | drought inducibility          |
| XP_012456653.1 | 733  | 9 | - | salicylic acid responsiveness |
| XP_012456653.1 | 1758 | 6 | - | light responsiveness          |
| XP_012456653.1 | 1756 | 9 | + | light responsiveness          |
| XP_012456653.1 | 1855 | 6 | - | auxin responsiveness          |
| XP_012456653.1 | 570  | 6 | + | light responsiveness          |
| XP_012456653.1 | 657  | 7 | + | light responsiveness          |
| XP_012456653.1 | 1232 | 6 | + | light responsiveness          |
| XP_012456653.1 | 1435 | 6 | - | light responsiveness          |
| XP_012456653.1 | 1740 | 8 | + | light responsiveness          |
| XP_012456653.1 | 313  | 6 | + | drought inducibility          |
| XP_012456653.1 | 266  | 6 | + | anaerobic induction           |
| XP_012456653.1 | 552  | 8 | + | light responsiveness          |
| XP_012456653.1 | 1842 | 8 | + | light responsiveness          |
| XP_012456653.1 | 717  | 9 | + | abscisic acid responsiveness  |
| XP_012456653.1 | 1756 | 8 | - | abscisic acid responsiveness  |
| XP_012456653.1 | 1758 | 5 | - | abscisic acid responsiveness  |
| XP_012456653.1 | 681  | 6 | + | light responsiveness          |
| XP_012456653.1 | 784  | 6 | + | light responsiveness          |
| XP_012456653.1 | 994  | 6 | + | light responsiveness          |
| XP_012456653.1 | 1088 | 6 | - | light responsiveness          |
| XP_012456653.1 | 1320 | 6 | - | light responsiveness          |
| XP_012456653.1 | 1700 | 6 | - | light responsiveness          |
| XP_012456653.1 | 446  | 7 | - | light responsiveness          |
| XP_012457700.1 | 147  | 6 | + | light responsiveness          |
| XP_012457700.1 | 379  | 6 | + | light responsiveness          |
| XP_012457700.1 | 582  | 6 | + | light responsiveness          |
| XP_012457700.1 | 784  | 6 | + | light responsiveness          |
| XP_012457700.1 | 800  | 6 | + | light responsiveness          |
| XP_012457700.1 | 7    | 7 | + | light responsiveness          |
| XP_012457700.1 | 1125 | 7 | - | gibberellin responsiveness    |
| XP_012457700.1 | 1605 | 6 | - | abscisic acid responsiveness  |
| XP_012457700.1 | 1606 | 5 | + | abscisic acid responsiveness  |
| XP_012457700.1 | 1013 | 7 | + | light responsiveness          |

|                |      |   |   |                                   |
|----------------|------|---|---|-----------------------------------|
| XP_012457700.1 | 394  | 6 | + | anaerobic induction               |
| XP_012457700.1 | 1045 | 6 | - | anaerobic induction               |
| XP_012457700.1 | 1605 | 6 | - | light responsiveness              |
| XP_012457700.1 | 448  | 6 | + | light responsiveness              |
| XP_012457700.1 | 1605 | 6 | - | light responsiveness              |
| XP_012457700.1 | 1868 | 6 | - | light responsiveness              |
| XP_012460397.1 | 1104 | 6 | - | light responsiveness              |
| XP_012460397.1 | 1127 | 6 | - | auxin responsiveness              |
| XP_012460397.1 | 1886 | 6 | - | auxin responsiveness              |
| XP_012460397.1 | 34   | 9 | + | light responsiveness              |
| XP_012460397.1 | 1487 | 6 | + | light responsiveness              |
| XP_012460397.1 | 1147 | 9 | + | salicylic acid responsiveness     |
| XP_012460397.1 | 975  | 5 | + | MeJA responsiveness               |
| XP_012460397.1 | 168  | 8 | + | light responsiveness              |
| XP_012460397.1 | 1307 | 6 | + | light responsiveness              |
| XP_012460397.1 | 1702 | 8 | + | light responsiveness              |
| XP_012460397.1 | 907  | 6 | - | drought inducibility              |
| XP_012460397.1 | 1303 | 9 | + | defense and stress responsiveness |
| XP_012460397.1 | 585  | 6 | + | light responsiveness              |
| XP_012460397.1 | 975  | 5 | - | MeJA responsiveness               |
| XP_012460397.1 | 1488 | 5 | + | abscisic acid responsiveness      |
| XP_012460807.1 | 1373 | 6 | - | light responsiveness              |
| XP_012460807.1 | 1049 | 6 | - | light responsiveness              |
| XP_012460807.1 | 1609 | 8 | - | light responsiveness              |
| XP_012460807.1 | 825  | 6 | - | light responsiveness              |
| XP_012460807.1 | 824  | 5 | - | MeJA responsiveness               |
| XP_012460807.1 | 186  | 7 | - | light responsiveness              |
| XP_012460807.1 | 187  | 6 | - | light responsiveness              |
| XP_012460807.1 | 328  | 7 | - | light responsiveness              |
| XP_012460807.1 | 329  | 6 | - | light responsiveness              |
| XP_012460807.1 | 840  | 6 | + | light responsiveness              |
| XP_012460807.1 | 1026 | 6 | + | light responsiveness              |
| XP_012460807.1 | 808  | 8 | - | light responsiveness              |
| XP_012460807.1 | 709  | 8 | + | light responsiveness              |
| XP_012460807.1 | 395  | 7 | + | abscisic acid responsiveness      |
| XP_012460807.1 | 826  | 5 | + | abscisic acid responsiveness      |
| XP_012460807.1 | 824  | 5 | + | MeJA responsiveness               |
| XP_012460807.1 | 344  | 6 | + | light responsiveness              |
| XP_012460807.1 | 575  | 6 | + | light responsiveness              |
| XP_012460807.1 | 950  | 6 | + | light responsiveness              |

|                |      |    |   |                                   |
|----------------|------|----|---|-----------------------------------|
| XP_012460807.1 | 554  | 9  | - | circadian control                 |
| XP_012460807.1 | 1836 | 6  | - | anaerobic induction               |
| XP_012460807.1 | 1612 | 8  | + | light responsiveness              |
| XP_012460807.1 | 1035 | 9  | - | defense and stress responsiveness |
| XP_012460807.1 | 1373 | 9  | - | defense and stress responsiveness |
| XP_012463962.1 | 504  | 6  | + | low-temperature responsiveness    |
| XP_012463962.1 | 990  | 6  | + | light responsiveness              |
| XP_012463962.1 | 121  | 5  | - | MeJA responsiveness               |
| XP_012463962.1 | 896  | 7  | + | gibberellin responsiveness        |
| XP_012463962.1 | 134  | 9  | + | defense and stress responsiveness |
| XP_012463962.1 | 1355 | 9  | + | defense and stress responsiveness |
| XP_012463962.1 | 1700 | 10 | - | light responsiveness              |
| XP_012463962.1 | 938  | 6  | - | anaerobic induction               |
| XP_012463962.1 | 1315 | 6  | - | anaerobic induction               |
| XP_012463962.1 | 1523 | 6  | + | anaerobic induction               |
| XP_012463962.1 | 1572 | 6  | - | anaerobic induction               |
| XP_012463962.1 | 1867 | 6  | - | anaerobic induction               |
| XP_012463962.1 | 60   | 10 | - | light responsiveness              |
| XP_012463962.1 | 138  | 6  | + | light responsiveness              |
| XP_012463962.1 | 1576 | 6  | - | light responsiveness              |
| XP_012463962.1 | 1202 | 6  | - | auxin responsiveness              |
| XP_012463962.1 | 121  | 5  | + | MeJA responsiveness               |
| XP_012463962.1 | 1727 | 9  | - | light responsiveness              |
| XP_012464256.1 | 470  | 8  | + | light responsiveness              |
| XP_012464256.1 | 74   | 6  | + | anaerobic induction               |
| XP_012464256.1 | 1917 | 6  | - | anaerobic induction               |
| XP_012464256.1 | 490  | 6  | + | low-temperature responsiveness    |
| XP_012464256.1 | 837  | 6  | + | light responsiveness              |
| XP_012464256.1 | 917  | 6  | + | light responsiveness              |
| XP_012464256.1 | 1691 | 6  | - | light responsiveness              |
| XP_012464256.1 | 1471 | 6  | - | abscisic acid responsiveness      |
| XP_012464256.1 | 1472 | 5  | + | abscisic acid responsiveness      |
| XP_012464256.1 | 179  | 5  | + | MeJA responsiveness               |
| XP_012464256.1 | 1931 | 5  | + | MeJA responsiveness               |
| XP_012464256.1 | 1354 | 6  | + | light responsiveness              |
| XP_012464256.1 | 179  | 5  | - | MeJA responsiveness               |
| XP_012464256.1 | 1931 | 5  | - | MeJA responsiveness               |
| XP_012464256.1 | 1471 | 6  | - | light responsiveness              |
| XP_012464256.1 | 1471 | 6  | - | light responsiveness              |
| XP_012464256.1 | 1717 | 9  | + | light responsiveness              |

|                |      |     |   |                                |
|----------------|------|-----|---|--------------------------------|
| XP_012464256.1 | 45   | 9   | + | light responsiveness           |
| XP_012464256.1 | 1146 | 8   | + | light responsiveness           |
| XP_012464256.1 | 1413 | 6   | - | light responsiveness           |
| XP_012478118.1 | 219  | 7   | - | light responsiveness           |
| XP_012478118.1 | 233  | 8   | + | auxin responsiveness           |
| XP_012478118.1 | 383  | 5   | + | abscisic acid responsiveness   |
| XP_012478118.1 | 233  | 5   | + | MeJA responsiveness            |
| XP_012478118.1 | 134  | 6   | + | light responsiveness           |
| XP_012478118.1 | 1342 | 6   | + | anaerobic induction            |
| XP_012478118.1 | 1954 | 9.5 | - | light responsiveness           |
| XP_012478118.1 | 623  | 8   | - | light responsiveness           |
| XP_012478118.1 | 1495 | 6   | + | drought inducibility           |
| XP_012478118.1 | 1983 | 6   | - | drought inducibility           |
| XP_012478118.1 | 1938 | 8   | - | light responsiveness           |
| XP_012478118.1 | 828  | 6   | + | light responsiveness           |
| XP_012478118.1 | 1699 | 6   | - | light responsiveness           |
| XP_012478118.1 | 382  | 6   | - | light responsiveness           |
| XP_012478118.1 | 233  | 5   | - | MeJA responsiveness            |
| XP_012478118.1 | 1255 | 6   | + | light responsiveness           |
| XP_012478118.1 | 1897 | 6   | - | light responsiveness           |
| XP_012480294.1 | 1123 | 6   | + | low-temperature responsiveness |
| XP_012480294.1 | 1944 | 6   | - | light responsiveness           |
| XP_012480294.1 | 534  | 7   | - | light responsiveness           |
| XP_012480294.1 | 1670 | 7   | - | light responsiveness           |
| XP_012480294.1 | 1599 | 7   | + | abscisic acid responsiveness   |
| XP_012480294.1 | 147  | 5   | - | MeJA responsiveness            |
| XP_012480294.1 | 1535 | 6   | - | anaerobic induction            |
| XP_012480294.1 | 1710 | 6   | - | anaerobic induction            |
| XP_012480294.1 | 1853 | 6   | - | anaerobic induction            |
| XP_012480294.1 | 838  | 10  | - | light responsiveness           |
| XP_012480294.1 | 1667 | 7   | + | light responsiveness           |
| XP_012480294.1 | 844  | 6   | + | light responsiveness           |
| XP_012480294.1 | 43   | 6   | - | auxin responsiveness           |
| XP_012480294.1 | 6    | 6   | - | light responsiveness           |
| XP_012480294.1 | 147  | 5   | + | MeJA responsiveness            |
| XP_012480294.1 | 574  | 9   | - | salicylic acid responsiveness  |
| XP_012480294.1 | 862  | 9   | + | salicylic acid responsiveness  |
| XP_012480421.1 | 1721 | 8   | - | light responsiveness           |
| XP_012480421.1 | 1899 | 8   | - | light responsiveness           |
| XP_012480421.1 | 1275 | 6   | - | light responsiveness           |

|                |      |    |   |                                |
|----------------|------|----|---|--------------------------------|
| XP_012480421.1 | 1386 | 9  | - | salicylic acid responsiveness  |
| XP_012480421.1 | 1586 | 6  | + | light responsiveness           |
| XP_012480421.1 | 999  | 5  | + | MeJA responsiveness            |
| XP_012480421.1 | 1961 | 6  | + | light responsiveness           |
| XP_012480421.1 | 927  | 8  | - | light responsiveness           |
| XP_012480421.1 | 1276 | 5  | + | abscisic acid responsiveness   |
| XP_012480421.1 | 1587 | 5  | + | abscisic acid responsiveness   |
| XP_012480421.1 | 999  | 5  | - | MeJA responsiveness            |
| XP_012480421.1 | 45   | 6  | + | light responsiveness           |
| XP_012480421.1 | 69   | 6  | + | light responsiveness           |
| XP_012480421.1 | 153  | 6  | + | light responsiveness           |
| XP_012480421.1 | 718  | 6  | + | light responsiveness           |
| XP_012480421.1 | 728  | 6  | + | light responsiveness           |
| XP_012480421.1 | 1240 | 6  | - | light responsiveness           |
| XP_012480421.1 | 221  | 6  | + | low-temperature responsiveness |
| XP_012480421.1 | 303  | 6  | + | low-temperature responsiveness |
| XP_012480421.1 | 727  | 13 | + | light responsiveness           |
| XP_012480421.1 | 687  | 6  | + | anaerobic induction            |
| XP_012480421.1 | 1052 | 6  | + | anaerobic induction            |
| XP_012480421.1 | 1077 | 9  | + | light responsiveness           |
| XP_012481534.1 | 1737 | 9  | + | salicylic acid responsiveness  |
| XP_012481534.1 | 373  | 6  | + | light responsiveness           |
| XP_012481534.1 | 1047 | 5  | - | MeJA responsiveness            |
| XP_012481534.1 | 225  | 6  | - | auxin responsiveness           |
| XP_012481534.1 | 60   | 6  | - | light responsiveness           |
| XP_012481534.1 | 553  | 6  | + | light responsiveness           |
| XP_012481534.1 | 1928 | 8  | - | light responsiveness           |
| XP_012481534.1 | 857  | 6  | + | light responsiveness           |
| XP_012481534.1 | 1344 | 6  | - | light responsiveness           |
| XP_012481534.1 | 1388 | 6  | - | light responsiveness           |
| XP_012481534.1 | 569  | 10 | + | light responsiveness           |
| XP_012481534.1 | 373  | 6  | + | light responsiveness           |
| XP_012481534.1 | 373  | 6  | + | abscisic acid responsiveness   |
| XP_012481534.1 | 374  | 5  | + | abscisic acid responsiveness   |
| XP_012481534.1 | 1047 | 5  | + | MeJA responsiveness            |
| XP_012481534.1 | 26   | 6  | + | light responsiveness           |
| XP_012481534.1 | 51   | 6  | + | light responsiveness           |
| XP_012481534.1 | 1000 | 6  | - | light responsiveness           |
| XP_012481534.1 | 1020 | 6  | - | light responsiveness           |
| XP_012481534.1 | 1293 | 6  | - | light responsiveness           |



|                |      |    |   |                                |
|----------------|------|----|---|--------------------------------|
| XP_012481534.1 | 1511 | 6  | - | light responsiveness           |
| XP_012481534.1 | 1618 | 6  | - | light responsiveness           |
| XP_012481534.1 | 890  | 6  | + | low-temperature responsiveness |
| XP_012487039.1 | 1185 | 6  | - | light responsiveness           |
| XP_012487039.1 | 1585 | 7  | + | light responsiveness           |
| XP_012487039.1 | 671  | 6  | + | low-temperature responsiveness |
| XP_012487039.1 | 852  | 6  | - | low-temperature responsiveness |
| XP_012487039.1 | 1969 | 6  | - | low-temperature responsiveness |
| XP_012487039.1 | 24   | 5  | + | abscisic acid responsiveness   |
| XP_012487039.1 | 174  | 6  | + | abscisic acid responsiveness   |
| XP_012487039.1 | 175  | 5  | + | abscisic acid responsiveness   |
| XP_012487039.1 | 715  | 7  | + | abscisic acid responsiveness   |
| XP_012487039.1 | 886  | 9  | - | abscisic acid responsiveness   |
| XP_012487039.1 | 888  | 6  | + | abscisic acid responsiveness   |
| XP_012487039.1 | 889  | 5  | + | abscisic acid responsiveness   |
| XP_012487039.1 | 1310 | 9  | - | cell cycle regulation          |
| XP_012487039.1 | 898  | 6  | + | anaerobic induction            |
| XP_012487039.1 | 1907 | 6  | - | anaerobic induction            |
| XP_012487039.1 | 23   | 6  | - | light responsiveness           |
| XP_012487039.1 | 174  | 6  | + | light responsiveness           |
| XP_012487039.1 | 888  | 6  | + | light responsiveness           |
| XP_012487039.1 | 442  | 6  | + | drought inducibility           |
| XP_012487039.1 | 596  | 6  | + | drought inducibility           |
| XP_012487039.1 | 750  | 6  | + | drought inducibility           |
| XP_012487039.1 | 1455 | 6  | + | drought inducibility           |
| XP_012487039.1 | 585  | 9  | + | light responsiveness           |
| XP_012487039.1 | 584  | 11 | + | light responsiveness           |
| XP_012487039.1 | 1777 | 9  | + | salicylic acid responsiveness  |
| XP_012487039.1 | 21   | 8  | + | light responsiveness           |
| XP_012487039.1 | 174  | 6  | + | light responsiveness           |
| XP_012487039.1 | 789  | 9  | + | light responsiveness           |
| XP_012487039.1 | 888  | 6  | + | light responsiveness           |
| XP_012488308.1 | 120  | 5  | - | MeJA responsiveness            |
| XP_012488308.1 | 977  | 5  | + | MeJA responsiveness            |
| XP_012488308.1 | 1151 | 5  | + | MeJA responsiveness            |
| XP_012488308.1 | 1359 | 5  | + | MeJA responsiveness            |
| XP_012488308.1 | 538  | 6  | + | light responsiveness           |
| XP_012488308.1 | 627  | 6  | + | light responsiveness           |
| XP_012488308.1 | 1765 | 6  | - | light responsiveness           |
| XP_012488308.1 | 1769 | 6  | - | light responsiveness           |

|                |      |    |   |                                |
|----------------|------|----|---|--------------------------------|
| XP_012488308.1 | 217  | 13 | - | light responsiveness           |
| XP_012488308.1 | 126  | 6  | + | low-temperature responsiveness |
| XP_012488308.1 | 190  | 6  | + | low-temperature responsiveness |
| XP_012488308.1 | 1036 | 6  | - | anaerobic induction            |
| XP_012488308.1 | 1511 | 8  | - | light responsiveness           |
| XP_012488308.1 | 135  | 9  | - | light responsiveness           |
| XP_012488308.1 | 1465 | 7  | + | light responsiveness           |
| XP_012488308.1 | 1725 | 7  | + | light responsiveness           |
| XP_012488308.1 | 176  | 6  | + | drought inducibility           |
| XP_012488308.1 | 120  | 5  | + | MeJA responsiveness            |
| XP_012488308.1 | 977  | 5  | - | MeJA responsiveness            |
| XP_012488308.1 | 1151 | 5  | - | MeJA responsiveness            |
| XP_012488308.1 | 1359 | 5  | - | MeJA responsiveness            |
| XP_012488308.1 | 165  | 7  | - | gibberellin responsiveness     |
| XP_012488308.1 | 1960 | 7  | - | light responsiveness           |
| XP_012488308.1 | 1961 | 6  | - | light responsiveness           |
